# Supplementary material for: Pyrrolo[2,3-d]pyrimidine synthesis through activation of N-benzyl groups by distal amides
Source: Royal Society of Chemistry journal article supplement (doi:10.1039/c3ob41477a), 2013-01-01

## Supporting information

### **Pyrrolo[2,3-*d*]pyrimidines synthesis through activation of *N*-benzyl groups by a distal amide function**

Laurent El Kaim, Laurence Grimaud and Simon Wagschal.

*Laboratoire Chimie et procédés,*

*Ecole Nationale Supérieure de Techniques Avancées,*

*828 Bd des Maréchaux, 91120 Palaiseau .France*

[laurent.elkaim@ensta.fr](mailto:laurent.elkaim@ensta.fr); [laurence.grimaud@ensta.fr](mailto:laurence.grimaud@ensta.fr); [simon.wagschal@ensta.fr](mailto:simon.wagschal@ensta.fr)

S3 : General procedure for the synthesis of the Ugi-Smiles adducts.

S4-33 : Characterization data of compounds **1a-1o** and their corresponding  $^1\text{H}$  and  $^{13}\text{C}$  NMR spectra.

S34 : General procedure for the synthesis of the Sonogashira adducts

S35-64 : Characterization data of compounds **2a-2o** and their corresponding  $^1\text{H}$  and  $^{13}\text{C}$  NMR spectra.

S61 : General procedure for the synthesis of the pyrrolo[2,3-*d*]pyrimidines

S62-83 : Characterization data of compounds **3a-3l** and their corresponding  $^1\text{H}$  and  $^{13}\text{C}$  NMR spectra.

S84-95 : Procedure for the synthesis of the compounds **4-7** and their corresponding  $^1\text{H}$  and  $^{13}\text{C}$  NMR spectra.

$^1\text{H}$  NMR spectra were recorded on a 400 MHz spectrometer, using  $\text{CDCl}_3$  solvent as reference and/or internal deuterium lock.  $^{13}\text{C}$  NMR spectra were recorded on a 100.6 MHz spectrometer. Two-dimensional NMR spectroscopy [ $^1\text{H}$  -  $^1\text{H}$  COSY spectra,  $^1\text{H}$  -  $^{13}\text{C}$  COSY spectra (HSQC) and long-range  $^1\text{H}$  -  $^{13}\text{C}$  COSY spectra (HMBC)], were carried out to determine the correlation between  $^1\text{H}$  and  $^{13}\text{C}$ . The chemical shifts for all NMR spectra are expressed in parts per million to high frequency of TMS reference. Coupling constants (J) are quoted in Hz and are recorded to the nearest 0.1 Hz.

The IR spectra were obtained using ATR accessories. High-resolution (HR) mass spectra were performed on a GC/MS system spectrometer. TLC was carried out using precoated plates of silica gel 60F254.

**General procedure for the synthesis of the Smiles adducts :**

To a 1 M solution of pyrimidin-4-ol in methanol were added successively 1.0 equiv. of amine, 1.0 equiv. of aldehyde and 1.0 equiv. of isocyanide. The resulting mixture was stirred at 60°C for three days. The solvent was removed afterwards under reduced pressure to afford Ugi-Smiles products after purification by flash chromatography on silica gel.

**2-[(5-iodo-2-isopropyl-6-methylpyrimidin-4-yl)-(2-methoxyethyl)-amino]-4-methylpentanoic acid 4-methoxybenzylamide**

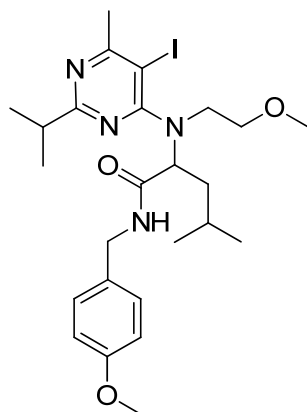

$C_{25}H_{37}IN_4O_3$   
MW = 568.49 g.mol<sup>-1</sup>

**1a**

General procedure using isovaleraldehyde (220  $\mu$ L, 2 mmol), 2-methoxyethylamine (180  $\mu$ L, 2 mmol), *p*-methoxybenzylisocyanide (300  $\mu$ L, 2 mmol) and 5-iodo-2-isopropyl-6-methylpyrimidin-4-ol (560 mg, 2 mmol). Purification by flash column chromatography (silica gel; petroleum ether-diethyl ether, 70:30) gave **1a** as a colorless oil.

**Yield** 64 % (730 mg).

**R<sub>f</sub>** 0.3 (70:30 petroleum ether / diethyl ether).

**<sup>1</sup>H NMR (CDCl<sub>3</sub>, 400 MHz)**  $\delta$  8.61 (t,  $J$  = 5.6 Hz, 1H), 7.30 (d,  $J$  = 8.6 Hz, 2H), 6.86 (d,  $J$  = 8.6 Hz, 2H), 4.62 (dd,  $J$  = 14.3, 6.3 Hz, 1H), 4.50 (dd,  $J$  = 10.7, 4.1 Hz, 1H), 4.25 (dd,  $J$  = 14.3, 4.3 Hz, 1H), 4.13 (d,  $J$  = 13.7 Hz, 1H), 3.80 (s, 3H), 3.50-3.39 (m, 2H), 3.19-3.08 (m, 1H), 3.05-2.93 (m, 1H), 2.98 (s, 3H), 2.67 (s, 3H), 2.00-1.90 (m, 1H), 1.90-1.57 (m, 1H), 1.51-1.38 (m, 1H), 1.24 (d,  $J$  = 7.2 Hz, 3H), 1.22 (d,  $J$  = 7.2 Hz, 3H), 0.83 (d,  $J$  = 6.6 Hz, 3H), 0.49 (d,  $J$  = 6.6 Hz, 3H).

**<sup>13</sup>C NMR (CDCl<sub>3</sub>, 100.6 MHz)**  $\delta$  172.6, 172.3, 171.2, 167.2, 159.2, 131.0, 130.1, 114.2, 83.6, 70.0, 65.0, 59.2, 55.7, 46.1, 43.9, 39.6, 36.9, 30.9, 25.0, 23.9, 22.3, 21.6, 20.9.

**HRMS** Calculated for  $C_{25}H_{37}IN_4O_3$  568.1910, found 568.1885.

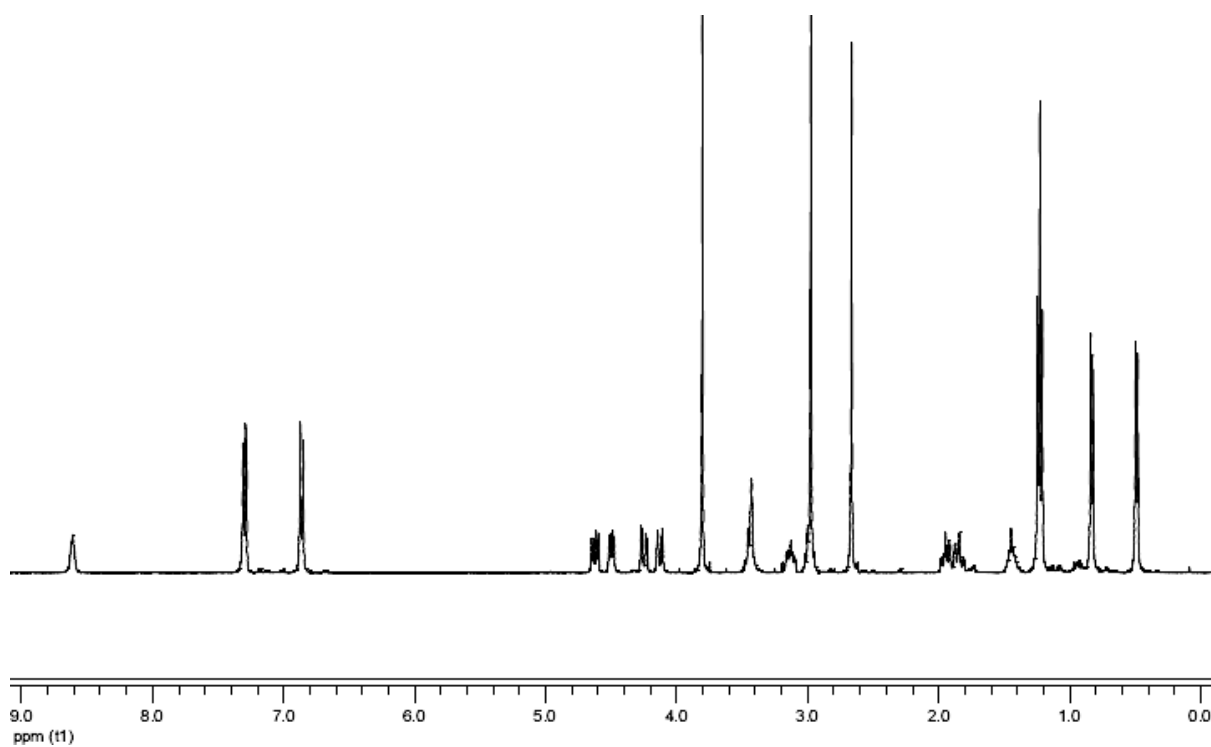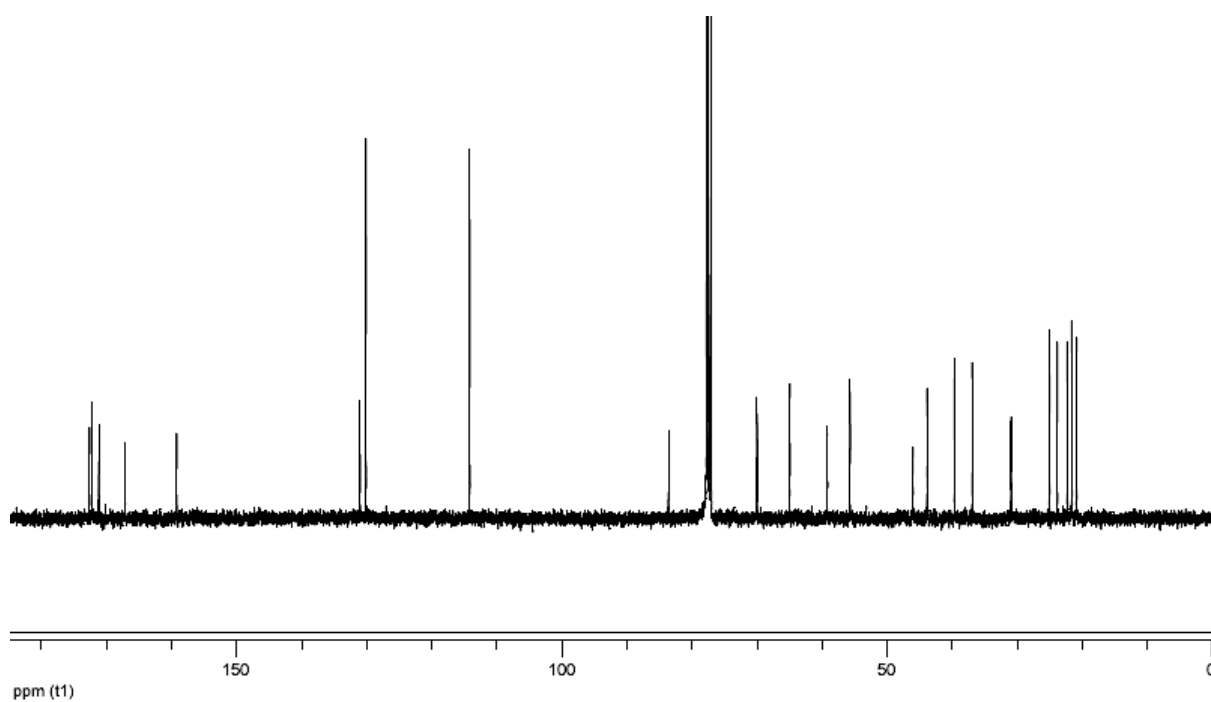

**2-[(4-chlorobenzyl)-(5-iodo-2-isopropyl-6-methylpyrimidin-4-yl)-amino]-4-methylpentanoic acid 4-methoxybenzylamide**

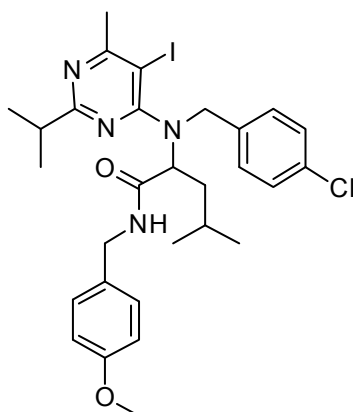

$C_{29}H_{36}ClIN_4O_2$   
MW = 634.98 g.mol<sup>-1</sup>

**1b**

General procedure using isovaleraldehyde (220  $\mu$ L, 2 mmol), *p*-chlorobenzylamine (250  $\mu$ L, 2 mmol), *p*-methoxybenzylisocyanide (300  $\mu$ L, 2 mmol) and 5-iodo-2-isopropyl-6-methylpyrimidin-4-ol (560 mg, 2 mmol). Purification by flash chromatography (petroleum ether-diethyl ether, 70:30) gave **1b** as a colorless oil.

**Yield** 59 % (740 mg).

**R<sub>f</sub>** 0.3 (70:30 petroleum ether / diethyl ether).

**<sup>1</sup>H NMR (CDCl<sub>3</sub>, 400 MHz)**  $\delta$  7.77 (br s, 1H), 7.15-7.08 (m, 4H), 7.00 (d,  $J$  = 7.1 Hz, 2H), 6.81 (d,  $J$  = 8.3 Hz, 2H), 4.97 (d,  $J$  = 15.2 Hz, 1H), 4.51 (dd,  $J$  = 8.3, 6.3 Hz, 1H), 4.34 (dd,  $J$  = 16.2, 5.8 Hz, 1H), 4.31 (dd,  $J$  = 16.2, 5.3 Hz, 1H), 4.25 (d,  $J$  = 15.2 Hz, 1H), 3.80 (s, 3H), 2.86 (sept,  $J$  = 6.8 Hz, 1H), 2.62 (s, 3H), 1.99-1.89 (m, 1H), 1.89-1.79 (m, 1H), 1.68-1.56 (sept,  $J$  = 6.3 Hz, 1H), 1.13 (d,  $J$  = 6.8 Hz, 3H), 1.07 (d,  $J$  = 6.8 Hz, 3H), 0.85 (d,  $J$  = 6.3 Hz, 3H), 0.71 (d,  $J$  = 6.3 Hz, 3H).

**<sup>13</sup>C NMR (CDCl<sub>3</sub>, 100.6 MHz)**  $\delta$  173.0, 171.7, 171.5, 166.6, 159.4, 136.7, 132.9, 130.4, 129.8, 129.5, 128.7, 114.4, 85.5, 63.7, 55.7, 50.4, 43.7, 38.2, 36.9, 30.7, 25.3, 23.4, 22.1, 22.0, 21.7.

**I.R.** (thin film) 1654, 1612, 1560, 1513 cm<sup>-1</sup>.

**HRMS** Calculated for C<sub>29</sub>H<sub>36</sub>ClIN<sub>4</sub>O<sub>2</sub> 634.1572, found 634.1573.

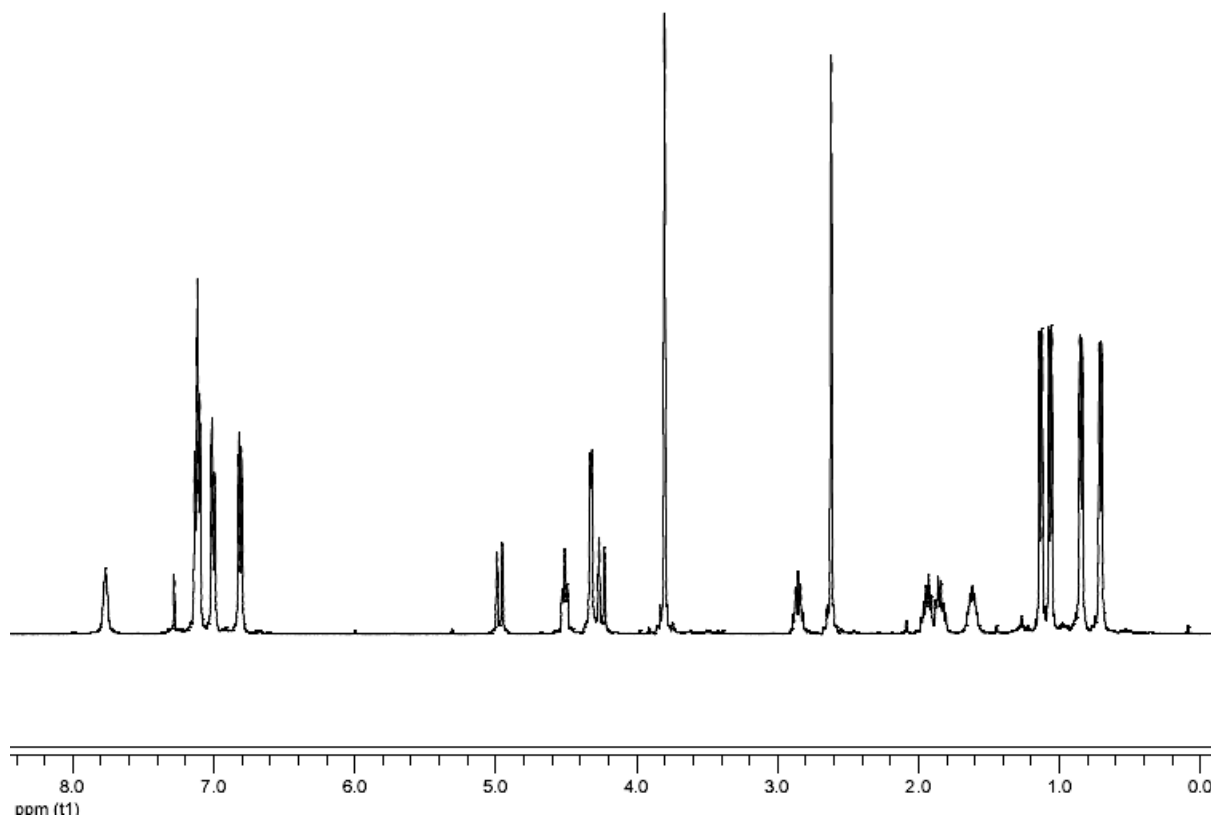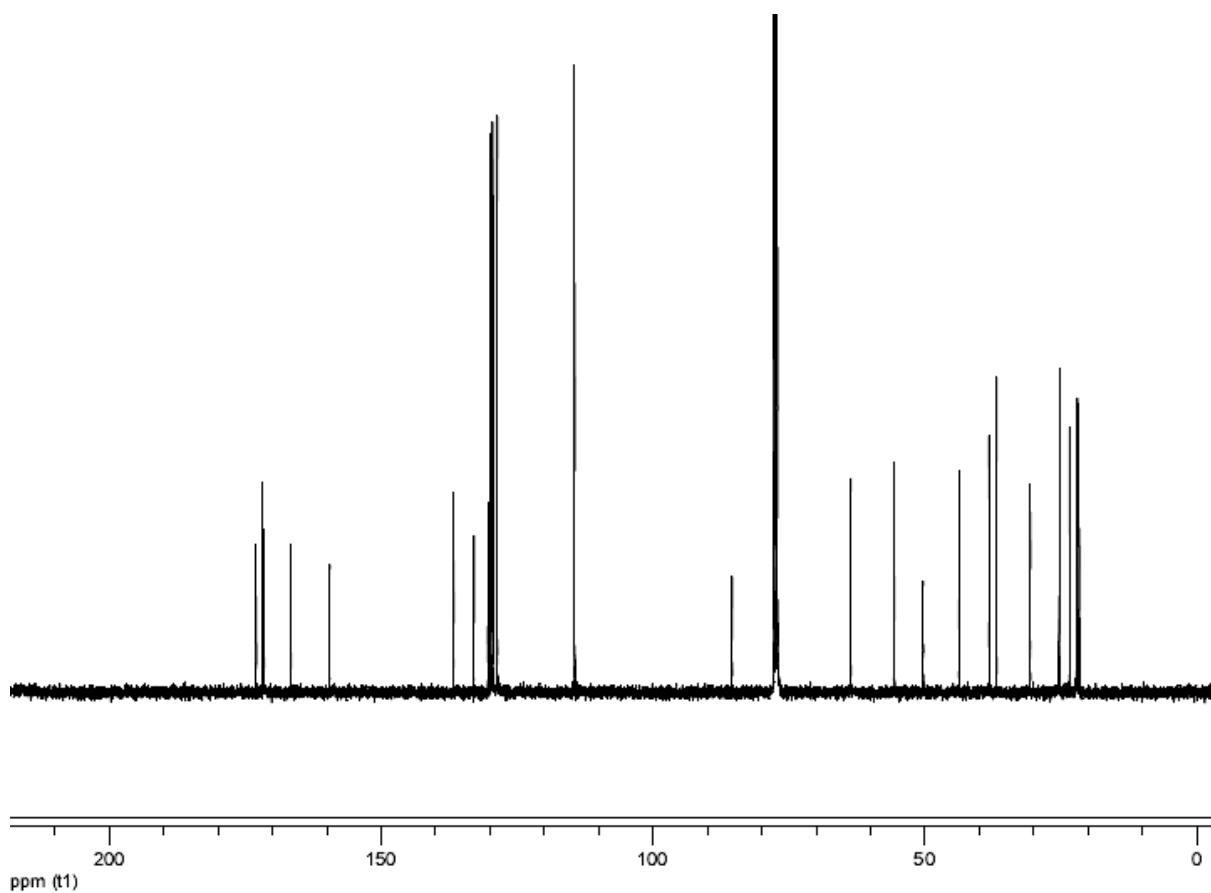

**2-[(4-chlorobenzyl)-(5-iodo-2-isopropyl-6-methylpyrimidin-4-yl)-amino]-4-methylpentanoic acid 4-chlorobenzylamide**

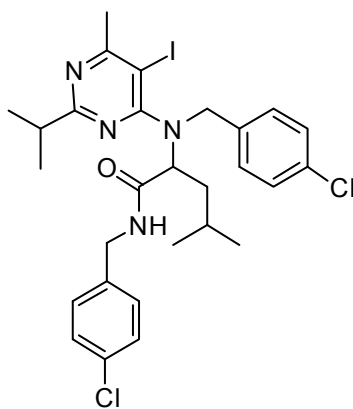

$C_{28}H_{33}Cl_2IN_4O$   
MW = 639.40 g.mol<sup>-1</sup>

**1c**

General procedure using isovaleraldehyde (220  $\mu$ L, 2 mmol), *p*-chlorobenzylamine (250  $\mu$ L, 2 mmol), *p*-chlorobenzylisocyanide (260  $\mu$ L, 2 mmol) and 5-iodo-2-isopropyl-6-methylpyrimidin-4-ol (560 mg, 2 mmol). Purification by flash chromatography (petroleum ether-diethyl ether, 70:30) gave **1c** as a colorless oil.

**Yield** 69 % (885 mg).

**R<sub>f</sub>** 0.3 (70:30 petroleum ether / diethyl ether).

**<sup>1</sup>H NMR (CDCl<sub>3</sub>, 400 MHz)**  $\delta$  7.95 (t,  $J$  = 5.3 Hz, 1H), 7.23 (d,  $J$  = 8.4 Hz, 2H), 7.12 (d,  $J$  = 8.5 Hz, 2H), 7.11 (d,  $J$  = 8.5 Hz, 2H), 7.00 (d,  $J$  = 8.4 Hz, 2H), 4.96 (d,  $J$  = 15.3 Hz, 1H), 4.45 (dd,  $J$  = 8.4, 6.2 Hz, 1H), 4.37-4.22 (m, 3H), 2.85 (sept,  $J$  = 6.9 Hz, 1H), 2.62 (s, 3H), 1.98-1.79 (m, 2H), 1.67-1.55 (m, 1H), 1.12 (d,  $J$  = 6.9 Hz, 3H), 1.06 (d,  $J$  = 6.9 Hz, 3H), 0.84 (d,  $J$  = 6.6 Hz, 3H), 0.71 (d,  $J$  = 6.6 Hz, 3H).

**<sup>13</sup>C NMR (CDCl<sub>3</sub>, 100.6 MHz)**  $\delta$  173.0, 172.1, 171.7, 166.6, 137.0, 136.6, 133.7, 133.1, 129.8, 129.5, 129.2, 128.7, 85.7, 63.7, 50.7, 43.4, 38.3, 36.9, 30.7, 25.3, 23.4, 22.2, 22.0, 21.7.

**I.R.** (thin film) 1667, 1533, 1512, 1492 cm<sup>-1</sup>.

**HRMS** Calculated for C<sub>28</sub>H<sub>33</sub>Cl<sub>2</sub>IN<sub>4</sub>O 638.1076, found 638.1086.



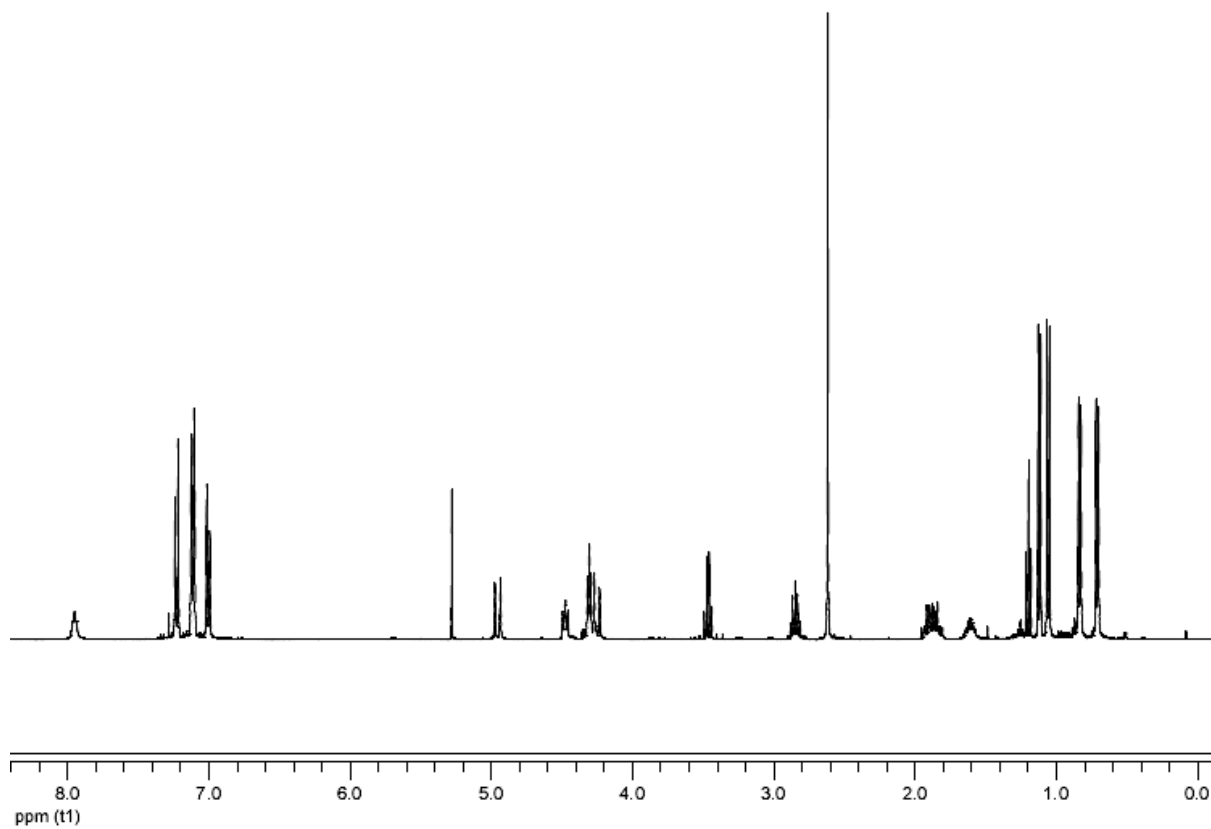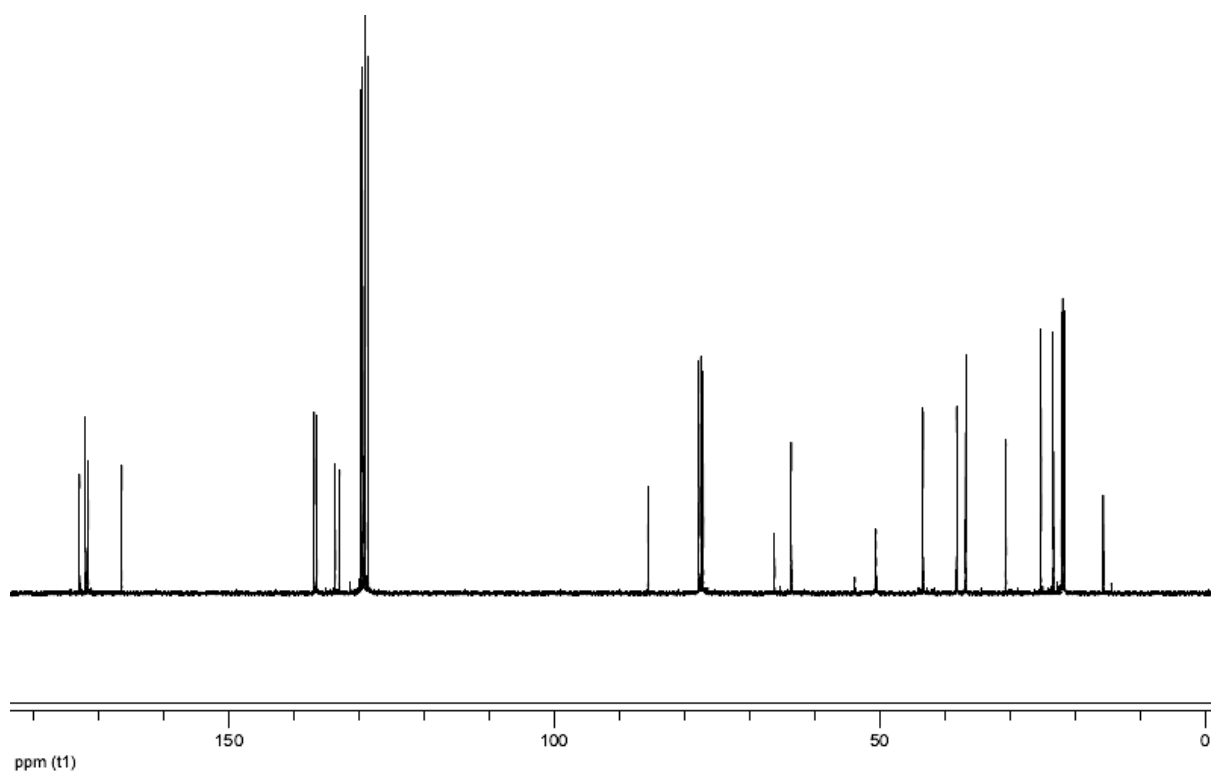

**2-((4-chlorobenzyl)-(5-iodo-2-isopropyl-6-methylpyrimidin-4-yl)-amino)-*N*-cyclohexyl-4-methylpentanamide**

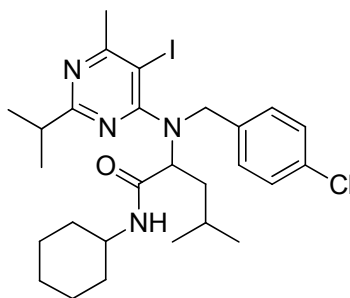

$C_{27}H_{38}ClIN_4O$   
MW = 596.97 g.mol<sup>-1</sup>

**1d**

General procedure using isovaleraldehyde (220  $\mu$ L, 2 mmol), *p*-chlorobenzylamine (250  $\mu$ L, 2 mmol), cyclohexylbenzylisocyanide (260  $\mu$ L, 2 mmol) and 5-iodo-2-isopropyl-6-methylpyrimidin-4-ol (560 mg, 2 mmol). Purification by flash chromatography (petroleum ether-diethyl ether, 80:20) gave **1d** as a colorless oil.

**Yield** 22 % (263 mg).

**R<sub>f</sub>** 0.3 (80:20 petroleum ether / diethyl ether).

**<sup>1</sup>H NMR (CDCl<sub>3</sub>, 400 MHz)**  $\delta$  7.22-7.16 (m, 1H), 7.19 (d,  $J$  = 8.5 Hz, 2H), 7.13 (d,  $J$  = 8.5 Hz, 2H), 4.98 (d,  $J$  = 15.2 Hz, 1H), 4.48 (dd,  $J$  = 8.0, 6.2 Hz, 1H), 4.19 (d,  $J$  = 15.2 Hz, 1H), 3.83-3.71 (m, 1H), 2.96 (sept,  $J$  = 6.9 Hz, 1H), 2.65 (s, 3H), 2.02- 1.92 (m, 2H), 1.82-1.68 (m, 3H), 1.68-1.52 (m, 3H), 1.45-1.25 (m, 2H), 1.22 (d,  $J$  = 6.9 Hz, 3H), 1.21-1.14 (m, 2H), 1.12 (d,  $J$  = 6.9 Hz, 3H), 1.08-0.94 (m, 1H), 0.82 (d,  $J$  = 6.6 Hz, 3H), 0.67 (d,  $J$  = 6.6 Hz, 3H).

**<sup>13</sup>C NMR (CDCl<sub>3</sub>, 100.6 MHz)**  $\delta$  173.1, 171.4, 170.6, 166.8, 137.2, 132.8, 129.8, 128.7, 85.8, 63.9, 49.7, 48.7, 38.1, 37.0, 33.6, 33.5, 25.9, 25.4, 25.2, 25.1, 23.3, 22.2, 22.1, 21.7.

**I.R.** (thin film) 1661, 1533, 1507, 1449 cm<sup>-1</sup>.

**HRMS** Calculated for C<sub>27</sub>H<sub>38</sub>ClIN<sub>4</sub>O 596.1779, found 596.1769.

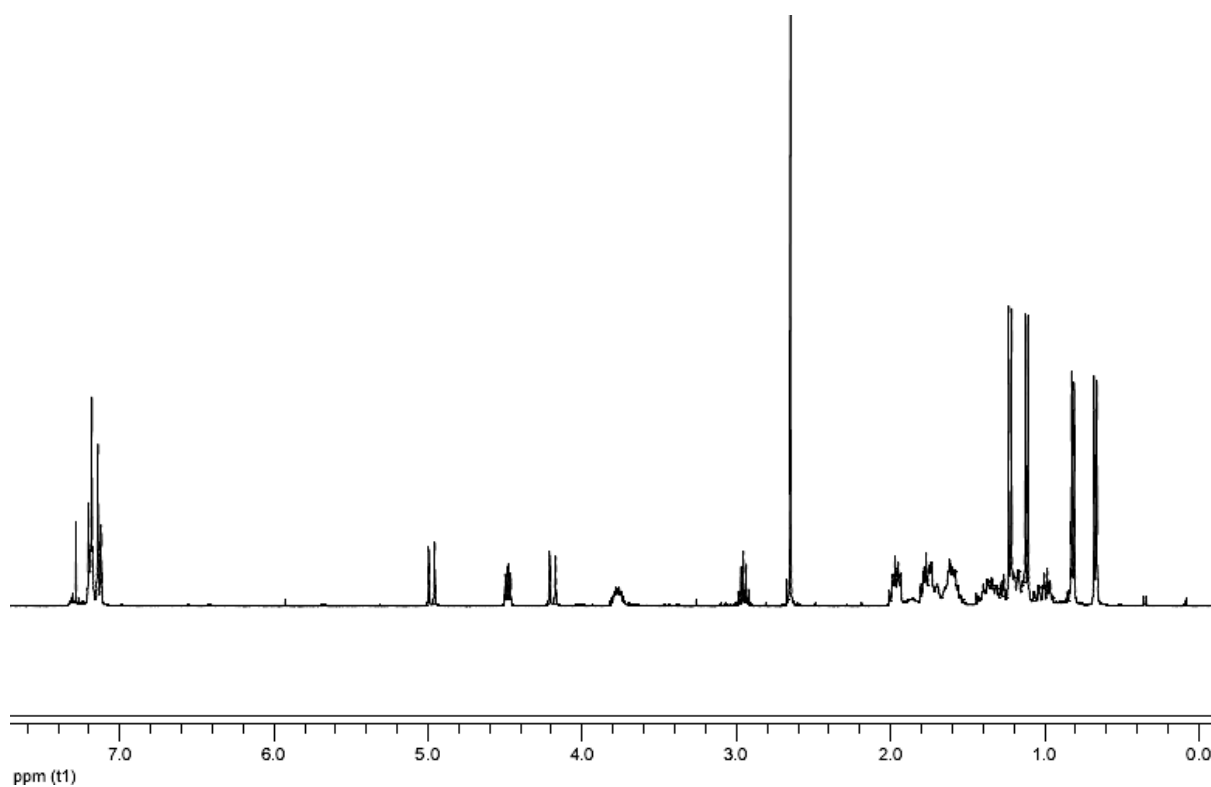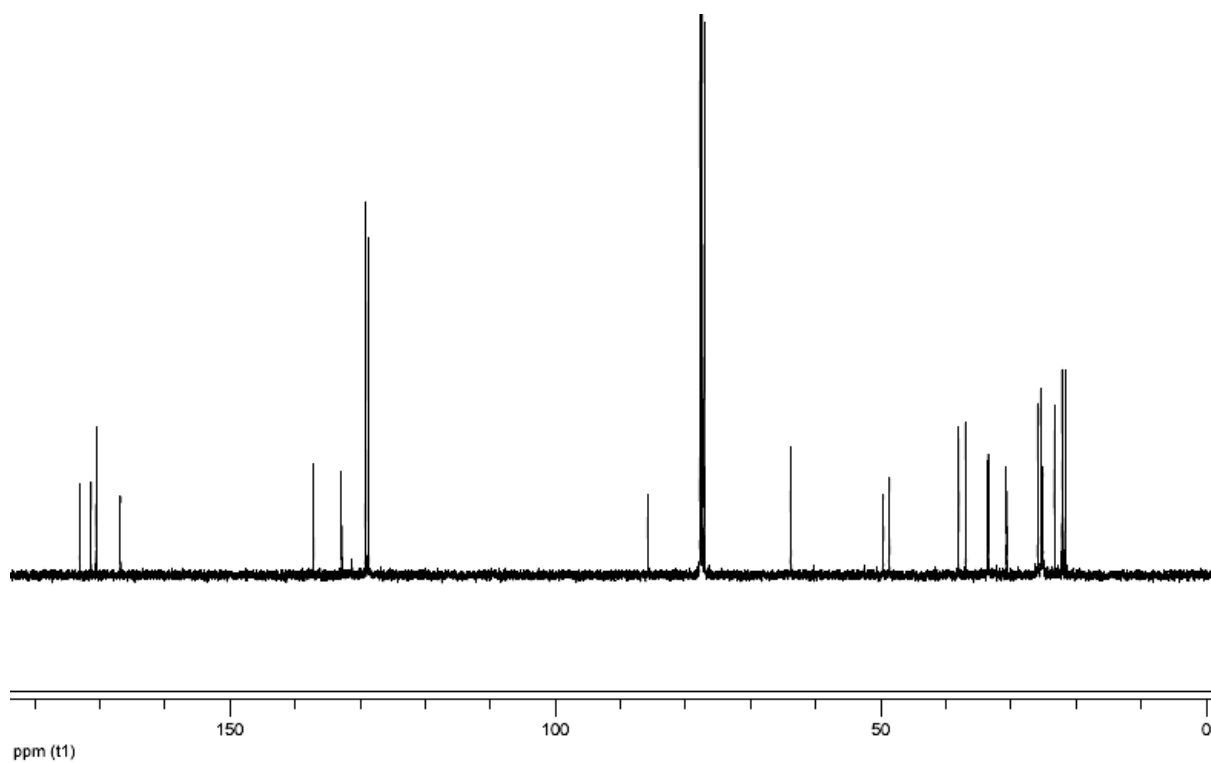

**2-((4-chlorobenzyl)-(5-iodo-6-methyl-2-phenylpyrimidin-4-yl)-amino)-N-(4-methoxybenzyl)-4-methylpentanamide**

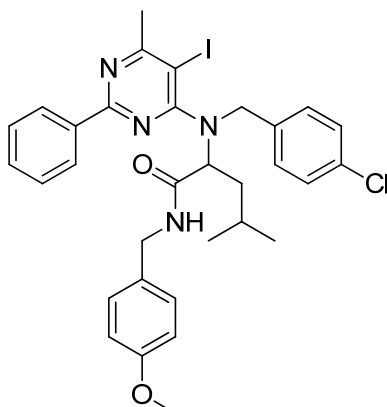

$C_{32}H_{34}ClIN_4O_2$   
MW = 669.00 g.mol<sup>-1</sup>

**1e**

General procedure using isovaleraldehyde (220  $\mu$ L, 2 mmol), *p*-chlorobenzylamine (250  $\mu$ L, 2 mmol), *p*-methoxybenzylisocyanide (300  $\mu$ L, 2 mmol) and 5-iodo-2-phenyl-6-methylpyrimidin-4-ol (640 mg, 2 mmol). Purification by flash chromatography (petroleum ether-diethyl ether, 70:30) gave **1e** as a colorless oil.

**Yield** 68 % (910 mg).

**R<sub>f</sub>** 0.3 (70:30 petroleum ether / diethyl ether).

**<sup>1</sup>H NMR (CDCl<sub>3</sub>, 400 MHz)**  $\delta$  8.24 (d,  $J$  = 7.2 Hz, 2H), 7.53 (t,  $J$  = 5.3 Hz, 1H), 7.48 (t,  $J$  = 7.2 Hz, 1H), 7.44-7.39 (m, 2H), 7.11 (d,  $J$  = 8.7 Hz, 2H), 7.07 (d,  $J$  = 8.7 Hz, 2H), 7.04 (d,  $J$  = 8.6 Hz, 2H), 6.69 (d,  $J$  = 8.6 Hz, 2H), 5.09 (d,  $J$  = 15.4 Hz, 1H), 4.66 (t,  $J$  = 7.2 Hz, 1H), 4.39 (d,  $J$  = 15.4 Hz, 1H), 4.36-4.26 (m, 2H), 3.77 (s, 3H), 2.74 (s, 3H), 2.11-2.02 (m, 1H), 1.94-1.84 (m, 1H), 1.76-1.64 (m, 1H), 0.89 (d,  $J$  = 6.6 Hz, 3H), 0.78 (d,  $J$  = 6.6 Hz, 3H).

**<sup>13</sup>C NMR (CDCl<sub>3</sub>, 100.6 MHz)**  $\delta$  172.0, 171.5, 166.6, 162.1, 159.3, 136.8, 133.0, 131.3, 131.3, 130.2, 129.6, 129.3, 129.0, 128.8, 128.4, 114.4, 85.8, 63.7, 55.6, 50.1, 43.7, 38.3, 30.9, 25.5, 23.3, 22.4.

**I.R.** (thin film) 1656, 1510, 1428, 1371 cm<sup>-1</sup>.

**HRMS** Calculated for C<sub>32</sub>H<sub>34</sub>ClIN<sub>4</sub>O<sub>2</sub> 668.1415, found 668.1406.

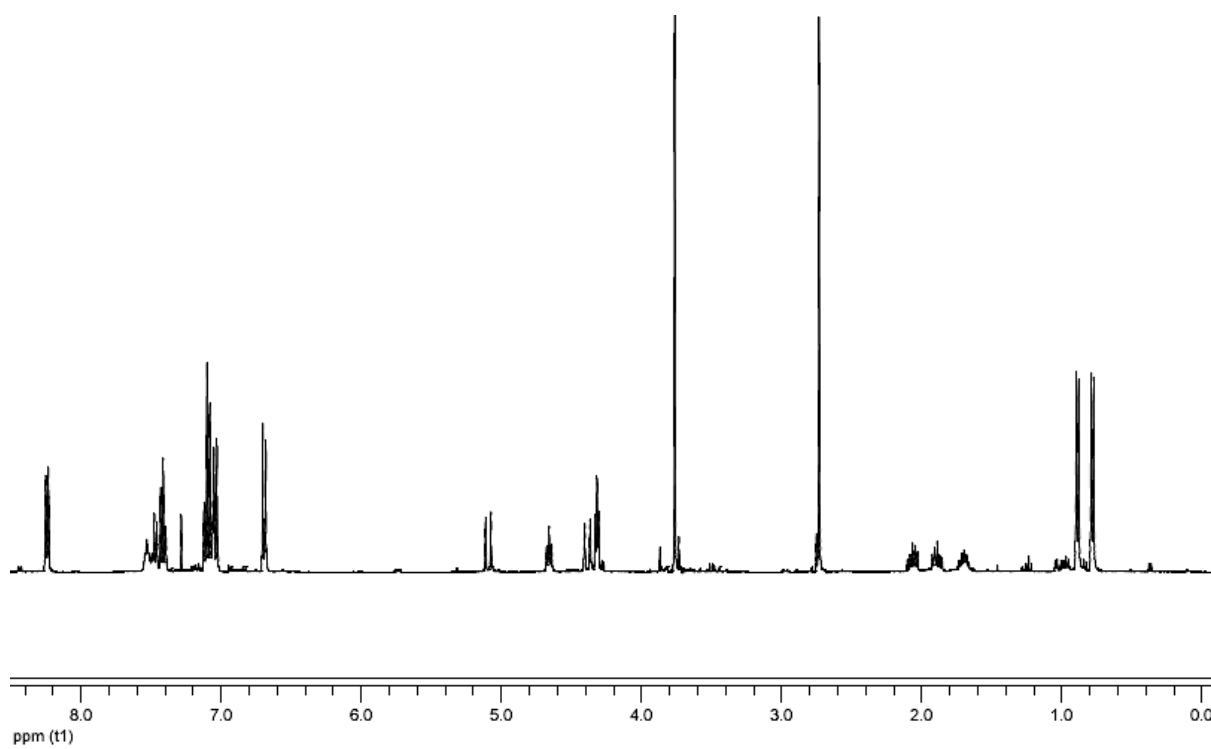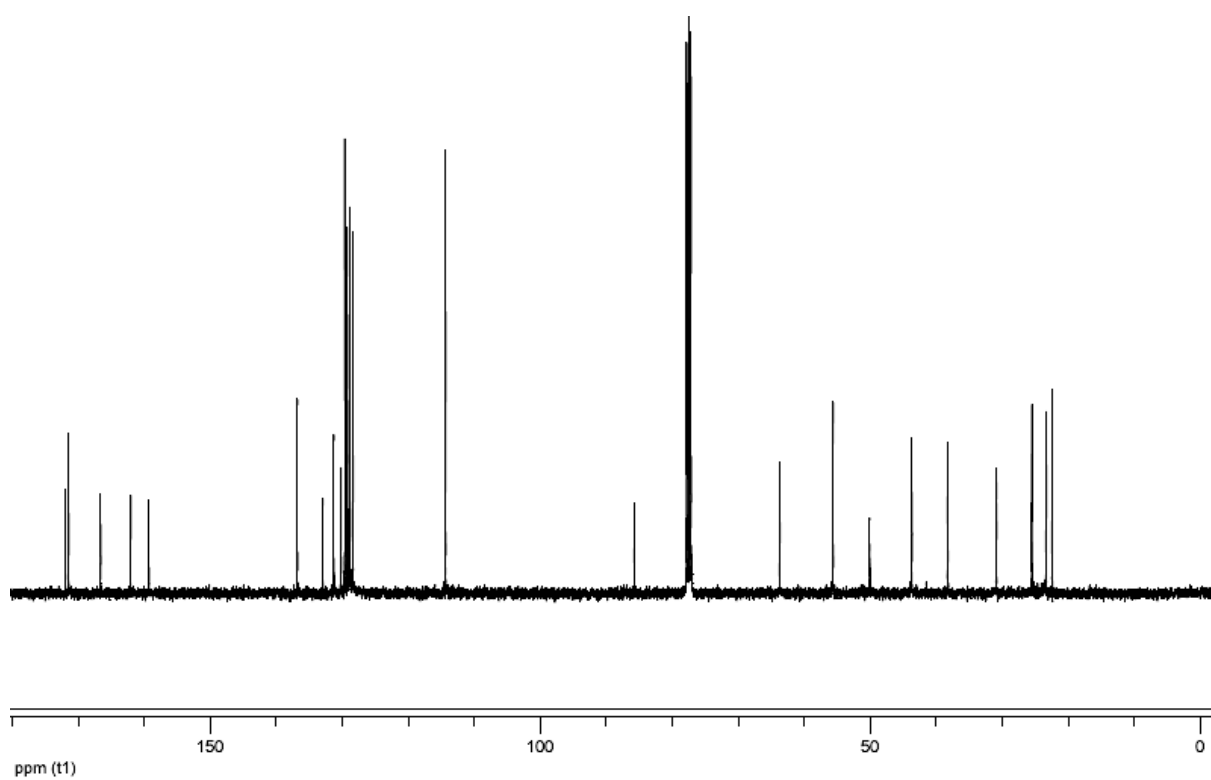

**2-((4-chlorobenzyl)-(5-iodo-2-isopropyl-6-methylpyrimidin-4-yl)-amino)-N-(4-methoxybenzyl)-propanamide**

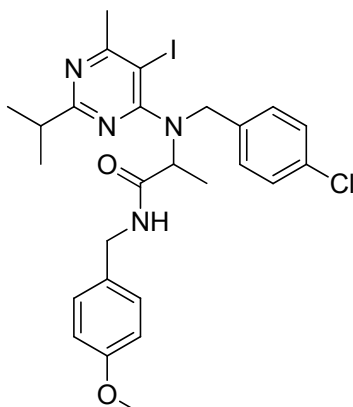

$C_{26}H_{30}ClIN_4O_2$   
MW = 592.9 g.mol<sup>-1</sup>

**1f**

General procedure using acetaldehyde (110  $\mu$ L, 2 mmol), *p*-chlorobenzylamine (250  $\mu$ L, 2 mmol), *p*-methoxybenzylisocyanide (300  $\mu$ L, 2 mmol) and 5-iodo-2-isopropyl-6-methylpyrimidin-4-ol (560 mg, 2 mmol). Purification by flash chromatography (petroleum ether-diethyl ether, 70:30) gave **1f** as a colorless oil.

**Yield** 57 % (675 mg).

**R<sub>f</sub>** 0.3 (70:30 petroleum ether / diethyl ether).

**<sup>1</sup>H NMR (CDCl<sub>3</sub>, 400 MHz)**  $\delta$  7.34 (t,  $J$  = 5.3 Hz, 1H), 7.19-7.11 (m, 4H), 7.07 (d,  $J$  = 8.5 Hz, 2H), 6.83 (d,  $J$  = 8.5 Hz, 2H), 4.69 (d,  $J$  = 14.8 Hz, 1H), 4.49-4.42 (m, 2H), 4.36 (dd,  $J$  = 14.4, 5.2 Hz, 1H), 4.27 (d,  $J$  = 14.8 Hz, 1H), 3.80 (s, 3H), 2.91 (sept,  $J$  = 6.9 Hz, 1H), 2.63 (s, 3H), 1.51 (d,  $J$  = 7.0 Hz, 3H), 1.16 (d,  $J$  = 6.9 Hz, 3H), 1.10 (d,  $J$  = 6.9 Hz, 3H).

**<sup>13</sup>C NMR (CDCl<sub>3</sub>, 100.6 MHz)**  $\delta$  173.5, 171.9, 171.7, 167.2, 159.5, 137.1, 133.0, 130.4, 129.7, 129.5, 128.7, 114.5, 88.5, 61.8, 55.7, 49.6, 43.8, 36.9, 30.5, 22.0, 21.8, 13.9.

**I.R.** (thin film) 1667, 1538, 1512, 1444 cm<sup>-1</sup>.

**HRMS** Calculated for C<sub>26</sub>H<sub>30</sub>ClIN<sub>4</sub>O<sub>2</sub> 592.1102, found 592.1095.

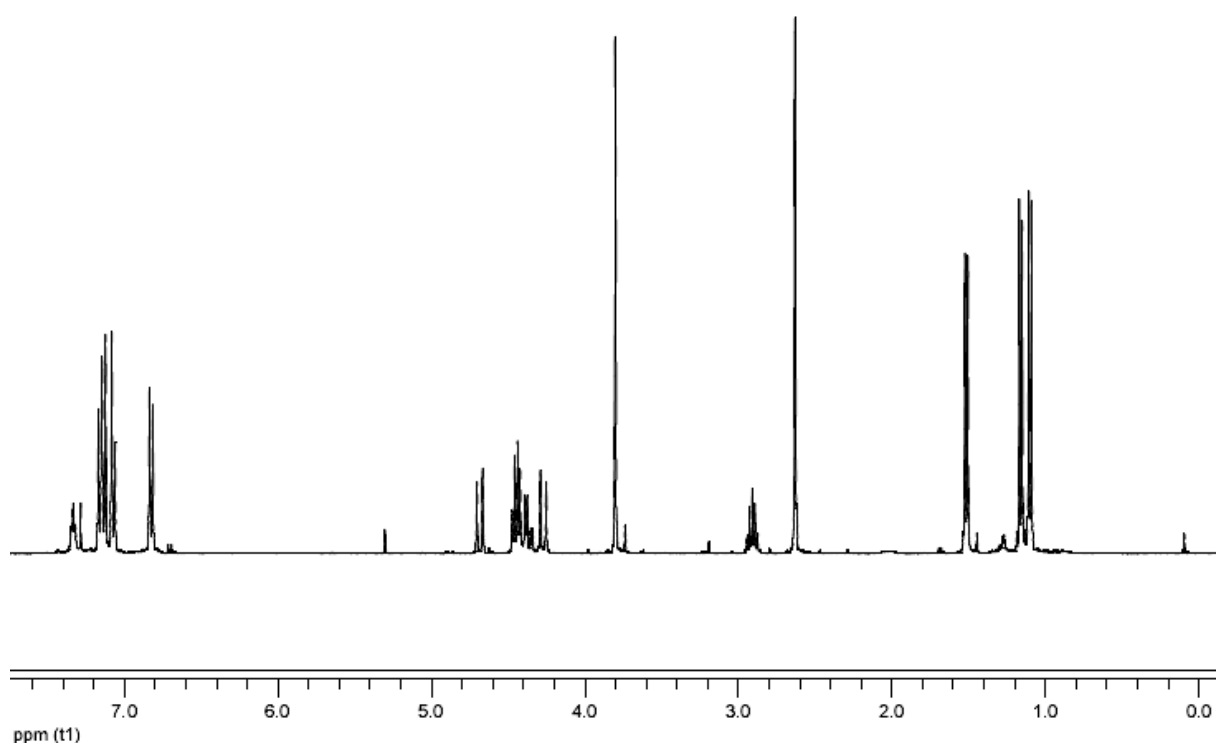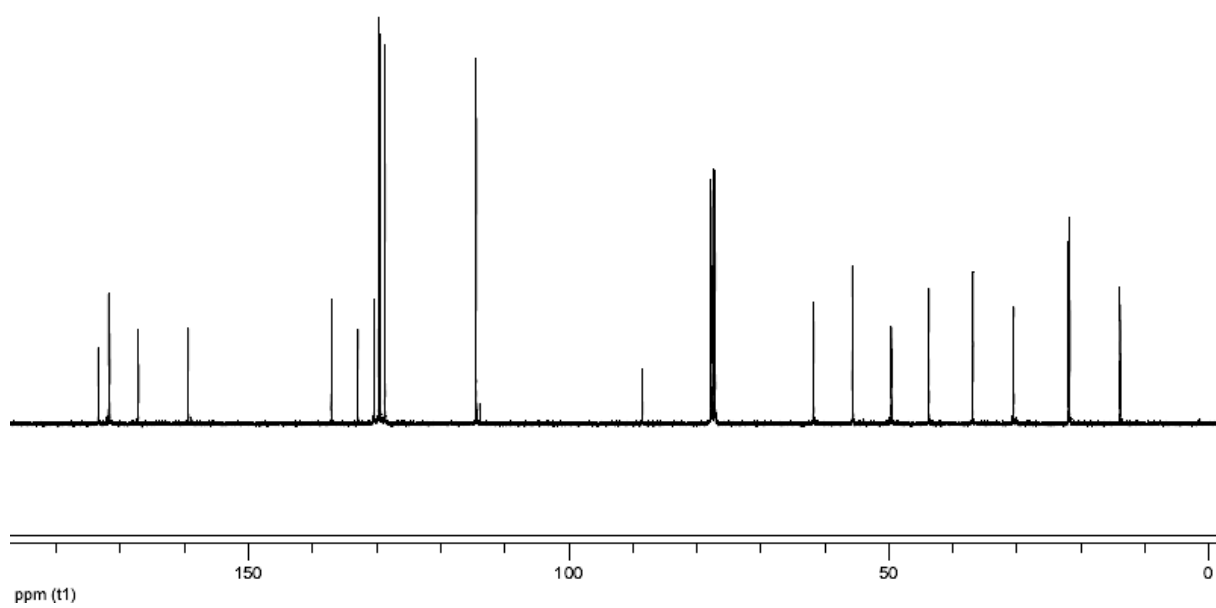

**2-((4-chlorobenzyl)-(5-iodo-2-isopropyl-6-methylpyrimidin-4-yl)-amino)-N-(4-methoxybenzyl)-4-phenylbutanamide**

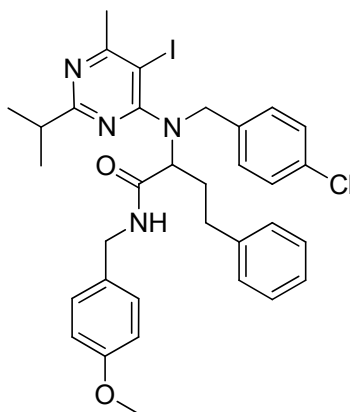

$C_{33}H_{36}ClIN_4O_2$   
MW = 683.02 g.mol<sup>-1</sup>

**1g**

General procedure using 3-phenylpropionaldehyde (260  $\mu$ L, 2 mmol), *p*-chlorobenzylamine (250  $\mu$ L, 2 mmol), *p*-methoxybenzylisocyanide (300  $\mu$ L, 2 mmol) and 5-iodo-2-isopropyl-6-methylpyrimidin-4-ol (560 mg, 2 mmol). Purification by flash chromatography (petroleum ether-diethyl ether, 80:20) gave **1g** as a colorless oil.

**Yield** 51 % (695 mg).

**R<sub>f</sub>** 0.3 (80:20 petroleum ether / diethyl ether).

**<sup>1</sup>H NMR (CDCl<sub>3</sub>, 400 MHz)**  $\delta$  7.64 (t,  $J$  = 5.2 Hz, 1H), 7.21-7.08 (m, 7H), 7.00 (d,  $J$  = 8.4 Hz, 2H), 6.97 (d,  $J$  = 8.0 Hz, 2H), 6.82 (d,  $J$  = 8.6 Hz, 2H), 5.00 (d,  $J$  = 15.1 Hz, 1H), 4.42-4.34 (m, 3H), 4.22 (d,  $J$  = 15.1 Hz, 1H), 3.81 (s, 3H), 2.89 (sept,  $J$  = 6.9 Hz, 1H), 2.77-2.65 (m, 2H), 2.65-2.56 (m, 1H), 2.56 (s, 3H), 2.22-2.11 (m, 1H), 1.18 (d,  $J$  = 6.9 Hz, 3H), 1.07 (d,  $J$  = 6.9 Hz, 3H).

**<sup>13</sup>C NMR (CDCl<sub>3</sub>, 100.6 MHz)**  $\delta$  173.0, 171.5, 171.4, 166.4, 159.5, 141.2, 136.7, 132.9, 130.3, 129.8, 129.4, 128.8, 128.7, 126.4, 114.5, 86.3, 64.2, 55.7, 50.0, 43.8, 36.9, 33.1, 30.6, 30.4, 22.2, 21.7.

**I.R.** (thin film) 1673, 1533, 1512, 1454 cm<sup>-1</sup>.

**HRMS** Calculated for C<sub>33</sub>H<sub>36</sub>ClIN<sub>4</sub>O<sub>2</sub> 682.1572, found 682.1535.



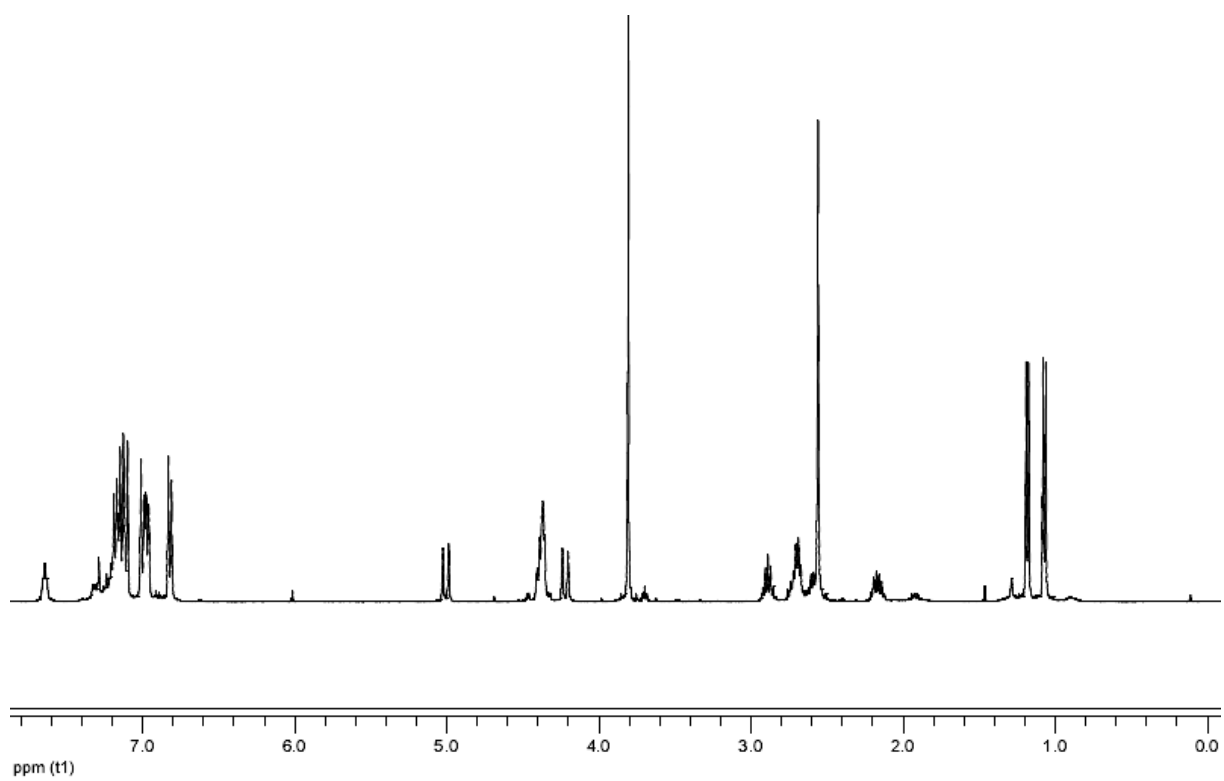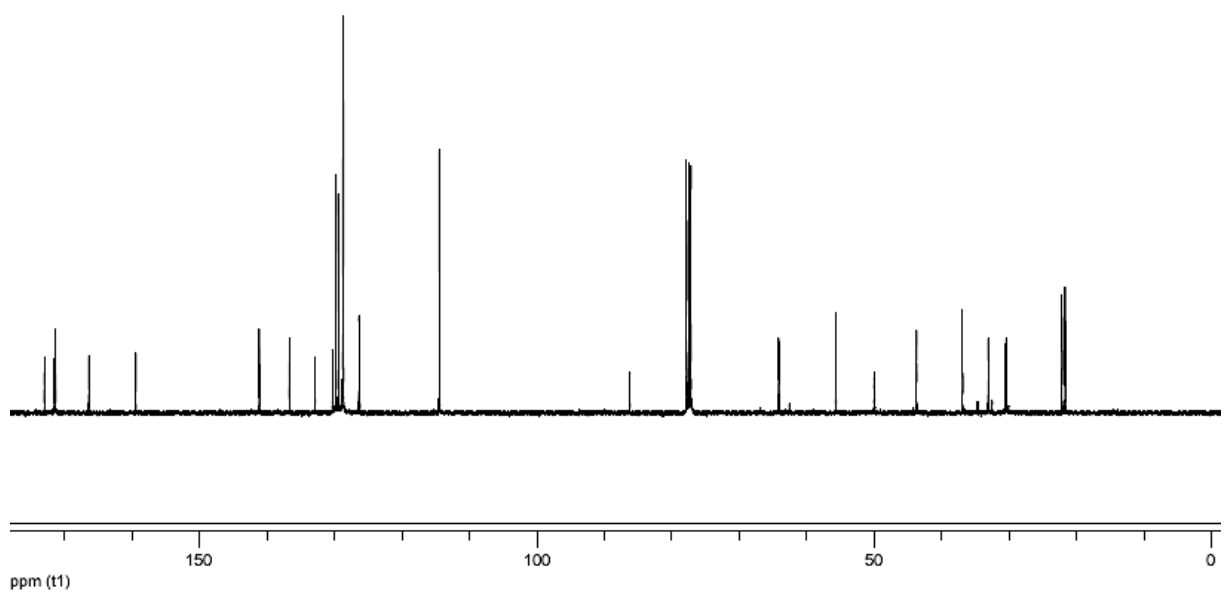

**2-((4-chlorobenzyl)-(5-iodo-2-isopropyl-6-methylpyrimidin-4-yl)-amino)-N-(4-methoxybenzyl)-3-methylbutanamide**

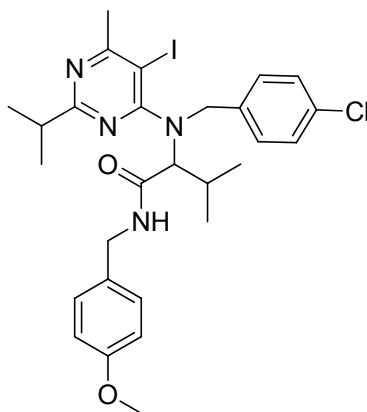

$C_{28}H_{34}ClIN_4O_2$   
MW = 620.95 g.mol<sup>-1</sup>

**1h**

General procedure using isobutyraldehyde (200  $\mu$ L, 2 mmol), *p*-chlorobenzylamine (250  $\mu$ L, 2 mmol), *p*-methoxybenzylisocyanide (300  $\mu$ L, 2 mmol) and 5-iodo-2-isopropyl-6-methylpyrimidin-4-ol (560 mg, 2 mmol). Purification by flash chromatography (petroleum ether-diethyl ether, 70:30) gave **1h** as a colorless oil.

**Yield** 42 % (522 mg).

**R<sub>f</sub>** 0.3 (70:30 petroleum ether / diethyl ether).

**<sup>1</sup>H NMR (CDCl<sub>3</sub>, 400 MHz)**  $\delta$  8.28 (br s, 1H), 7.15 (d,  $J$  = 8.6 Hz, 2H), 7.10 (d,  $J$  = 8.4 Hz, 2H), 6.99 (d,  $J$  = 8.4 Hz, 2H), 6.85 (d,  $J$  = 8.6 Hz, 2H), 5.08 (d,  $J$  = 16.2 Hz, 1H), 4.69 (d,  $J$  = 16.2 Hz, 1H), 4.32 (dd,  $J$  = 14.7, 5.8 Hz, 1H), 4.28 (dd,  $J$  = 14.7, 5.6 Hz, 1H), 4.09 (d,  $J$  = 10.9 Hz, 1H), 3.81 (s, 3H), 2.79 (sept,  $J$  = 6.9 Hz, 1H), 2.57 (s, 3H), 2.56-2.49 (m, 1H), 1.11 (d,  $J$  = 6.9 Hz, 6H), 1.02 (d,  $J$  = 6.6 Hz, 3H), 0.99 (d,  $J$  = 6.6 Hz, 3H).

**<sup>13</sup>C NMR (CDCl<sub>3</sub>, 100.6 MHz)**  $\delta$  172.6, 171.6, 171.1, 165.9, 159.4, 136.3, 132.9, 130.6, 130.0, 129.8, 128.6, 114.4, 83.1, 71.2, 55.7, 51.1, 43.4, 36.9, 30.8, 28.2, 21.9, 20.7, 20.3.

**I.R.** (thin film) 1672, 1534, 1512, 1468 cm<sup>-1</sup>.

**HRMS** Calculated for C<sub>28</sub>H<sub>34</sub>ClIN<sub>4</sub>O<sub>2</sub> 620.1415, found 620.1418.

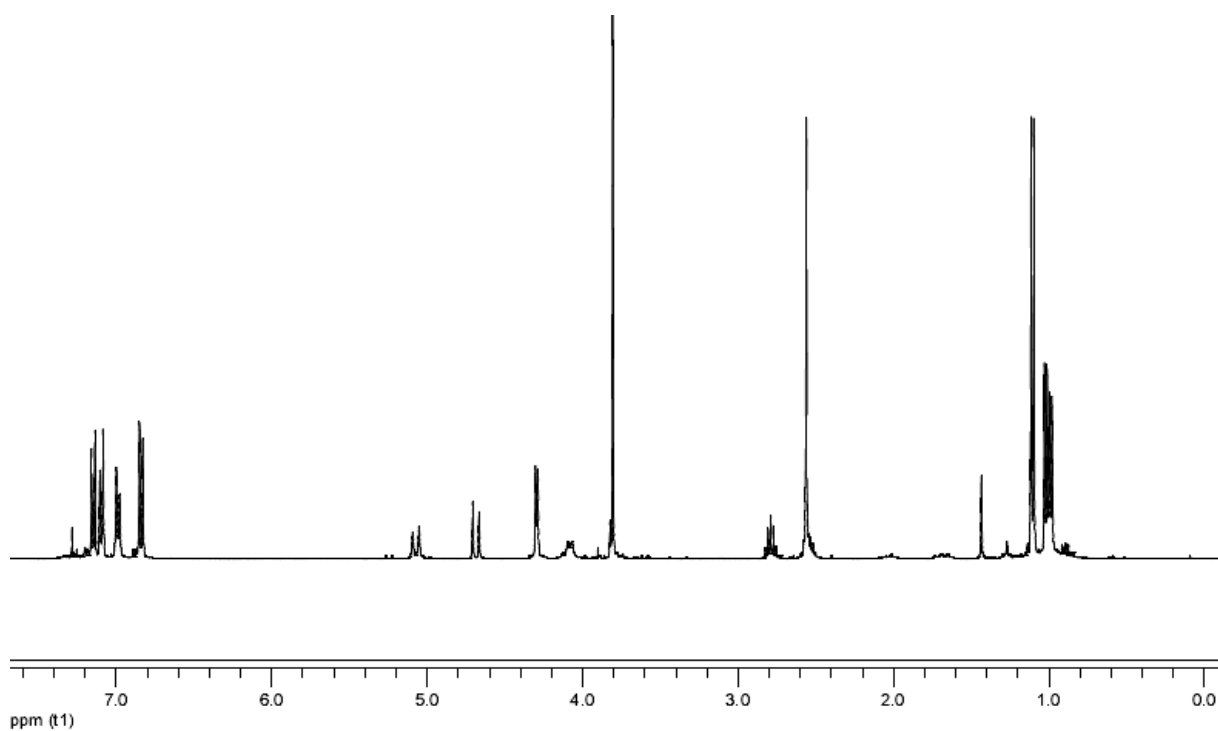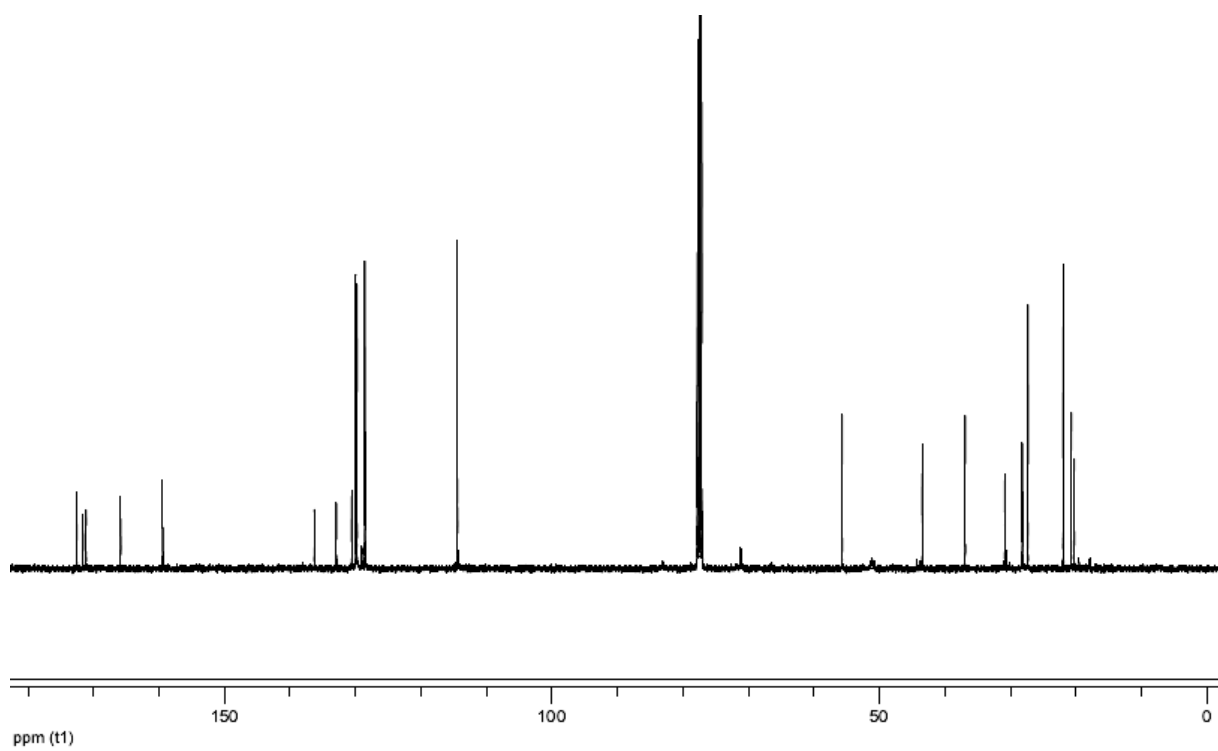

**2-[benzyl-(5-iodo-2-isopropyl-6-methylpyrimidin-4-yl)-amino]-*N*-(4-methoxybenzyl)-4-phenylbutyramide**

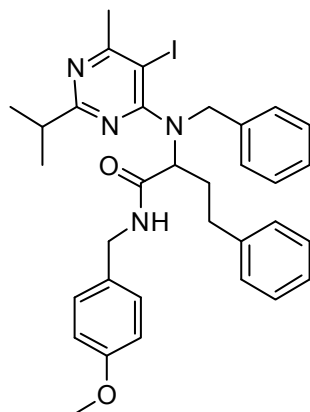

$C_{33}H_{37}IN_4O_2$   
MW = 648.58 g.mol<sup>-1</sup>

**1i**

General procedure using 3-phenylpropionaldehyde (260  $\mu$ L, 2 mmol), benzylamine (220  $\mu$ L, 2 mmol), *p*-methoxybenzylisocyanide (300  $\mu$ L, 2 mmol) and 5-iodo-2-isopropyl-6-methylpyrimidin-4-ol (560 mg, 2 mmol). Purification by flash chromatography (petroleum ether-diethyl ether, 80:20) gave **1i** as a colorless oil.

**Yield** 51 % (660 mg).

**R<sub>f</sub>** 0.3 (80:20 petroleum ether / diethyl ether).

**<sup>1</sup>H NMR (CDCl<sub>3</sub>, 400 MHz)**  $\delta$  7.75 (t, *J* = 5.2 Hz, 1H), 7.22-7.06 (m, 10H), 6.98 (d, *J* = 8.0 Hz, 2H), 6.81 (d, *J* = 8.6 Hz, 2H), 5.06 (d, *J* = 15.1 Hz, 1H), 4.45-4.36 (m, 2H), 4.33-4.26 (m, 2H), 3.80 (s, 3H), 2.87 (sept, *J* = 6.9 Hz, 1H), 2.79-2.58 (m, 3H), 2.57 (s, 3H), 2.27-2.16 (m, 1H), 1.17 (d, *J* = 6.9 Hz, 3H), 1.04 (d, *J* = 6.9 Hz, 3H).

**<sup>13</sup>C NMR (CDCl<sub>3</sub>, 100.6 MHz)**  $\delta$  172.9, 171.6, 171.3, 166.6, 159.4, 141.3, 138.1, 130.4, 129.8, 128.7, 128.6, 128.1, 127.3, 126.3, 114.4, 86.2, 64.2, 55.7, 50.9, 43.7, 36.9, 33.2, 30.6, 30.5, 22.2, 21.6.

**I.R.** (thin film) 1672, 1534, 1510, 1454 cm<sup>-1</sup>.

**HRMS** Calculated for C<sub>33</sub>H<sub>37</sub>IN<sub>4</sub>O<sub>2</sub> 648.1961, found 648.1935.

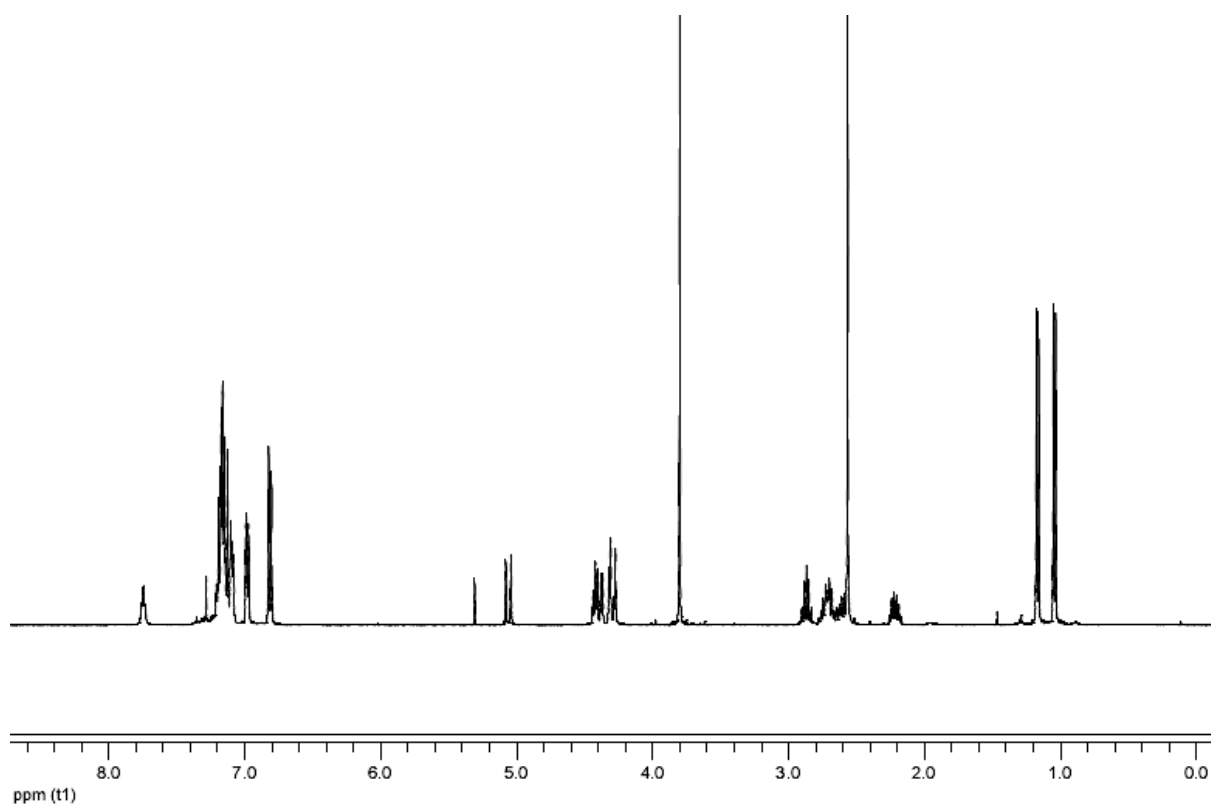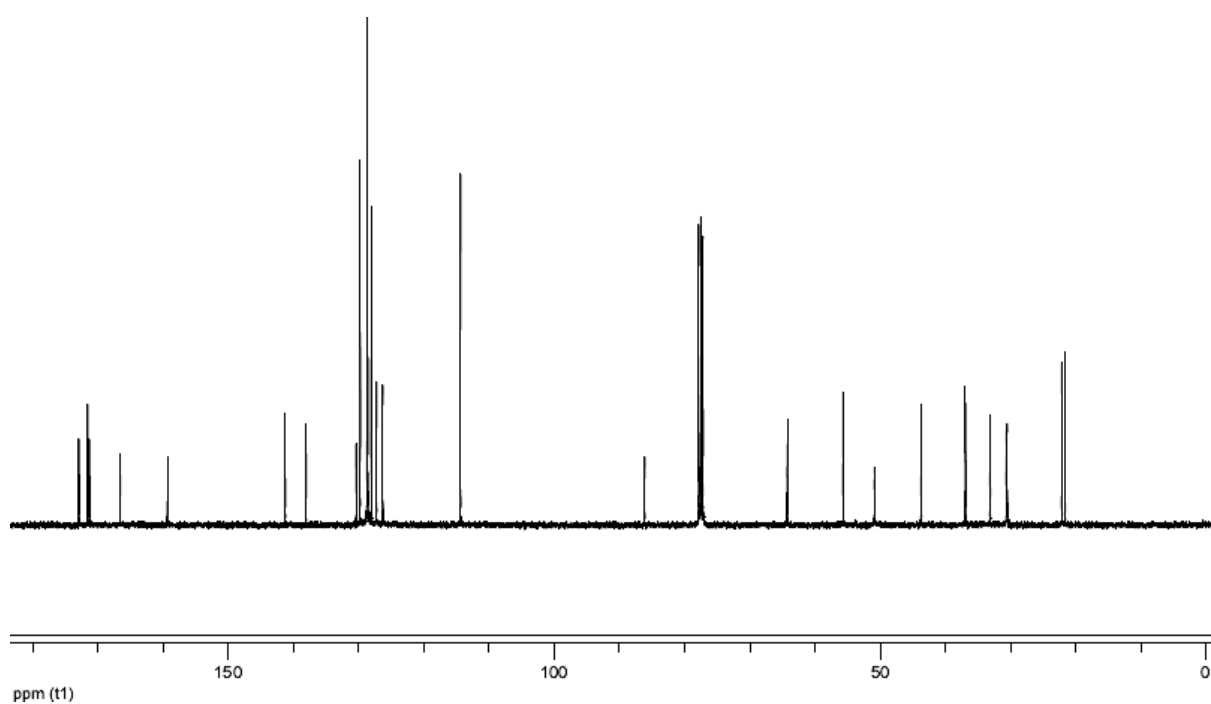

**2-(benzyl-(5-iodo-2-isopropyl-6-methylpyrimidin-4-yl)-amino)-*N*-(4-methoxybenzyl)-4-methylpentanamide**

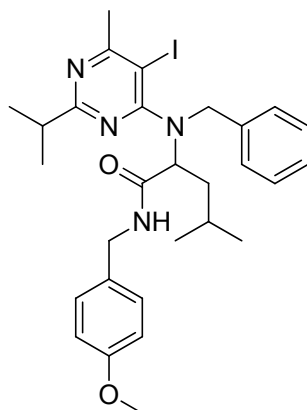

$C_{29}H_{37}IN_4O_2$   
MW = 600.53 g.mol<sup>-1</sup>

**1j**

General procedure using isovaleraldehyde (220  $\mu$ L, 2 mmol), benzylamine (220  $\mu$ L, 2 mmol), *p*-methoxybenzylisocyanide (300  $\mu$ L, 2 mmol) and 5-iodo-2-isopropyl-6-methylpyrimidin-4-ol (560 mg, 2 mmol). Purification by flash chromatography (petroleum ether-diethyl ether, 60:40) gave **1j** as a colorless oil.

**Yield** 65 % (780 mg).

**R<sub>f</sub>** 0.3 (60:40 petroleum ether / diethyl ether).

**<sup>1</sup>H NMR (CDCl<sub>3</sub>, 400 MHz)**  $\delta$  7.89 (t,  $J$  = 5.3 Hz, 1H), 7.21-7.07 (m, 7H), 6.81 (d,  $J$  = 8.6 Hz, 2H), 5.02 (d,  $J$  = 15.2 Hz, 1H), 4.53 (dd,  $J$  = 8.5, 6.1 Hz, 1H), 4.36 (dd,  $J$  = 14.3, 5.6 Hz, 1H), 4.31 (d,  $J$  = 15.2 Hz, 1H), 4.23 (dd,  $J$  = 14.3, 5.4 Hz, 1H), 3.80 (s, 3H), 2.83 (sept,  $J$  = 6.9 Hz, 1H), 2.62 (s, 3H), 2.00-1.84 (m, 2H), 1.72-1.59 (m, 1H), 1.12 (d,  $J$  = 6.9 Hz, 3H), 1.04 (d,  $J$  = 6.9 Hz, 3H), 0.86 (d,  $J$  = 6.6 Hz, 3H), 0.71 (d,  $J$  = 6.6 Hz, 3H).

**<sup>13</sup>C NMR (CDCl<sub>3</sub>, 100.6 MHz)**  $\delta$  172.9, 172.0, 171.4, 166.8, 159.3, 138.1, 130.5, 129.9, 128.6, 128.1, 127.3, 114.4, 85.4, 63.7, 55.7, 51.3, 43.7, 38.3, 36.9, 30.7, 25.3, 23.5, 22.1, 22.0, 21.6.

**I.R.** (thin film) 1661, 1534, 1511, 1454 cm<sup>-1</sup>.

**HRMS** Calculated for C<sub>29</sub>H<sub>37</sub>IN<sub>4</sub>O<sub>2</sub> 600.1961, found 600.1947.

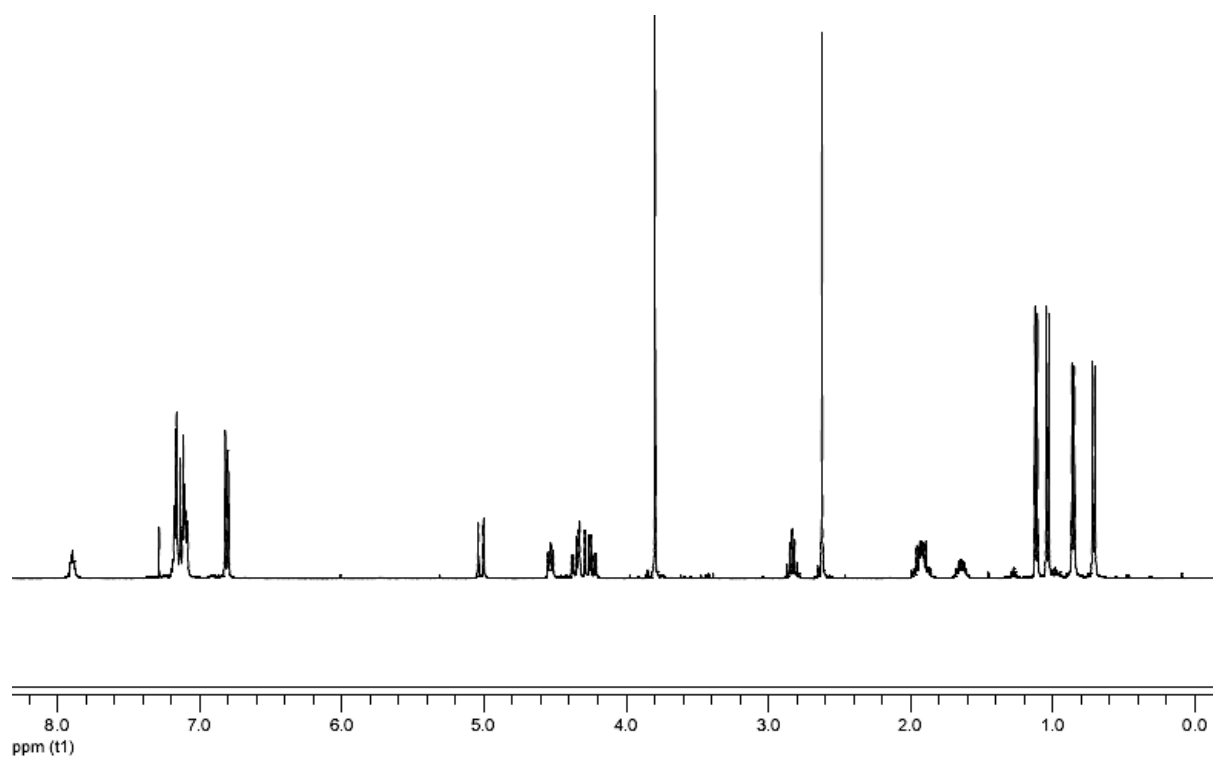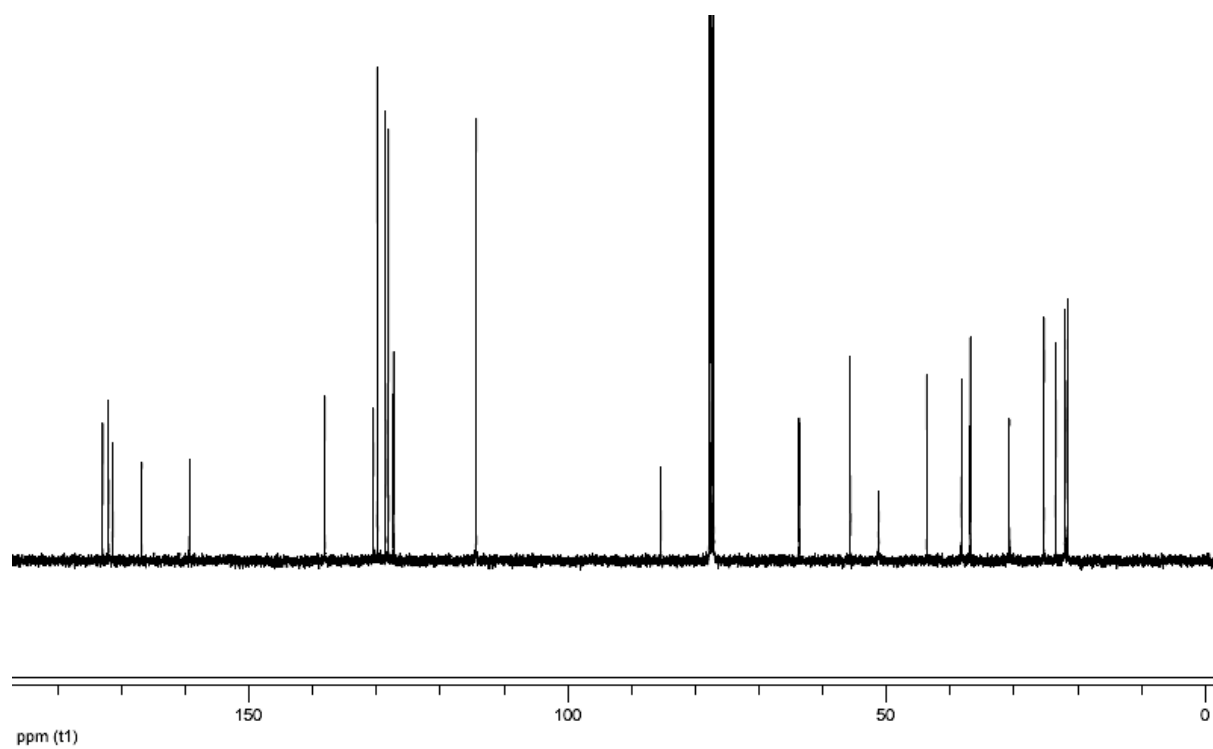

**2-[(4-fluorobenzyl)-(5-iodo-2-isopropyl-6-methylpyrimidin-4-yl)-amino]-4-methylpentanoic acid 4-methoxybenzylamide**

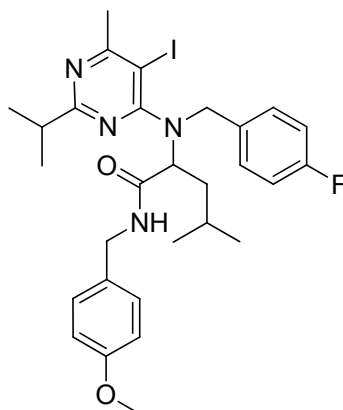

$C_{29}H_{36}FIN_4O_2$   
MW = 618.52 g.mol<sup>-1</sup>

**1k**

General procedure using isovaleraldehyde (220  $\mu$ L, 2 mmol), *p*-fluorobenzylamine (250  $\mu$ L, 2 mmol), *p*-methoxybenzylisocyanide (300  $\mu$ L, 2 mmol) and 5-iodo-2-isopropyl-6-methylpyrimidin-4-ol (560 mg, 2 mmol). Purification by flash chromatography (petroleum ether-diethyl ether, 70:30) gave **1k** as a colorless oil.

**Yield** 60 % (740 mg).

**R<sub>f</sub>** 0.3 (70:30 petroleum ether / diethyl ether).

**<sup>1</sup>H NMR (CDCl<sub>3</sub>, 400 MHz)**  $\delta$  7.83 (t,  $J$  = 5.3 Hz, 1H), 7.14 (d,  $J$  = 8.6 Hz, 2H), 7.05 (dd,  $J_{H-H} = 8.6, 5.6$  Hz, 2H), 6.83 (t,  $J_{H-H} = J_{H-F} = 8.6$  Hz, 2H), 6.82 (d,  $J$  = 8.6 Hz, 2H), 4.96 (d,  $J$  = 15.1 Hz, 1H), 4.49 (dd,  $J$  = 8.3, 6.2 Hz, 1H), 4.35 (dd,  $J$  = 14.4, 5.3 Hz, 1H), 4.30 (dd,  $J$  = 14.4, 5.6 Hz, 1H), 4.26 (d,  $J$  = 15.1 Hz, 1H), 3.80 (s, 3H), 2.86 (sept,  $J$  = 6.9 Hz, 1H), 2.62 (s, 3H), 1.99-1.90 (m, 1H), 1.90-1.80 (m, 1H), 1.69-1.58 (m, 1H), 1.14 (d,  $J$  = 6.9 Hz, 3H), 1.07 (d,  $J$  = 6.9 Hz, 3H), 0.85 (d,  $J$  = 6.6 Hz, 3H), 0.72 (d,  $J$  = 6.6 Hz, 3H).

**<sup>13</sup>C NMR (CDCl<sub>3</sub>, 100.6 MHz)**  $\delta$  173.0, 171.9, 171.5, 166.7, 162.1 (d,  $J_{C-F} = 245.2$  Hz), 159.5, 133.8 (d,  $J_{C-F} = 2.9$  Hz), 130.5, 129.8, 129.8 (d,  $J_{C-F} = 8.0$  Hz), 115.3 (d,  $J_{C-F} = 21.3$  Hz), 114.4, 85.6, 63.7, 55.7, 50.5, 43.7, 38.2, 36.9, 30.7, 25.4, 23.4, 22.1, 22.0, 21.7.

**I.R.** (thin film) 1664, 1537, 1511, 1466 cm<sup>-1</sup>.

**HRMS** Calculated for C<sub>29</sub>H<sub>36</sub>FIN<sub>4</sub>O<sub>2</sub> 618.1867, found 618.1840.



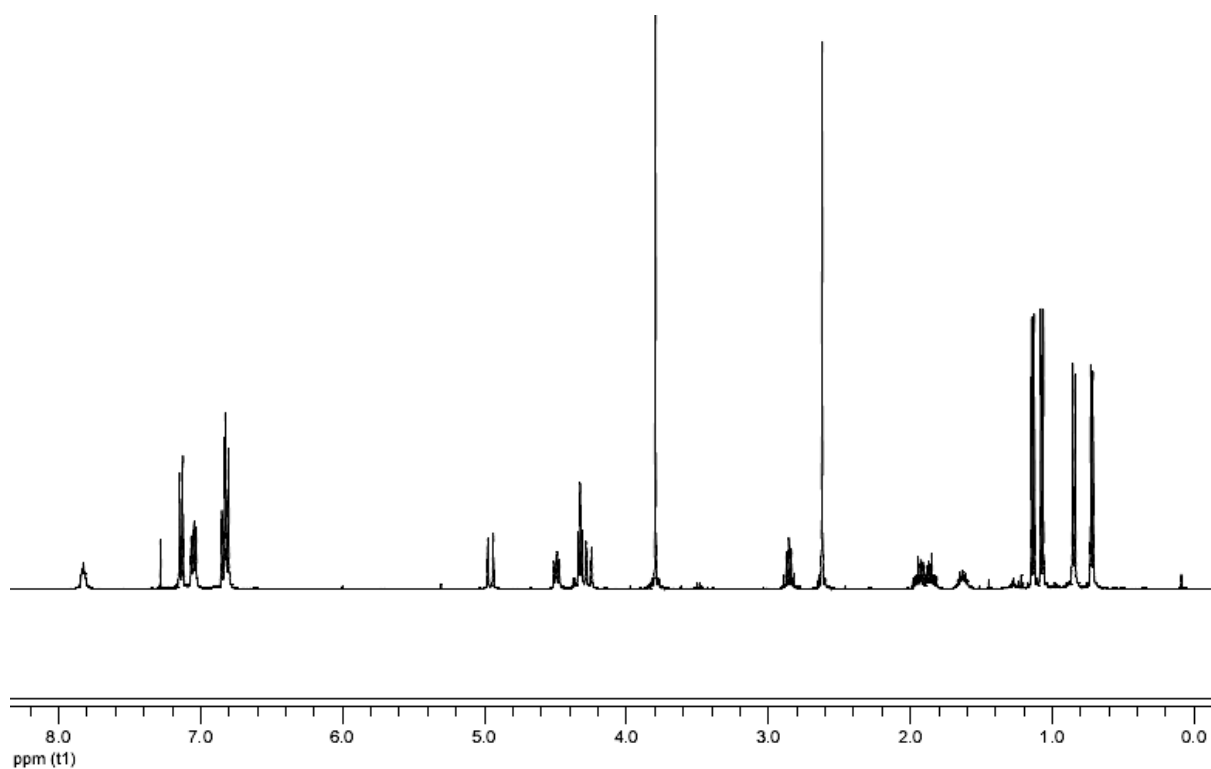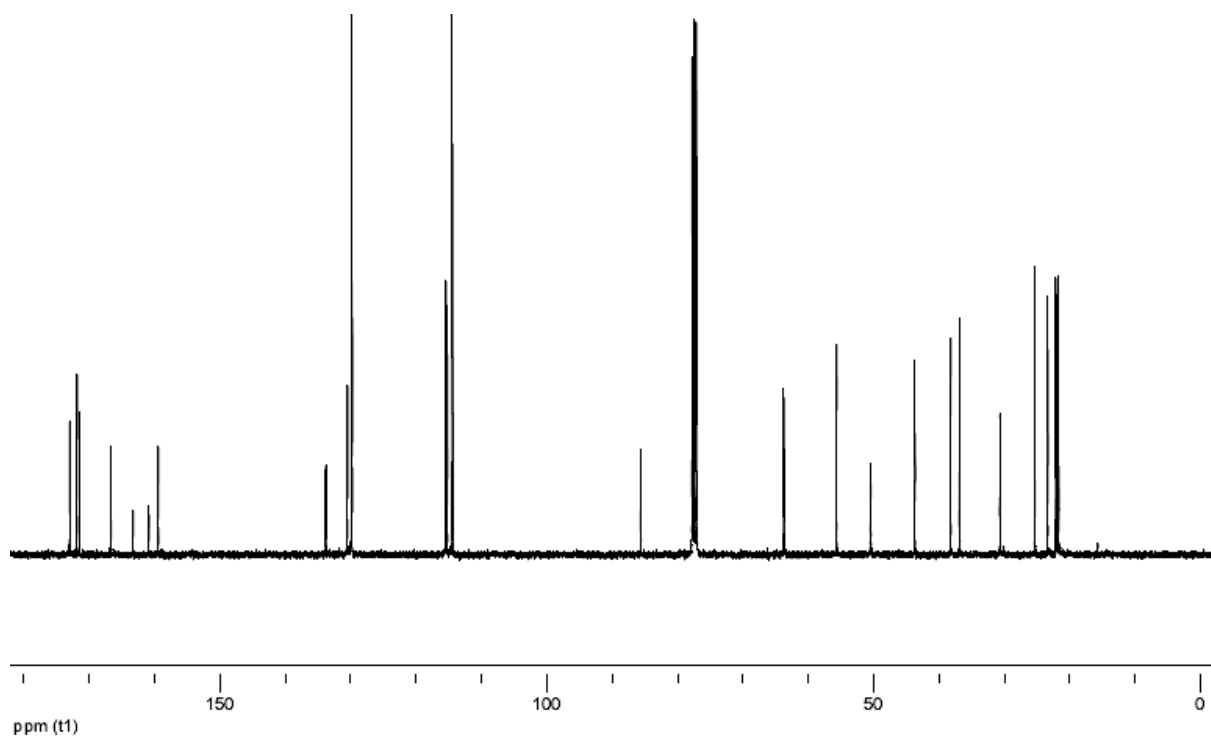

**2-[(2-chlorobenzyl)-(5-iodo-2-isopropyl-6-methylpyrimidin-4-yl)-amino]-N-(4-methoxybenzyl)-propionamide**

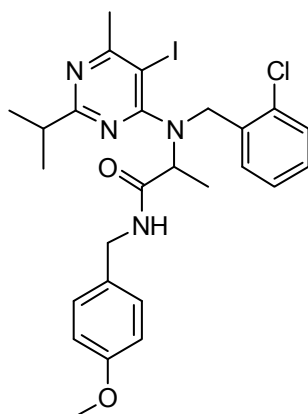

$C_{26}H_{30}ClIN_4O_2$   
MW = 592.90 g.mol<sup>-1</sup>

**11**

General procedure using acetaldehyde (110  $\mu$ L, 2 mmol), *o*-chlorobenzylamine (240  $\mu$ L, 2 mmol), *p*-methoxybenzylisocyanide (300  $\mu$ L, 2 mmol) and 5-iodo-2-isopropyl-6-methylpyrimidin-4-ol (560 mg, 2 mmol). Purification by flash chromatography (petroleum ether-diethyl ether, 80:20) gave **11** as a colorless oil.

**Yield** 54 % (640 mg).

**R<sub>f</sub>** 0.3 (80:20 petroleum ether / diethyl ether).

**<sup>1</sup>H NMR (CDCl<sub>3</sub>, 400 MHz)**  $\delta$  7.35-7.29 (m, 2H), 7.19-7.05 (m, 5H), 6.79 (d, *J* = 8.6 Hz, 2H), 4.86 (d, *J* = 16.2 Hz, 1H), 4.56 (q, *J* = 7.0 Hz, 1H), 4.49 (d, *J* = 16.2 Hz, 1H), 4.39 (dd, *J* = 14.4, 5.9 Hz, 1H), 4.31 (dd, *J* = 14.4, 5.3 Hz, 1H), 3.79 (s, 3H), 2.86 (sept, *J* = 6.9 Hz, 1H), 2.67 (s, 3H), 1.55 (d, *J* = 7.0 Hz, 3H), 1.11 (d, *J* = 6.9 Hz, 3H), 1.02 (d, *J* = 6.9 Hz, 3H).

**<sup>13</sup>C NMR (CDCl<sub>3</sub>, 100.6 MHz)**  $\delta$  173.6, 172.2, 172.0, 167.2, 159.3, 136.2, 133.5, 130.4, 129.8, 129.5, 128.6, 128.4, 127.1, 114.4, 87.4, 62.0, 55.7, 48.4, 43.7, 36.8, 30.7, 21.8, 21.6, 14.3.

**I.R.** (thin film) 1667, 1534, 1511, 1443 cm<sup>-1</sup>.

**HRMS** Calculated for [C<sub>26</sub>H<sub>30</sub>ClIN<sub>4</sub>O<sub>2</sub> - C<sub>9</sub>H<sub>10</sub>NO<sub>2</sub>] 428.0390, found 428.0393.

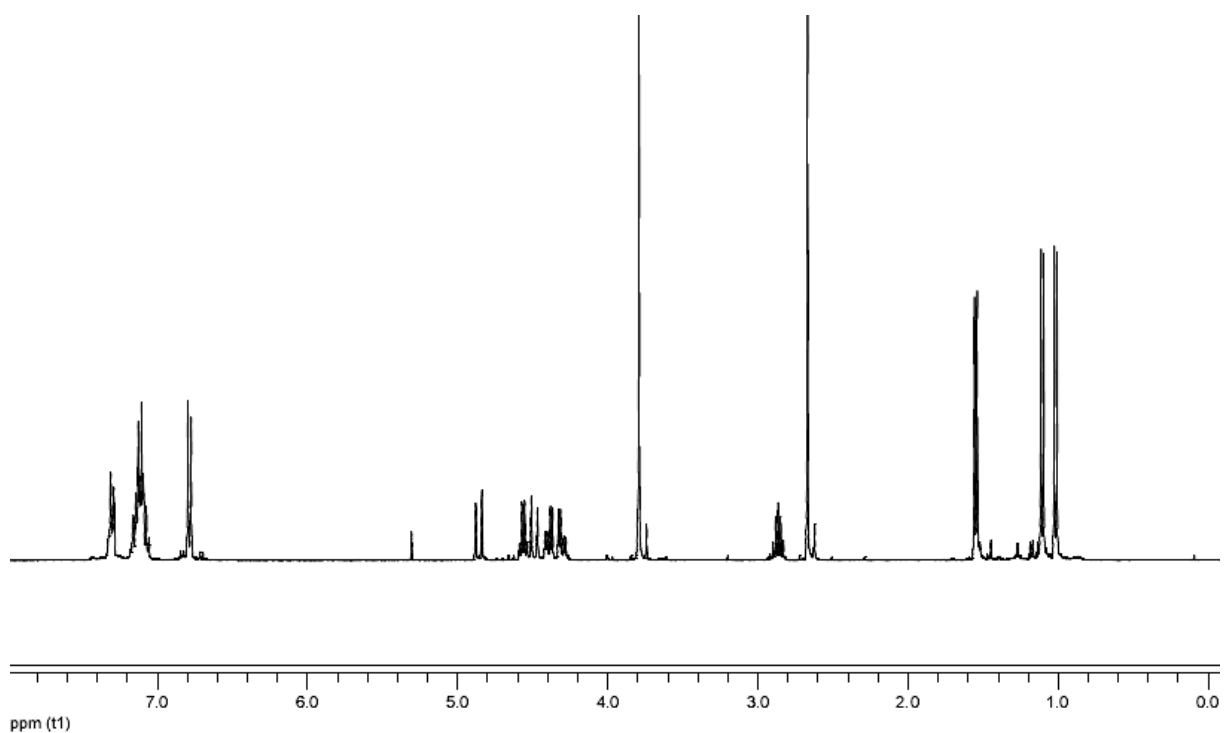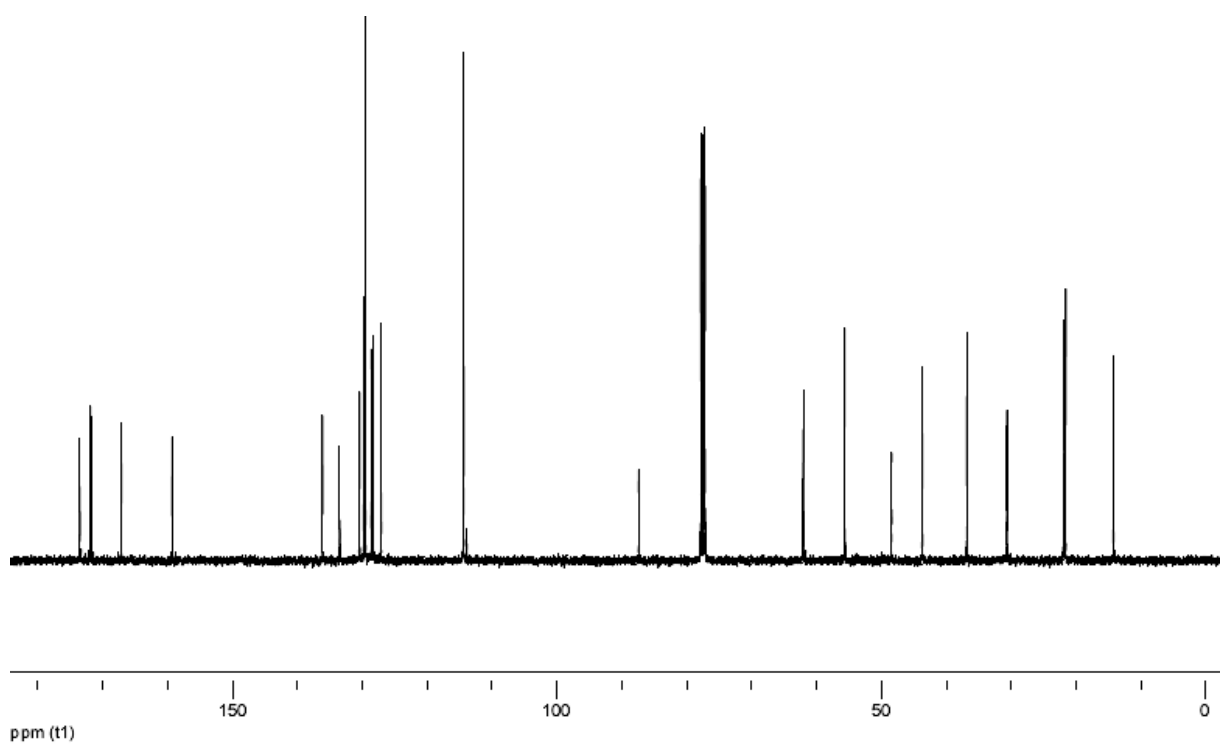

***N*-(4-chlorobenzyl)-2-[(5-iodo-2-isopropyl-6-methylpyrimidin-4-yl)-(4-methylbenzyl)-amino]-butyramide**

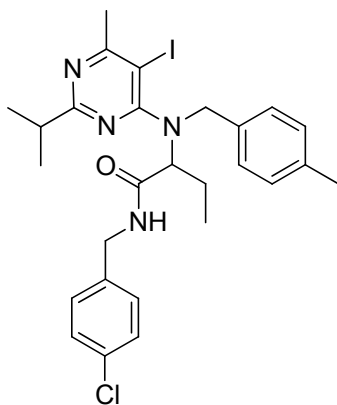

$C_{27}H_{32}ClIN_4O$   
MW = 590.93 g.mol<sup>-1</sup>

**1m**

General procedure using propionaldehyde (150  $\mu$ L, 2 mmol), *p*-methylbenzylamine (260  $\mu$ L, 2 mmol), *p*-chlorobenzylisocyanide (260  $\mu$ L, 2 mmol) and 5-iodo-2-isopropyl-6-methylpyrimidin-4-ol (560 mg, 2 mmol). Purification by flash chromatography (petroleum ether-diethyl ether, 70:30) gave **1m** as a colorless oil.

**Yield** 55 % (650 mg).

**R<sub>f</sub>** 0.3 (70:30 petroleum ether / diethyl ether).

**<sup>1</sup>H NMR (CDCl<sub>3</sub>, 400 MHz)**  $\delta$  7.92 (t,  $J$  = 5.8 Hz, 1H), 7.24 (d,  $J$  = 8.3 Hz, 2H), 7.10 (d,  $J$  = 8.3 Hz, 2H), 6.98 (s, 4H), 4.95 (d,  $J$  = 15.2 Hz, 1H), 4.39-4.24 (m, 4H), 2.85 (sept,  $J$  = 6.9 Hz, 1H), 2.64 (s, 3H), 2.28 (s, 3H), 2.25-2.11 (m, 1H), 2.03-1.90 (m, 1H), 1.14 (d,  $J$  = 6.9 Hz, 3H), 1.08 (d,  $J$  = 6.9 Hz, 3H), 0.93 (t,  $J$  = 7.4 Hz, 3H).

**<sup>13</sup>C NMR (CDCl<sub>3</sub>, 100.6 MHz)**  $\delta$  173.0, 172.2, 171.6, 167.1, 137.1, 137.0, 134.9, 132.6, 129.8, 129.3, 129.1, 128.1, 85.6, 67.4, 51.3, 43.4, 36.9, 30.8, 23.1, 21.9, 21.7, 21.4, 12.1.

**I.R.** (thin film) 1661, 1531, 1515, 1344 cm<sup>-1</sup>.

**HRMS** Calculated for C<sub>27</sub>H<sub>32</sub>ClIN<sub>4</sub>O 590.1309, found 509.1339.

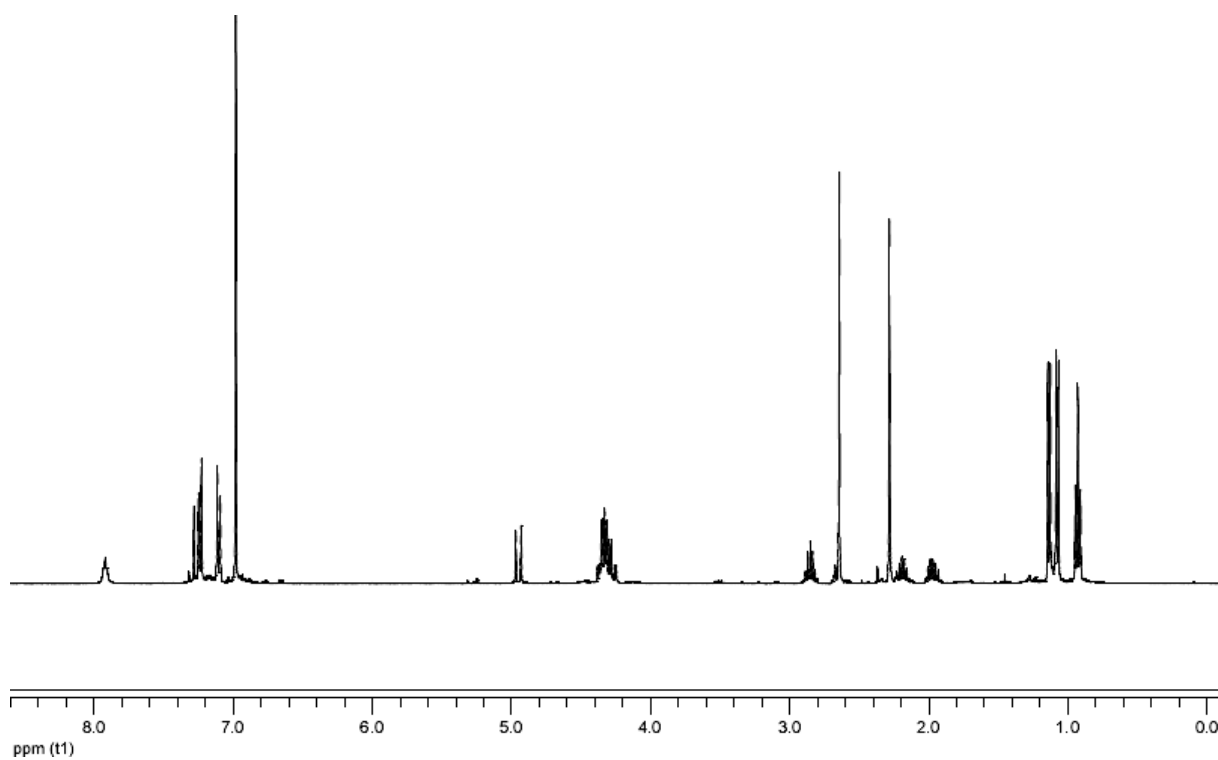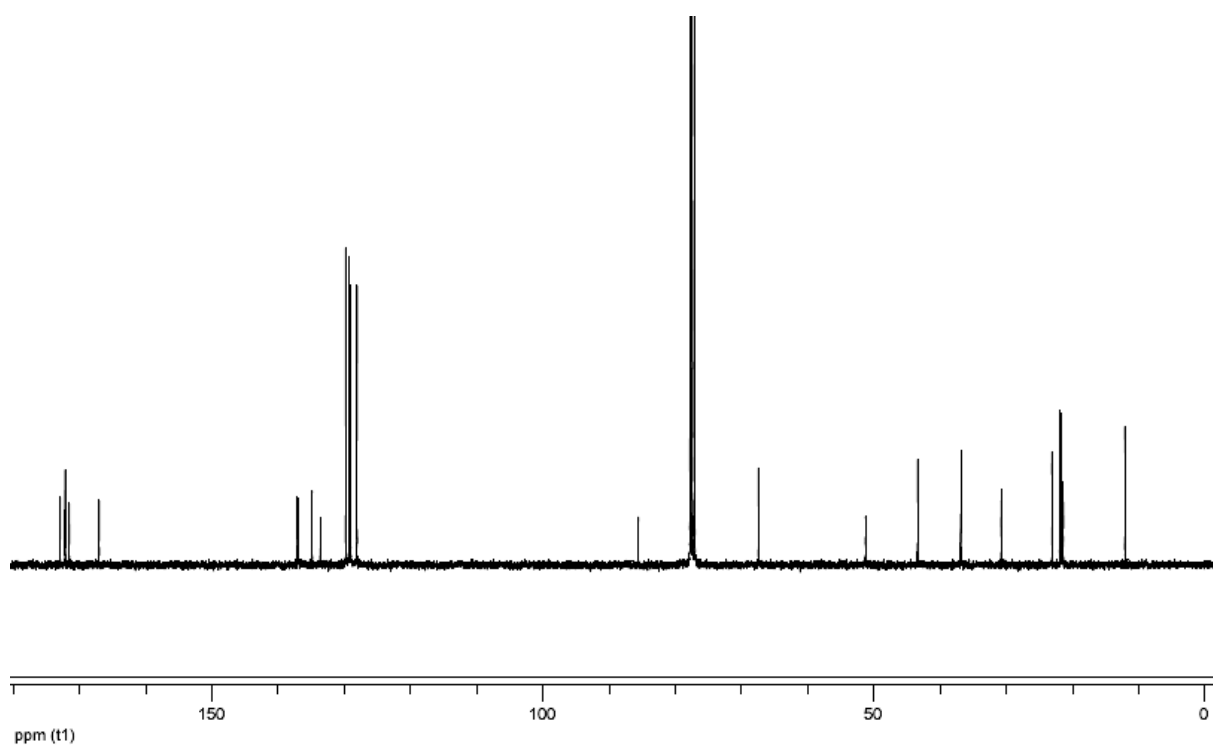

**2-[(5-iodo-2-isopropyl-6-methylpyrimidin-4-yl)-(4-methoxybenzyl)-amino]-4-methylpentanoic acid 4-chlorobenzamide**

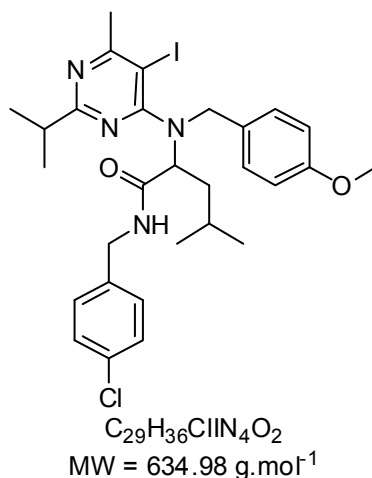

**1n**

General procedure using isovaleraldehyde (220  $\mu$ L, 2 mmol), *p*-methoxybenzylamine (300  $\mu$ L, 2 mmol), *p*-chlorobenzylisocyanide (260  $\mu$ L, 2 mmol) and 5-iodo-2-isopropyl-6-methylpyrimidin-4-ol (560 mg, 2 mmol). Purification by flash chromatography (petroleum ether-diethyl ether, 70:30) gave **1n** as a colorless oil.

**Yield** 89 % (1.15 g).

**R<sub>f</sub>** 0.3 (70:30 petroleum ether / diethyl ether).

**<sup>1</sup>H NMR (CDCl<sub>3</sub>, 400 MHz)**  $\delta$  8.18 (t,  $J$  = 5.3 Hz, 1H), 7.23 (d,  $J$  = 8.4 Hz, 2H), 7.11 (d,  $J$  = 8.4 Hz, 2H), 6.99 (d,  $J$  = 8.6 Hz, 2H), 6.68 (d,  $J$  = 8.6 Hz, 2H), 4.95 (d,  $J$  = 15.0 Hz, 1H), 4.46 (dd,  $J$  = 7.6, 7.0 Hz, 1H), 4.37-4.21 (m, 3H), 3.74 (s, 3H), 2.85 (sept,  $J$  = 6.9 Hz), 2.63 (s, 3H), 1.97-1.82 (m, 2H), 1.71-1.55 (m, 1H), 1.13 (d,  $J$  = 6.9 Hz, 3H), 1.08 (d,  $J$  = 6.9 Hz, 3H), 0.84 (d,  $J$  = 6.6 Hz, 3H), 0.72 (d,  $J$  = 6.6 Hz, 3H).

**<sup>13</sup>C NMR (CDCl<sub>3</sub>, 100.6 MHz)**  $\delta$  172.9, 172.5, 171.6, 166.7, 159.0, 137.1, 133.6, 129.9, 129.8, 129.6, 129.1, 113.9, 85.6, 63.6, 55.6, 51.2, 43.4, 38.3, 36.9, 30.8, 25.3, 23.5, 22.0, 22.0, 21.8.

**I.R.** (thin film) 1667, 1534, 1510, 1459 cm<sup>-1</sup>.

**HRMS** Calculated for [C<sub>29</sub>H<sub>36</sub>ClIN<sub>4</sub>O<sub>2</sub> - C<sub>8</sub>H<sub>7</sub>ClNO] 466.1355, found 466.1361.

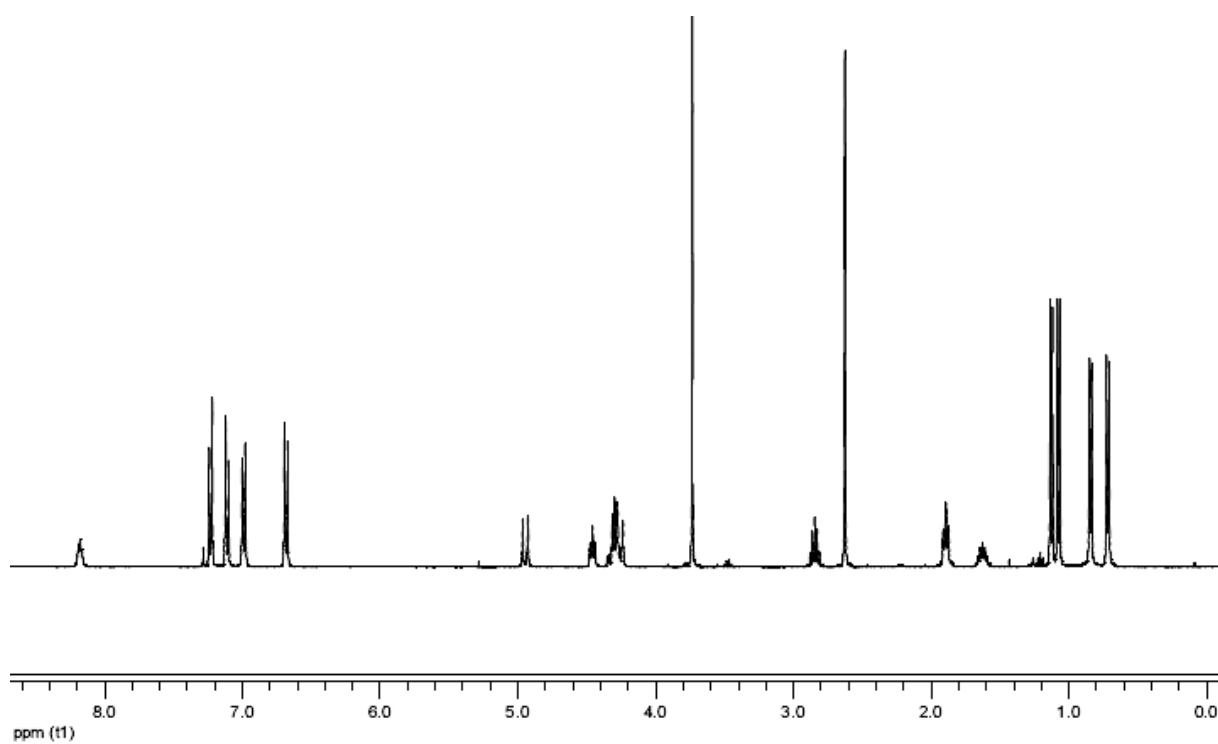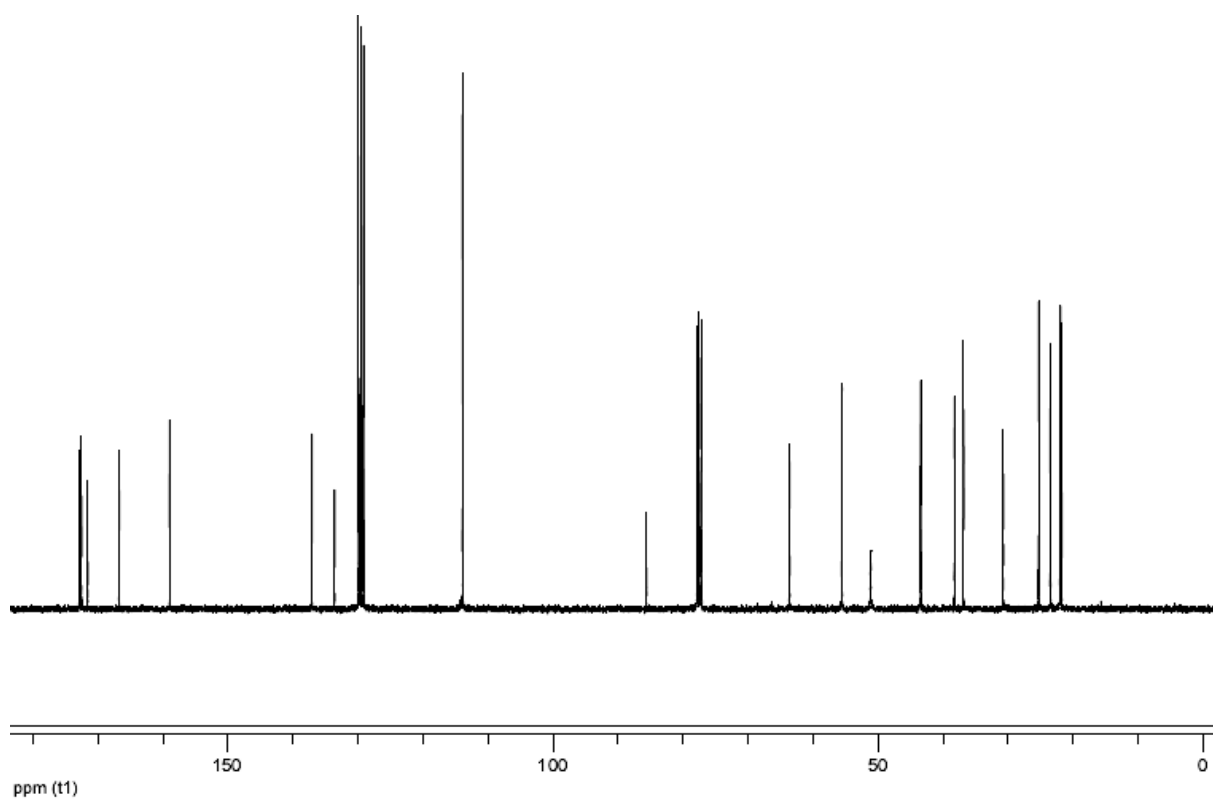

**2-[(5-iodo-2-isopropyl-6-methylpyrimidin-4-yl)-pyridin-3-ylmethyl-amino]-N-(4-methoxybenzyl)-butyramide**

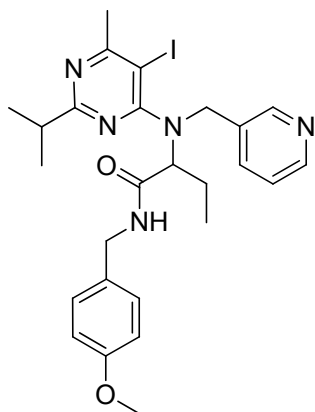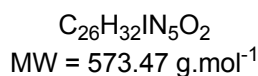

General procedure using propionaldehyde (150  $\mu$ L, 2 mmol), pyridin-3-ylmethylamine (250  $\mu$ L, 2 mmol), *p*-methoxybenzylisocyanide (260  $\mu$ L, 2 mmol) and 5-iodo-2-isopropyl-6-methylpyrimidin-4-ol (560 mg, 2 mmol). Purification by flash chromatography (petroleum ether-diethyl ether, 70:30) gave **1o** as a colorless oil.

**Yield** 41 % (470 mg).

**R<sub>f</sub>** 0.3 (70:30 petroleum ether / diethyl ether).

**<sup>1</sup>H NMR (CDCl<sub>3</sub>, 400 MHz)**  $\delta$  8.44 (s, 1H), 8.39 (d,  $J$  = 4.7 Hz, 1H), 7.52 (t,  $J$  = 5.3 Hz, 1H), 7.40 (d,  $J$  = 7.8 Hz, 1H), 7.15 (d,  $J$  = 7.4 Hz, 2H), 7.07 (dd,  $J$  = 7.8, 4.7 Hz, 1H), 6.81 (d,  $J$  = 7.4 Hz, 2H), 4.91 (d,  $J$  = 15.2 Hz, 1H), 4.41-4.29 (m, 4H), 3.79 (s, 3H), 2.84 (sept,  $J$  = 6.8 Hz, 1H), 2.61 (s, 3H), 2.27-2.14 (m, 1H), 2.02-1.88 (m, 1H), 1.12 (d,  $J$  = 6.8 Hz, 3H), 1.06 (d,  $J$  = 6.8 Hz, 3H), 0.92 (t,  $J$  = 7.6 Hz, 3H).

**<sup>13</sup>C NMR (CDCl<sub>3</sub>, 100.6 MHz)**  $\delta$  173.2, 171.7, 171.3, 166.7, 159.5, 149.9, 148.7, 135.7, 133.9, 130.5, 129.7, 123.4, 114.5, 85.8, 67.5, 55.7, 48.4, 43.6, 36.9, 30.7, 23.1, 21.9, 21.7, 12.0.

**I.R.** (thin film) 1661, 1534, 1511, 1428 cm<sup>-1</sup>.

**HRMS** Calculated for C<sub>26</sub>H<sub>32</sub>IN<sub>5</sub>O<sub>2</sub> 573.1601, found 573.1603.



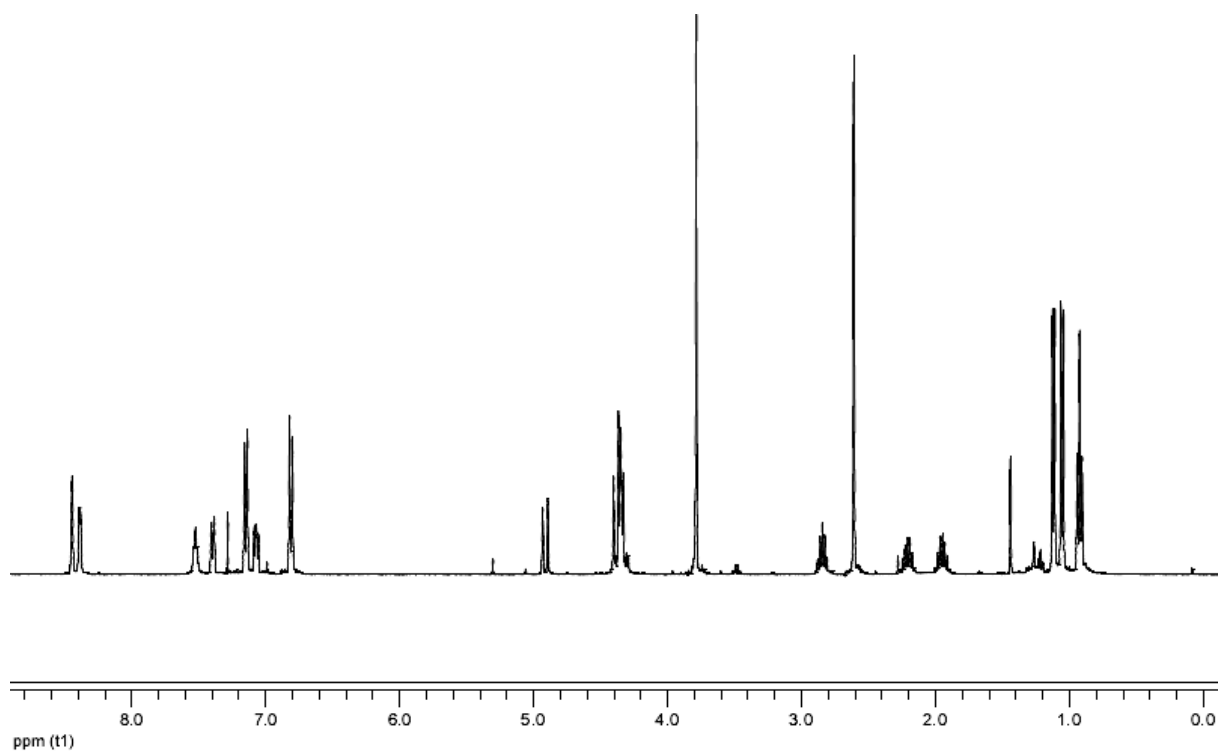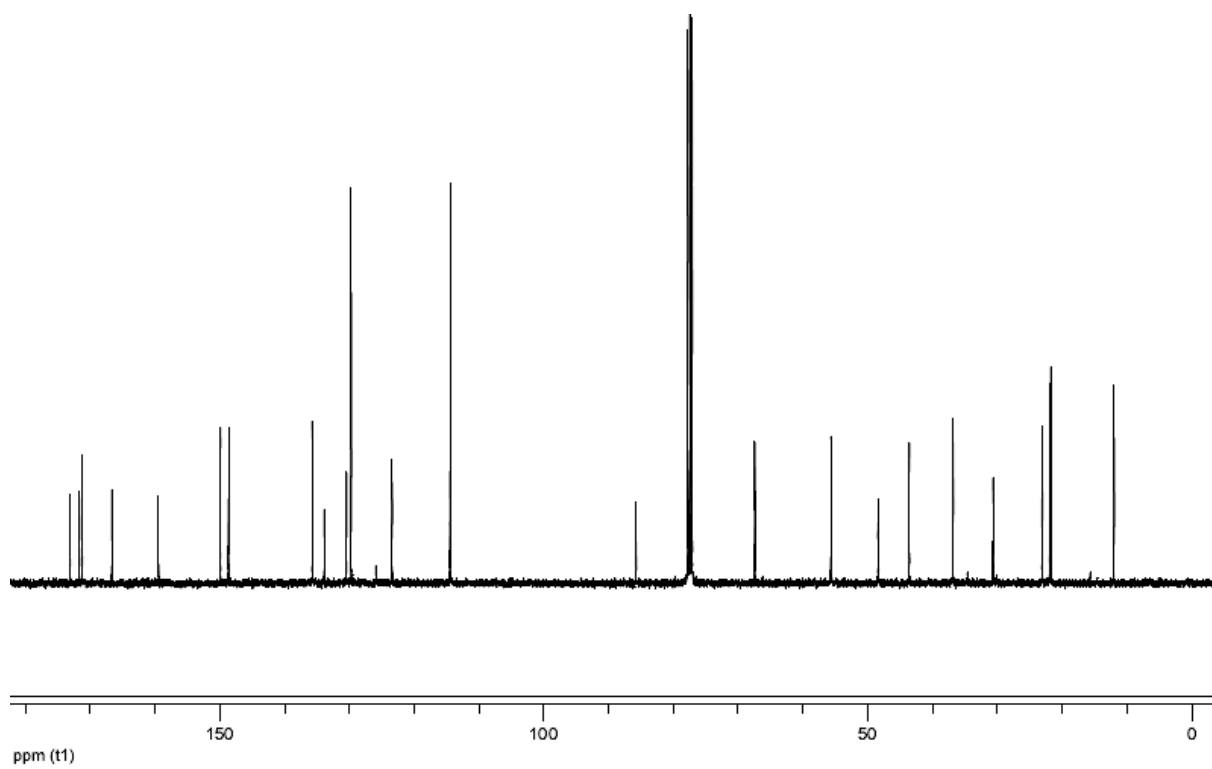

**General procedure for the synthesis of the Ugi-Smiles/Sonogashira adducts :**

To a 0.1 M solution of Smiles adduct in acetonitrile were successively added alkyne (1.2 equiv.), *bis*(triphenylphosphine)palladium chloride (5 mol %), CuI (5 mol%) and diisopropylethylamine (1 equiv.). The resulting mixture was stirred at 70 °C overnight.

The crude mixture was first filtered and rinsed with methanol. After removal of the volatile materials, purification by flash chromatography gave the corresponding Ugi-Smiles/Sonogashira adduct.

**2-[(2-isopropyl-6-methyl-5-phenylethynylpyrimidin-4-yl)-(2-methoxyethyl)-amino]-4-methylpentanoic acid 4-methoxybenzylamide**

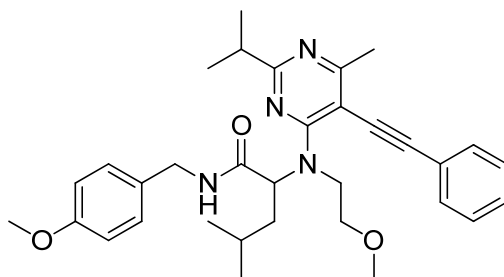

$C_{33}H_{42}N_4O_3$   
MW = 542.71 g.mol<sup>-1</sup>

**2a**

General procedure using **1a** (280 mg, 0.52 mmol), phenylacetylene (70  $\mu$ L, 0.62 mmol), *bis*(triphenylphosphine)palladium chloride (18 mg, 0.03 mmol), CuI (5 mg, 0.03 mmol) and diisopropylethylamine (90  $\mu$ L, 0.52 mmol). Purification by flash chromatography (petroleum ether-diethyl ether, 70:30) afforded **2a** as a colorless oil.

**Yield** 64 % (180 mg).

**R<sub>f</sub>** 0.3 (60:40 petroleum ether / diethyl ether).

**<sup>1</sup>H NMR (CDCl<sub>3</sub>, 400 MHz)**  $\delta$  8.24-8.15 (br s, 1H), 7.53-7.47 (m, 2H), 7.39-7.33 (m, 3H), 7.10 (d,  $J$  = 8.6 Hz, 2H), 6.74 (d,  $J$  = 8.6 Hz, 2H), 5.34-5.16 (br s, 1H), 4.42 (dd,  $J$  = 14.4, 5.8 Hz, 1H), 4.25 (dd,  $J$  = 14.4, 4.5 Hz, 1H), 4.13 (d,  $J$  = 13.1 Hz, 1H), 3.79-3.71 (m, 1H), 3.75 (s, 3H), 3.53-3.44 (m, 2H), 3.00 (sept,  $J$  = 6.8 Hz, 1H), 2.93 (s, 3H), 2.66 (s, 3H), 2.09-2.00 (m, 1H), 1.95-1.84 (m, 1H), 1.50-1.38 (m, 1H), 1.24 (d,  $J$  = 6.8 Hz, 6H), 0.91 (d,  $J$  = 6.6 Hz, 3H), 0.73 (d,  $J$  = 6.6 Hz, 3H).

**<sup>13</sup>C NMR (CDCl<sub>3</sub>, 100.6 MHz)**  $\delta$  172.4, 171.9, 170.6, 162.7, 159.1, 131.6, 130.8, 129.7, 129.0, 128.9, 123.3, 114.2, 102.3, 100.7, 84.0, 70.1, 63.4, 59.0, 55.6, 43.8, 39.2, 37.8, 25.3, 24.4, 23.9, 22.1, 21.7, 21.6.

**HRMS** Calculated for C<sub>33</sub>H<sub>42</sub>N<sub>4</sub>O<sub>3</sub> 542.3257, found 542.3259.

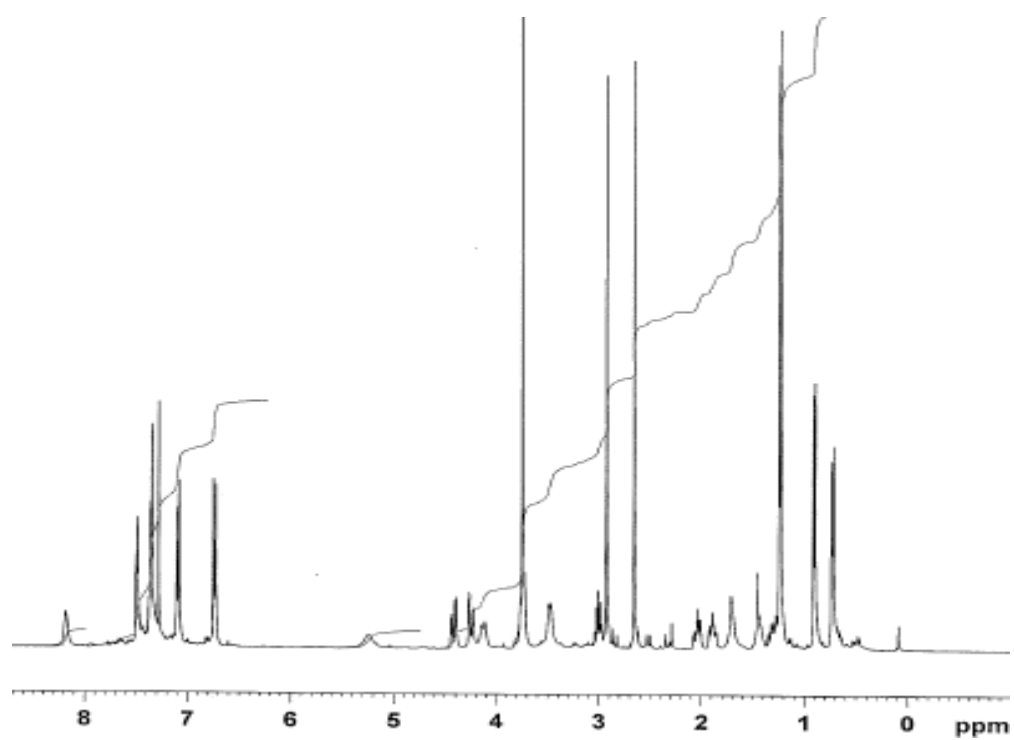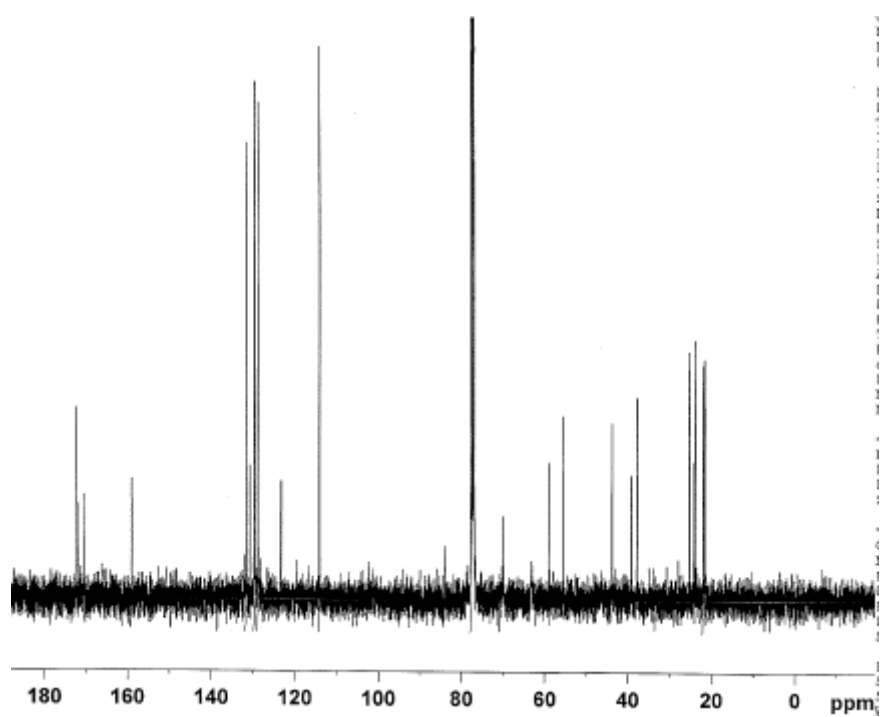

**2-[(4-chlorobenzyl)-(2-isopropyl-6-methyl-5-phenylethynyl-pyrimidin-4-yl)-amino]-4-methylpentanoic acid 4-methylbenzylamide**

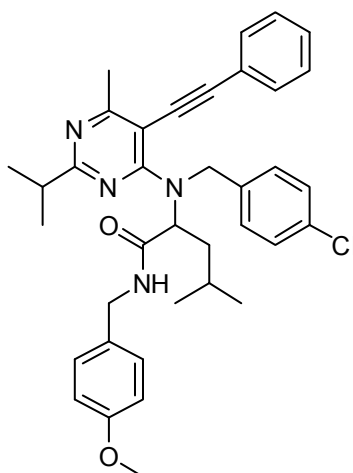

$C_{37}H_{41}ClN_4O_2$   
MW = 609.20 g.mol<sup>-1</sup>

**2b**

General procedure using **1b** (740 mg, 1.17 mmol), phenylacetylene (160  $\mu$ L, 1.20 mmol), *bis*(triphenylphosphine)palladium chloride (42 mg, 0.06 mmol), CuI (12 mg, 0.06 mmol) and diisopropylethylamine (200  $\mu$ L, 1.17 mmol). Purification by flash chromatography (petroleum ether-diethyl ether, 70:30) afforded **2b** as a colorless oil.

**Yield** 59 % (420 mg).

**R<sub>f</sub>** 0.3 (70:30 petroleum ether / diethyl ether).

**<sup>1</sup>H NMR (CDCl<sub>3</sub>, 400 MHz)**  $\delta$  7.41-7.26 (m, 4H), 7.21-7.10 (m, 6H), 7.01 (d,  $J$  = 8.4 Hz, 2H), 6.78 (d,  $J$  = 8.4 Hz, 2H), 5.44-5.28 (m, 1H), 5.22 (d,  $J$  = 16.7 Hz, 1H), 4.87 (d,  $J$  = 16.7 Hz, 1H), 4.30-4.18 (m, 2H), 3.80 (s, 3H), 2.92 (sept,  $J$  = 6.8 Hz, 1H), 2.61 (s, 3H), 2.00-1.88 (m, 1H), 1.83-1.73 (m, 1H), 1.63-1.52 (sept,  $J$  = 6.6 Hz, 1H), 1.14 (d,  $J$  = 6.8 Hz, 3H), 1.13 (d,  $J$  = 6.8 Hz, 3H), 0.87 (d,  $J$  = 6.6 Hz, 3H), 0.83 (d,  $J$  = 6.6 Hz, 3H).

**<sup>13</sup>C NMR (CDCl<sub>3</sub>, 100.6 MHz)**  $\delta$  172.1, 171.6, 171.2, 163.1, 159.4, 137.8, 132.9, 131.2, 130.3, 129.7, 129.3, 129.1, 128.9, 128.7, 123.0, 114.4, 102.1, 100.2, 84.7, 60.4, 55.7, 50.0, 43.6, 38.5, 37.8, 25.4, 24.5, 23.3, 22.7, 21.8, 21.7.

**I.R.** (thin film) 1676, 1514, 1491, 1465 cm<sup>-1</sup>.

**HRMS** Calculated for C<sub>37</sub>H<sub>41</sub>ClN<sub>4</sub>O<sub>2</sub> 608.2918, found 608.2923.

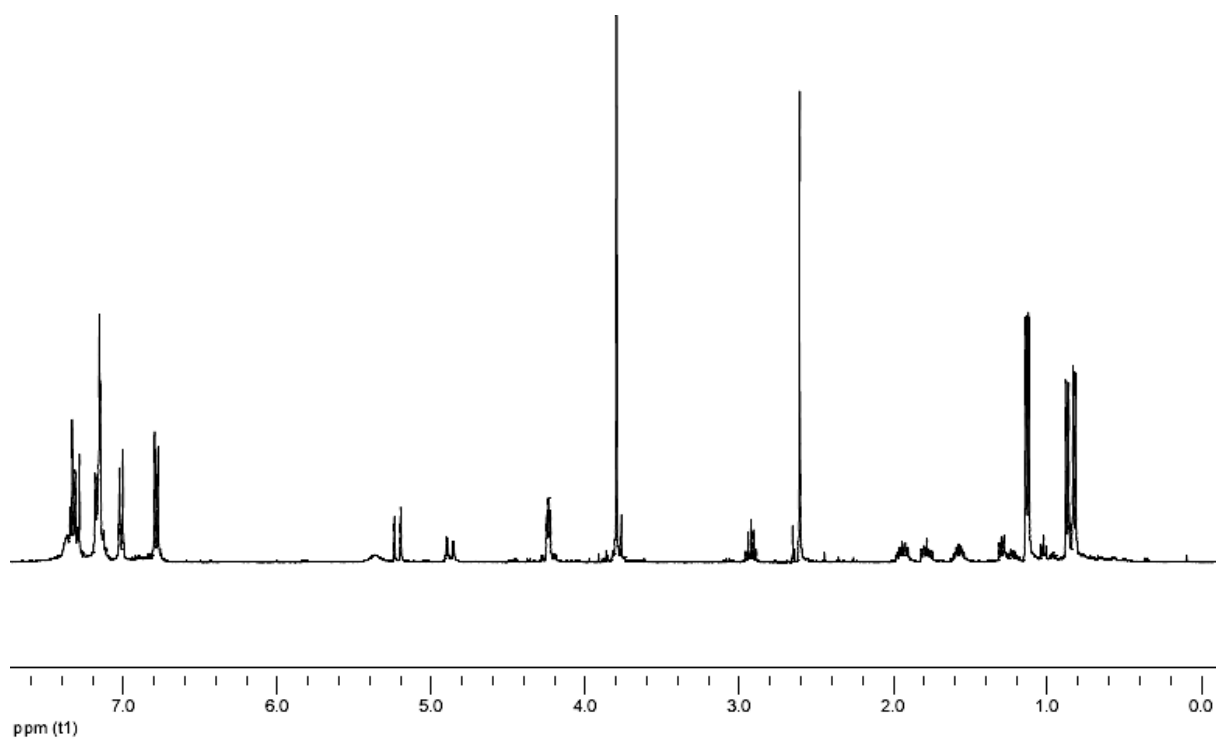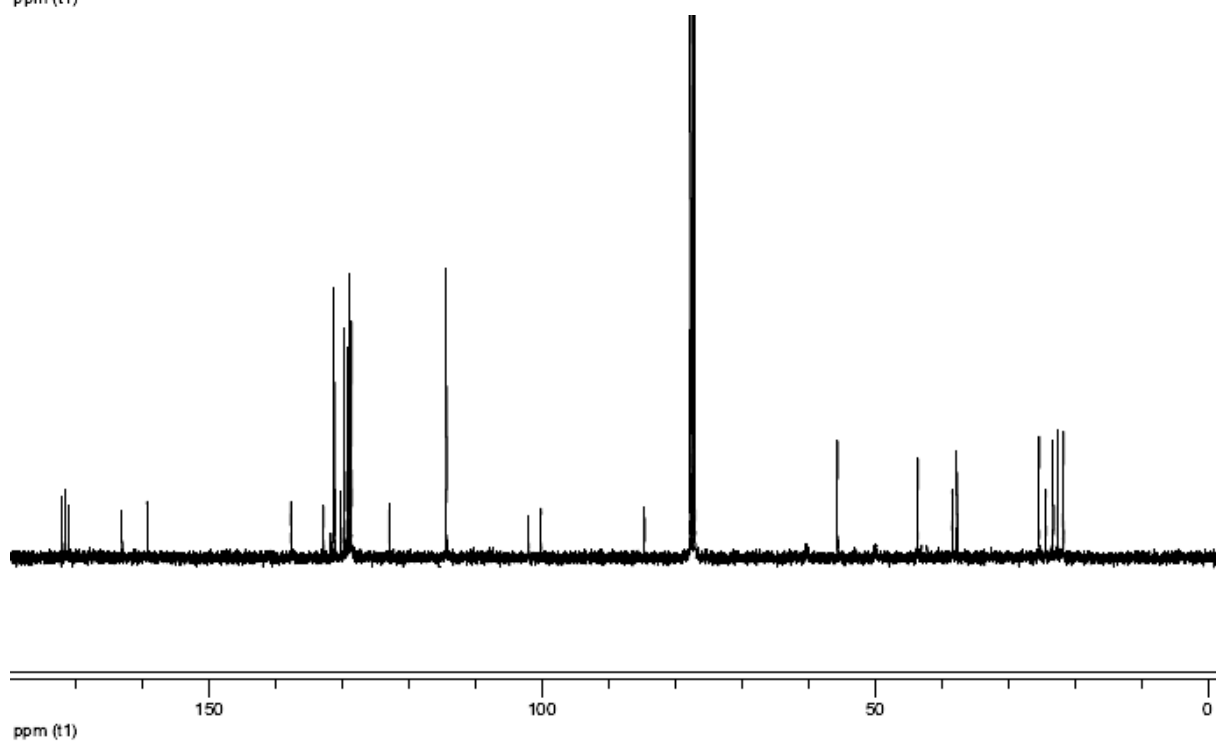

**2-[(4-chlorobenzyl)-(2-isopropyl-6-methyl-5-p-tolylethynylpyrimidin-4-yl)-amino]-4-methyl-pentanoic acid 4-chlorobenzylamide**

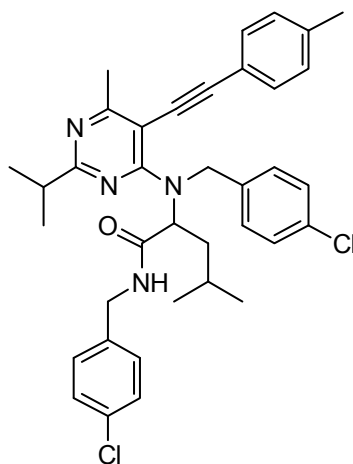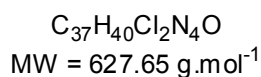

**2c**

General procedure using **1c** (800 mg, 1.25 mmol), 1-ethynyl-4-methylbenzene (190  $\mu$ L, 1.50 mmol), *bis*(triphenylphosphine)palladium chloride (44 mg, 0.06 mmol), CuI (13 mg, 0.06 mmol) and diisopropylethylamine (215  $\mu$ L, 1.25 mmol). Purification by flash chromatography (petroleum ether-diethyl ether, 70:30) afforded **2c** as a colorless oil.

**Yield** 60 % (470 mg).

**R<sub>f</sub>** 0.3 (70:30 petroleum ether / diethyl ether).

**<sup>1</sup>H NMR (CDCl<sub>3</sub>, 400 MHz)**  $\delta$  7.61-7.50 (m, 1H), 7.22 (d,  $J$  = 8.4 Hz, 2H), 7.20-7.14 (m, 4H), 7.12 (d,  $J$  = 8.1 Hz, 2H), 7.06 (d,  $J$  = 8.1 Hz, 2H), 7.02 (d,  $J$  = 8.4 Hz, 2H), 5.45-5.26 (m, 1H), 5.23 (d,  $J$  = 16.4 Hz, 1H), 4.86 (d,  $J$  = 16.4 Hz, 1H), 4.31 (dd,  $J$  = 14.7, 5.8 Hz, 1H), 4.21 (dd,  $J$  = 14.7, 5.6 Hz, 1H), 2.94 (sept,  $J$  = 6.9 Hz, 1H), 2.62 (s, 3H), 2.38 (s, 3H), 2.00-1.89 (m, 1H), 1.83-1.73 (m, 1H), 1.63-1.51 (m, 1H), 1.15 (d,  $J$  = 6.9 Hz, 3H), 1.13 (d,  $J$  = 6.9 Hz, 3H), 0.87 (d,  $J$  = 6.6 Hz, 3H), 0.83 (d,  $J$  = 6.6 Hz, 3H).

**<sup>13</sup>C NMR (CDCl<sub>3</sub>, 100.6 MHz)**  $\delta$  172.0, 171.9, 171.2, 163.0, 139.5, 137.8, 136.9, 133.7, 133.0, 131.1, 129.7, 129.6, 129.3, 129.2, 128.7, 119.8, 102.5, 100.5, 83.9, 60.5, 50.1, 43.4, 38.5, 37.8, 25.4, 24.5, 23.3, 22.7, 22.0, 21.9, 21.8.

**I.R.** (thin film) 1679, 1530, 1511, 1496 cm<sup>-1</sup>.

**HRMS** Calculated for C<sub>37</sub>H<sub>40</sub>Cl<sub>2</sub>N<sub>4</sub>O 626.2579, found 626.2575.

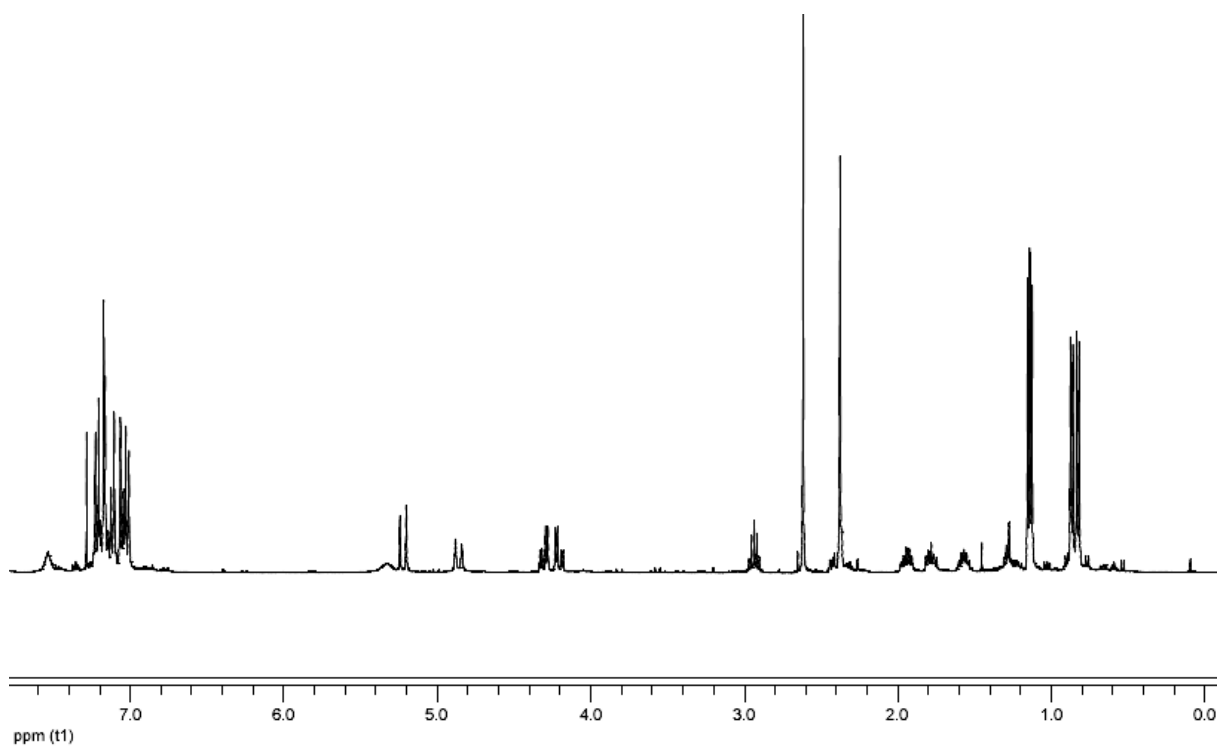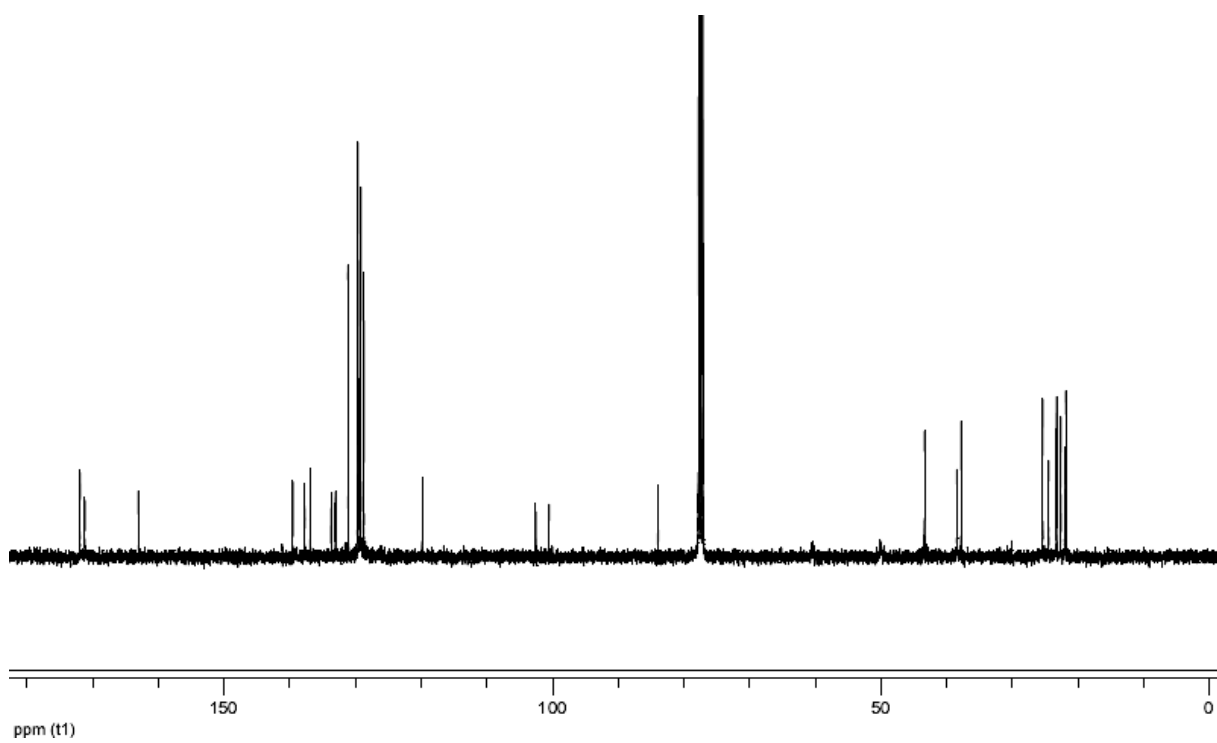



**2-[(4-chlorobenzyl)-(2-isopropyl-6-methyl-5-phenylethynylpyrimidin-4-yl)-amino]-4-methylpentanoic acid cyclohexylamide**

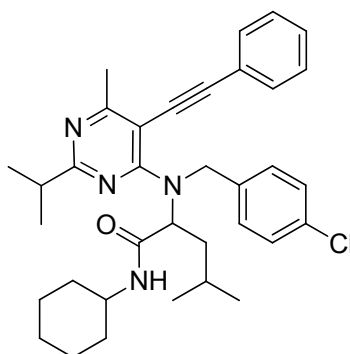

$C_{35}H_{43}ClN_4O$   
MW = 571.20 g.mol<sup>-1</sup>

**2d**

General procedure using **1d** (415 mg, 0.70 mmol), phenylacetylene (120  $\mu$ L, 0.84 mmol), *bis*(triphenylphosphine)palladium chloride (25 mg, 0.04 mmol), CuI (7 mg, 0.04 mmol) and diisopropylethylamine (120  $\mu$ L, 0.70 mmol). Purification by flash chromatography (petroleum ether-diethyl ether, 70:30) afforded **2d** as a colorless oil.

**Yield** 64 % (255 mg).

**R<sub>f</sub>** 0.3 (70:30 petroleum ether / diethyl ether).

**<sup>1</sup>H NMR (CDCl<sub>3</sub>, 400 MHz)**  $\delta$  7.36-7.29 (m, 3H), 7.25-7.17 (m, 6H), 6.84 (d,  $J$  = 7.9 Hz, 1H), 5.54-5.40 (m, 1H), 5.21 (d,  $J$  = 16.6 Hz, 1H), 4.90 (d,  $J$  = 16.6 Hz, 1H), 3.71-3.58 (m, 1H), 3.04 (sept,  $J$  = 6.9 Hz, 1H), 2.62 (s, 3H), 1.93-1.77 (m, 2H), 1.77-1.48 (m, 6H), 1.30-1.24 (m, 2H), 1.31 (d,  $J$  = 6.9 Hz, 3H), 1.23 (d,  $J$  = 6.9 Hz, 3H), 1.15-0.88 (m, 3H), 0.87 (d,  $J$  = 6.6 Hz, 3H), 0.83 (d,  $J$  = 6.6 Hz, 3H).

**<sup>13</sup>C NMR (CDCl<sub>3</sub>, 100.6 MHz)**  $\delta$  172.1, 171.2, 170.7, 163.0, 138.1, 132.8, 131.3, 129.1, 129.1, 128.9, 128.6, 123.1, 101.9, 99.9, 84.9, 59.9, 49.6, 48.6, 37.9, 33.5, 33.3, 25.9, 25.4, 24.5, 23.3, 22.7, 22.2, 22.2, 21.9.

**I.R.** (thin film) 1678, 1528, 1491, 1407 cm<sup>-1</sup>.

**HRMS** Calculated for C<sub>35</sub>H<sub>43</sub>ClN<sub>4</sub>O 570.3125, found 570.3123.

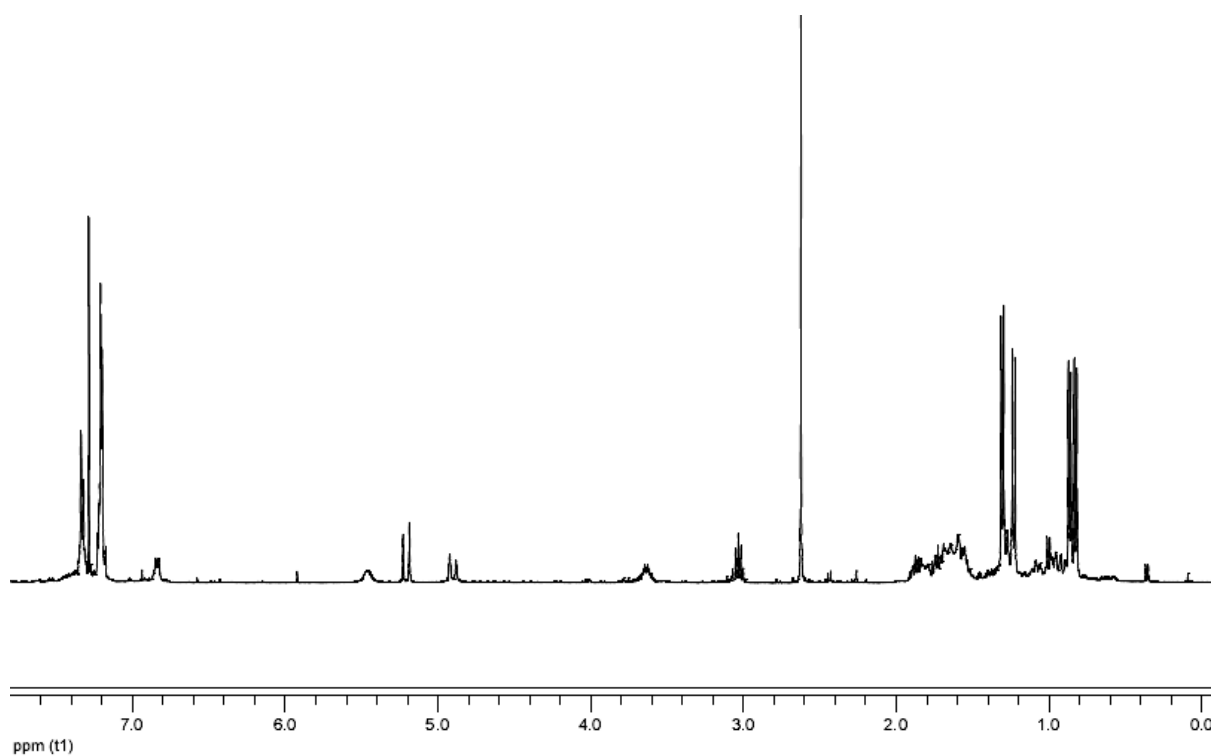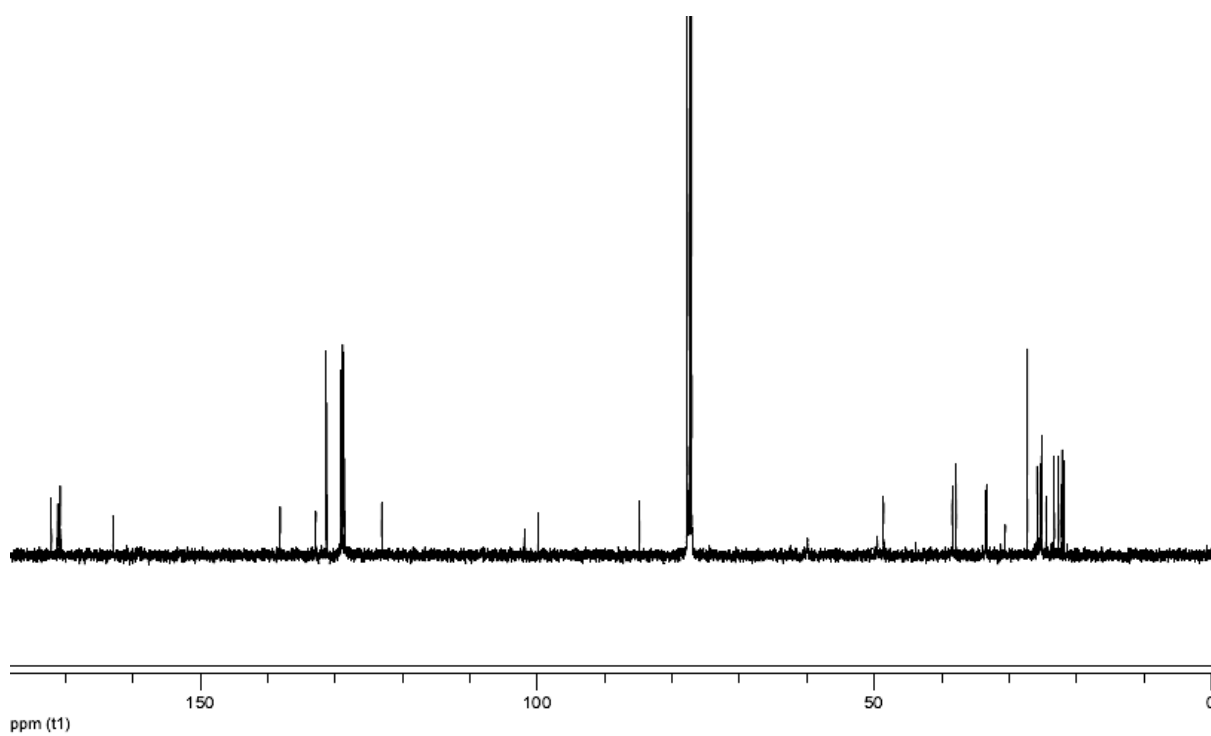

**2-[(4-chlorobenzyl)-(6-methyl-2-phenyl-5-phenylethynylpyrimidin-4-yl)-amino]-4-methylpentanoic acid 4-methoxybenzylamide**

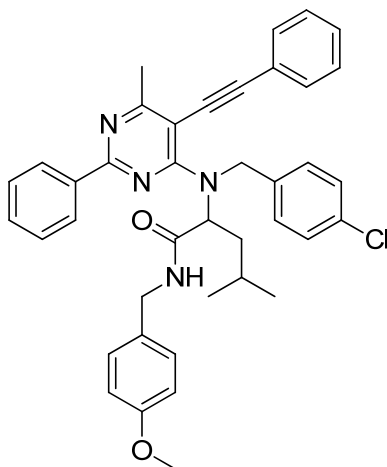

$C_{40}H_{39}ClN_4O_2$   
MW = 643.22 g.mol<sup>-1</sup>

**2e**

General procedure using **1e** (810 mg, 1.21 mmol), phenylacetylene (160  $\mu$ L, 1.45 mmol), *bis*(triphenylphosphine)palladium chloride (44 mg, 0.06 mmol), CuI (12 mg, 0.06 mmol) and diisopropylethylamine (210  $\mu$ L, 1.21 mmol). Purification by flash chromatography (petroleum ether-diethyl ether, 70:30) afforded **2e** as a colorless oil.

**Yield** 66 % (515 mg).

**R<sub>f</sub>** 0.3 (70:30 petroleum ether / diethyl ether).

**<sup>1</sup>H NMR (CDCl<sub>3</sub>, 400 MHz)**  $\delta$  8.26 (d,  $J$  = 7.3 Hz, 2H), 7.54-7.32 (m, 7H), 7.28-7.23 (m, 2H), 7.22-7.15 (m, 4H), 6.91 (d,  $J$  = 8.6 Hz, 2H), 6.66 (d,  $J$  = 8.6 Hz, 2H), 5.55-5.37 (m, 1H), 5.31 (d,  $J$  = 16.4 Hz, 1H), 4.91 (d,  $J$  = 16.4 Hz, 1H), 4.20 (d,  $J$  = 5.4 Hz, 2H), 3.76 (s, 3H), 2.72 (s, 3H), 2.12-2.00 (m, 1H), 1.91-1.80 (m, 1H), 1.68-1.58 (m, 1H), 0.91 (d,  $J$  = 6.6 Hz, 3H), 0.87 (d,  $J$  = 6.6 Hz, 3H).

**<sup>13</sup>C NMR (CDCl<sub>3</sub>, 100.6 MHz)**  $\delta$  171.6, 171.6, 163.3, 160.8, 159.2, 137.7, 137.6, 133.0, 131.3, 131.1, 130.1, 129.5, 129.3, 129.2, 129.0, 128.9, 128.9, 128.6, 123.0, 114.3, 103.2, 101.0, 84.9, 60.9, 55.6, 50.0, 43.7, 38.6, 25.6, 24.7, 23.4, 22.7.

**I.R.** (thin film) 1673, 1513, 1493, 1403 cm<sup>-1</sup>.

**HRMS** Calculated for C<sub>40</sub>H<sub>39</sub>ClN<sub>4</sub>O<sub>2</sub> 642.2762, found 642.2737.

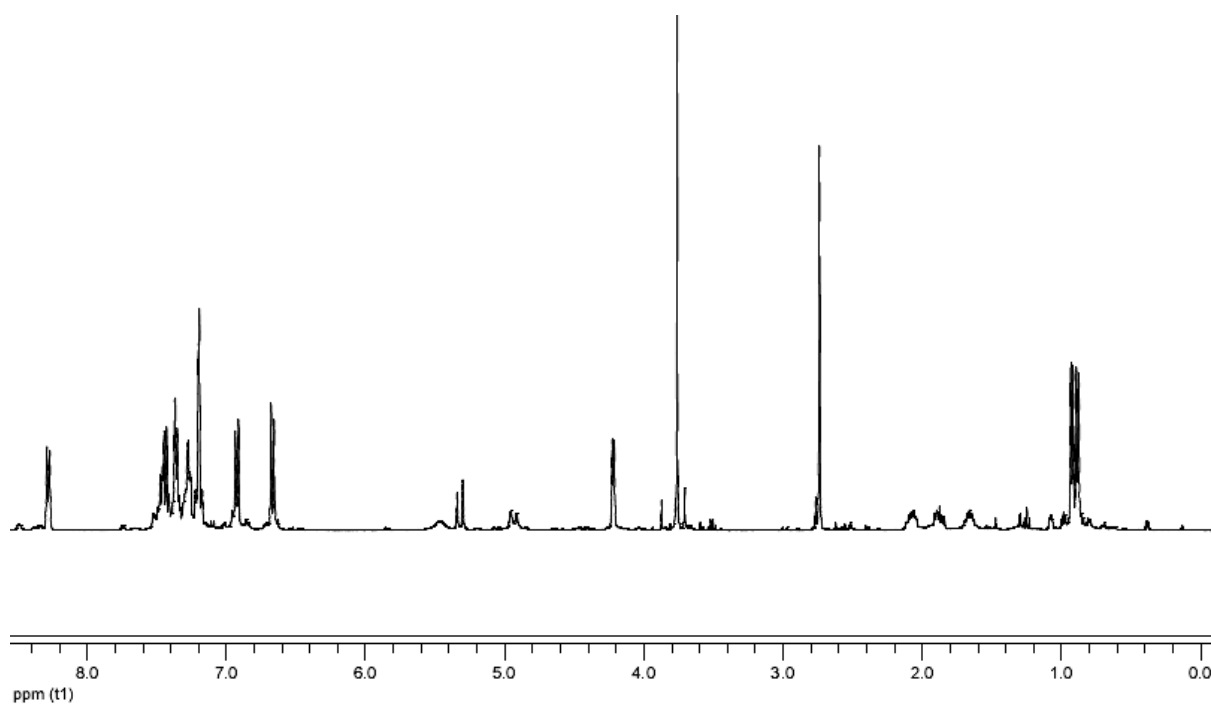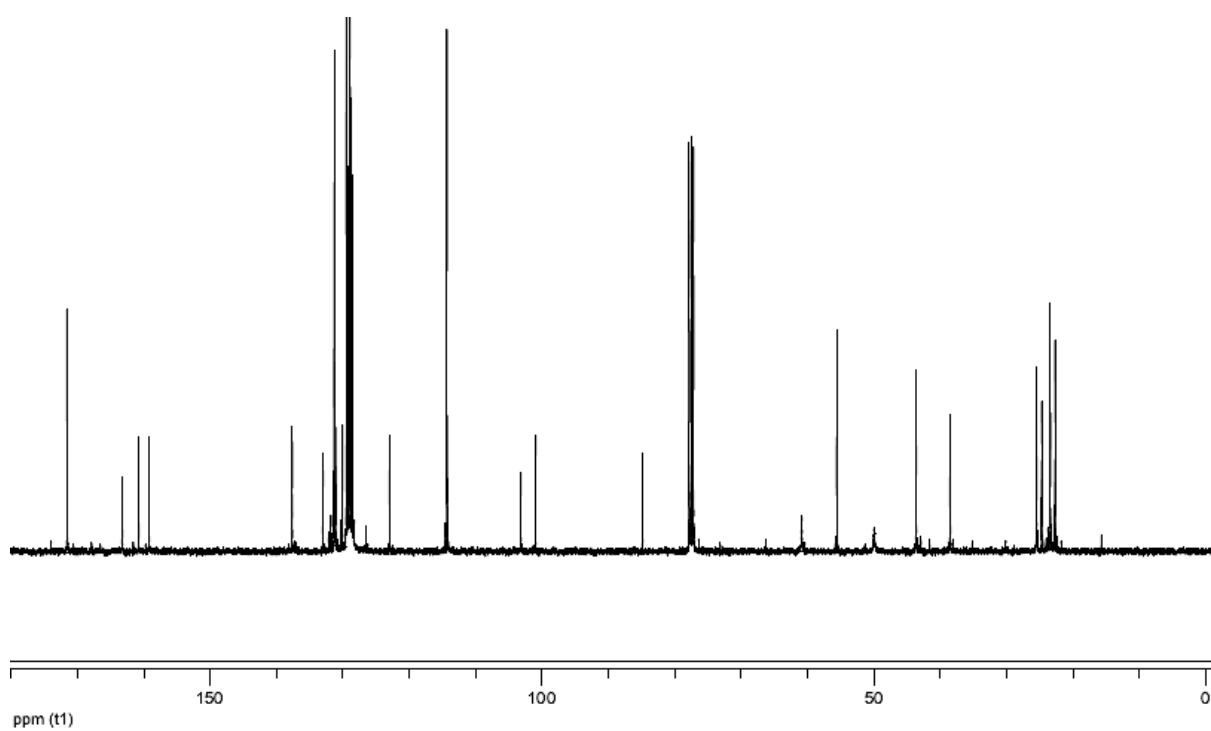

**2-[(4-chlorobenzyl)-(2-isopropyl-6-methyl-5-phenylethynylpyrimidin-4-yl)-amino]-N-(4-methoxybenzyl)-propionamide**

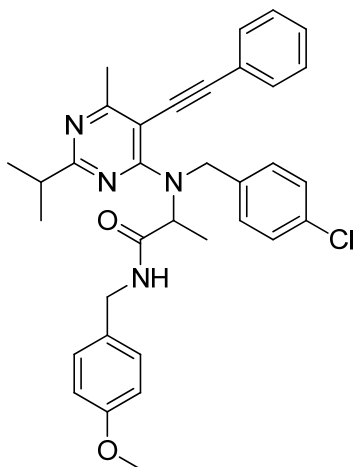

$C_{34}H_{35}ClN_4O_2$   
MW = 567.12 g.mol<sup>-1</sup>

**2f**

General procedure using **1f** (640 mg, 1.08 mmol), phenylacetylene (140  $\mu$ L, 1.30 mmol), *bis*(triphenylphosphine)palladium chloride (38 mg, 0.05 mmol), CuI (11 mg, 0.05 mmol) and diisopropylethylamine (190  $\mu$ L, 1.08 mmol). Purification by flash chromatography (petroleum ether-diethyl ether, 60:40) afforded **2f** as a colorless oil.

**Yield** 71 % (435 mg).

**R<sub>f</sub>** 0.3 (60:40 petroleum ether / diethyl ether).

**<sup>1</sup>H NMR (CDCl<sub>3</sub>, 400 MHz)**  $\delta$  7.32-7.20 (m, 7H), 7.08-7.03 (m, 4H), 6.93 (t,  $J$  = 5.3 Hz, 1H), 6.81 (d,  $J$  = 8.6 Hz, 2H), 5.25-5.16 (m, 1H), 5.15 (d,  $J$  = 16.7 Hz, 1H), 4.98 (d,  $J$  = 16.7 Hz, 1H), 4.32 (dd,  $J$  = 14.4, 5.4 Hz, 1H), 4.27 (dd,  $J$  = 14.4, 5.5 Hz, 1H), 3.80 (s, 3H), 2.94 (sept,  $J$  = 6.9 Hz, 1H), 2.63 (s, 3H), 1.49 (d,  $J$  = 7.0 Hz, 3H), 1.16 (d,  $J$  = 6.9 Hz, 6H).

**<sup>13</sup>C NMR (CDCl<sub>3</sub>, 100.6 MHz)**  $\delta$  172.0, 171.9, 171.1, 162.8, 159.4, 138.4, 133.0, 131.2, 130.3, 129.6, 129.1, 129.0, 128.8, 128.8, 123.0, 114.4, 102.0, 100.0, 84.5, 58.2, 55.7, 50.7, 43.7, 37.9, 24.5, 21.9, 21.8, 15.6.

**I.R.** (thin film) 1661, 1527, 1512, 1493 cm<sup>-1</sup>.

**HRMS** Calculated for C<sub>34</sub>H<sub>35</sub>ClN<sub>4</sub>O<sub>2</sub> 566.2449, found 566.2453.

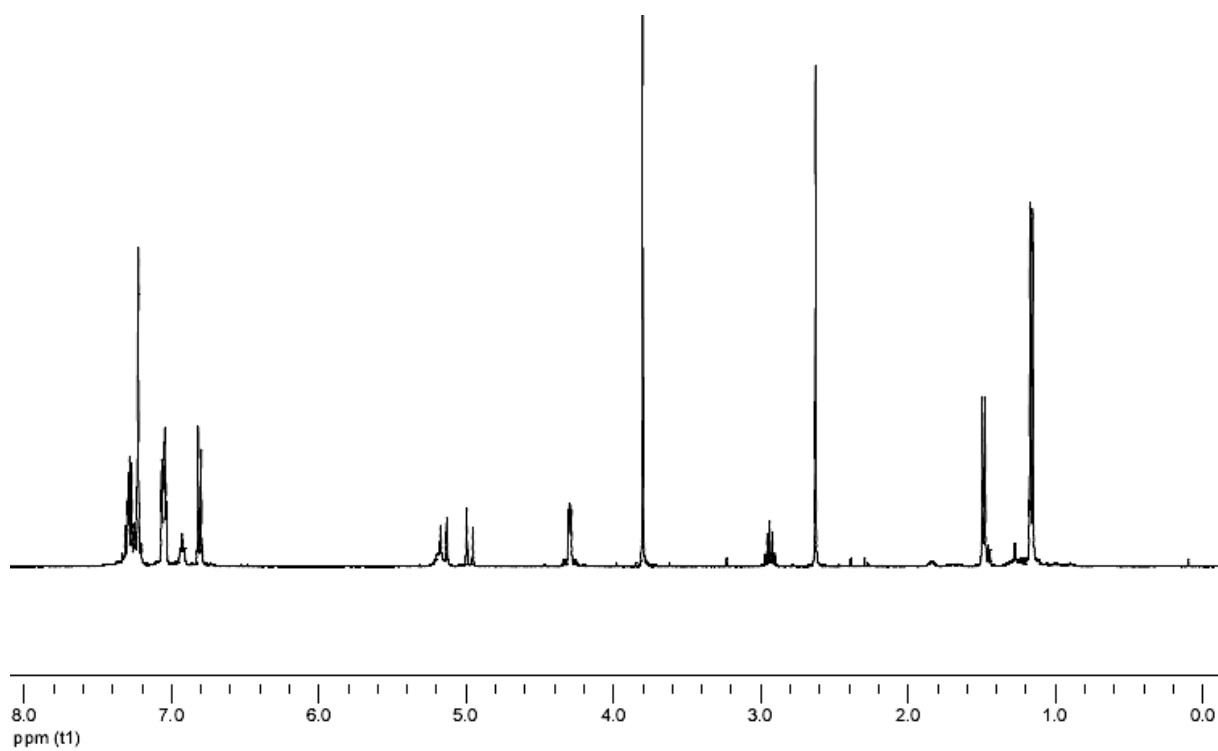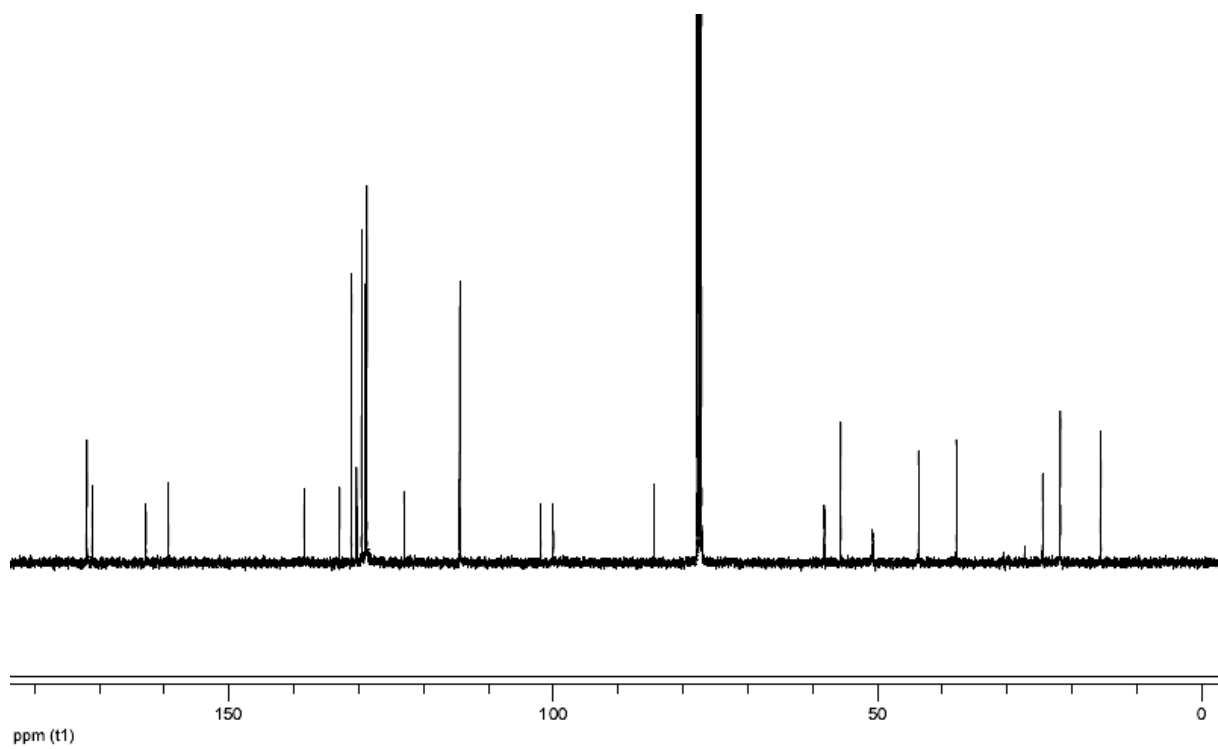

**2-[(4-chlorobenzyl)-(2-isopropyl-6-methyl-5-phenylethynylpyrimidin-4-yl)-amino]-N-(4-methoxybenzyl)-4-phenylbutyramide**

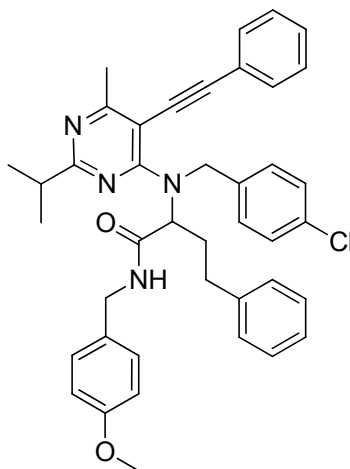

$C_{41}H_{41}ClN_4O_2$   
MW = 657.24 g.mol<sup>-1</sup>

**2g**

General procedure using **1g** (680 mg, 1.00 mmol), phenylacetylene (130  $\mu$ L, 1.20 mmol), *bis*(triphenylphosphine)palladium chloride (35 mg, 0.05 mmol), CuI (10 mg, 0.05 mmol) and diisopropylethylamine (170  $\mu$ L, 1.00 mmol). Purification by flash chromatography (petroleum ether-diethyl ether, 70:30) afforded **2g** as a colorless oil.

**Yield** 68 % (448 mg).

**R<sub>f</sub>** 0.3 (70:30 petroleum ether / diethyl ether).

**<sup>1</sup>H NMR (CDCl<sub>3</sub>, 400 MHz)**  $\delta$  7.36-7.30 (m, 3H), 7.23-7.10 (m, 10H), 7.03 (d,  $J$  = 8.0 Hz, 2H), 7.00 (d,  $J$  = 8.6 Hz, 2H), 6.79 (d,  $J$  = 8.6 Hz, 2H), 5.19 (d,  $J$  = 16.4 Hz, 1H), 5.13-5.05 (m, 1H), 4.90 (d,  $J$  = 16.4 Hz, 1H), 4.25 (dd,  $J$  = 14.4, 5.4 Hz, 1H), 4.21 (dd,  $J$  = 14.4, 5.5 Hz, 1H), 3.80 (s, 3H), 2.89 (sept,  $J$  = 6.9 Hz, 1H), 2.69-2.62 (m, 2H), 2.59 (s, 3H), 2.57-2.45 (m, 1H), 2.22-2.12 (m, 1H), 1.11 (d,  $J$  = 6.9 Hz, 3H), 1.06 (d,  $J$  = 6.9 Hz, 3H).

**<sup>13</sup>C NMR (CDCl<sub>3</sub>, 100.6 MHz)**  $\delta$  172.1, 171.3, 171.1, 163.2, 159.4, 141.2, 137.6, 133.0, 131.2, 130.2, 129.7, 129.4, 129.1, 128.9, 128.8, 128.8, 128.7, 126.5, 123.0, 114.4, 102.2, 100.6, 84.5, 61.3, 55.7, 50.1, 43.6, 37.8, 32.8, 31.1, 24.4, 21.9, 21.7.

**I.R.** (thin film) 1676, 1534, 1513, 1491 cm<sup>-1</sup>.

**HRMS** Calculated for C<sub>41</sub>H<sub>41</sub>ClN<sub>4</sub>O<sub>2</sub> 656.2918, found 656.2922.

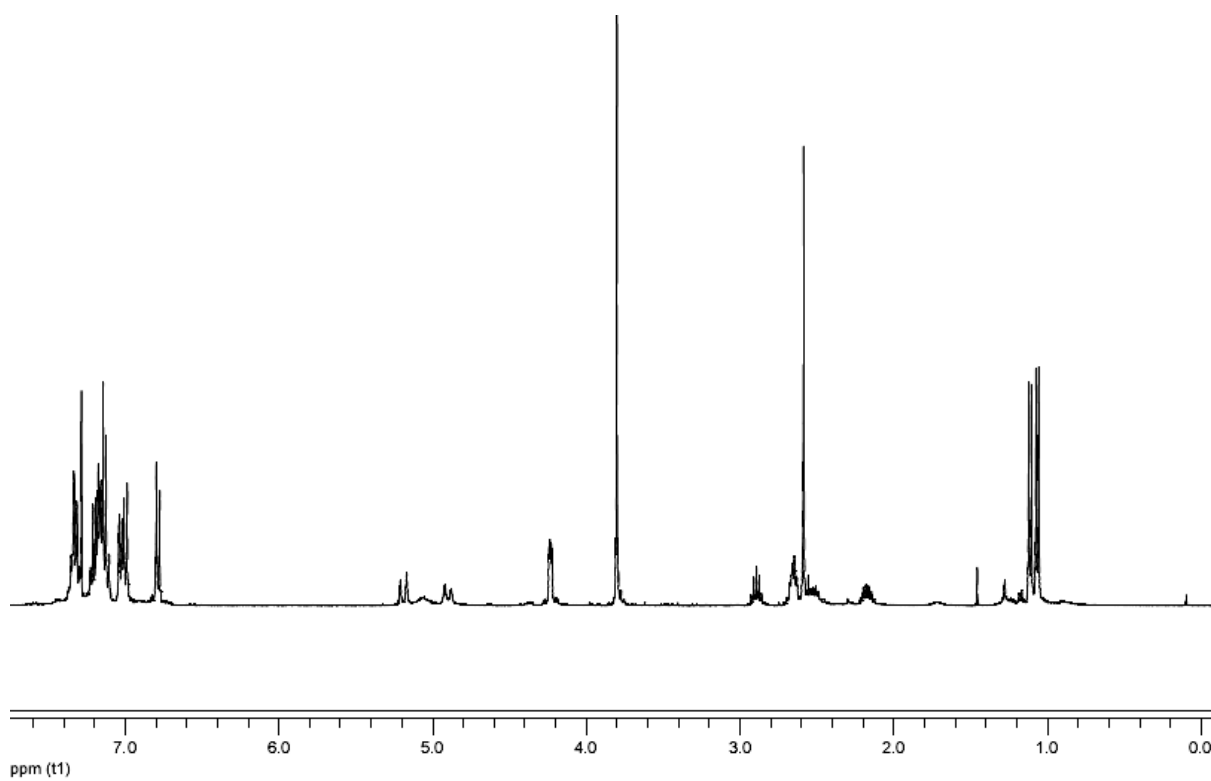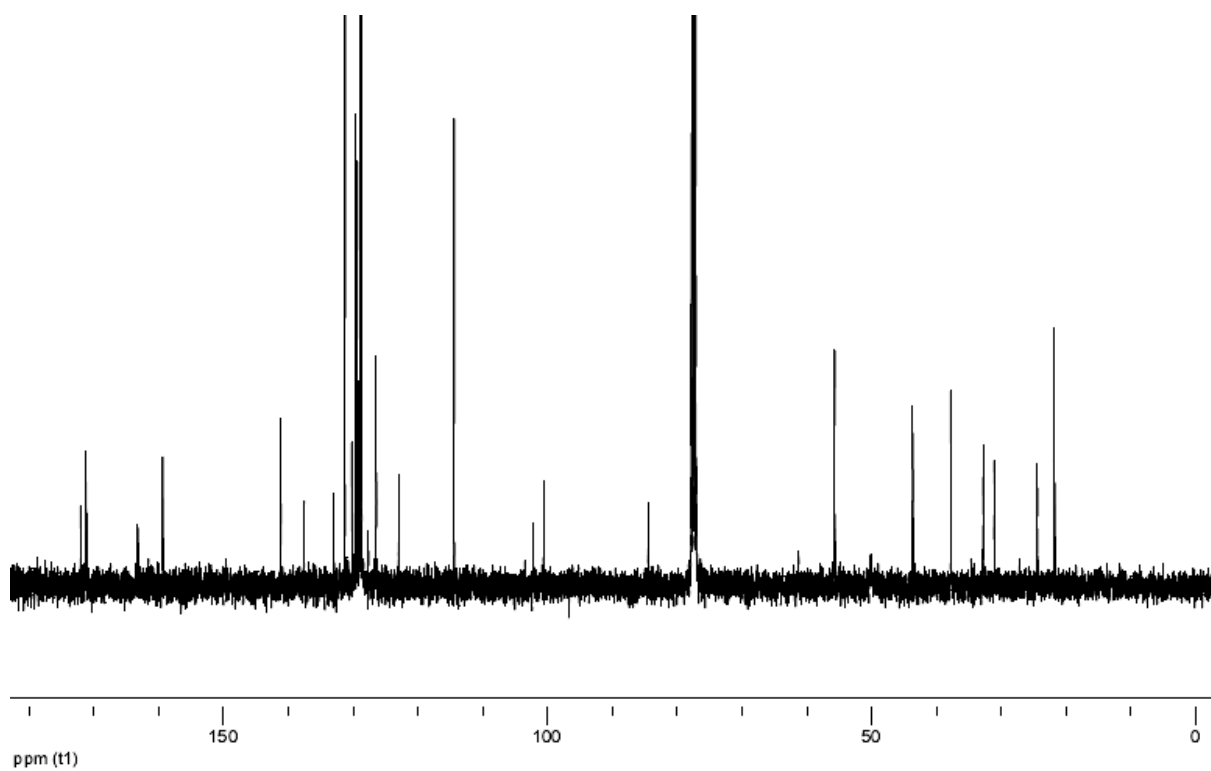



**2-[(4-chlorobenzyl)-(2-isopropyl-6-methyl-5-phenylethynylpyrimidin-4-yl)-amino]-N-(4-methoxybenzyl)-3-methylbutyramide**

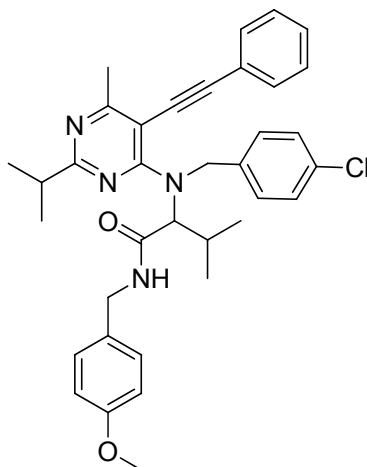

$C_{36}H_{39}ClN_4O_2$   
MW = 595.17 g.mol<sup>-1</sup>

**2h**

General procedure using **1h** (600 mg, 0.97 mmol), phenylacetylene (130  $\mu$ L, 1.20 mmol), *bis*(triphenylphosphine)palladium chloride (35 mg, 0.05 mmol), CuI (10 mg, 0.05 mmol) and diisopropylethylamine (170  $\mu$ L, 0.97 mmol). Purification by flash chromatography (petroleum ether-diethyl ether, 70:30) afforded **2h** as a colorless oil.

**Yield** 74 % (430 mg).

**R<sub>f</sub>** 0.3 (70:30 petroleum ether / diethyl ether).

**<sup>1</sup>H NMR (CDCl<sub>3</sub>, 400 MHz)**  $\delta$  7.40-7.25 (m, 6H), 7.16-7.03 (m, 6H), 6.81 (d,  $J$  = 8.6 Hz, 2H), 5.46 (d,  $J$  = 16.2 Hz, 1H), 4.72 (d,  $J$  = 16.2 Hz, 1H), 4.28 (d,  $J$  = 5.4 Hz, 2H), 3.81 (s, 3H), 2.90 (sept,  $J$  = 6.9 Hz, 1H), 2.77-2.65 (m, 1H), 2.57 (s, 3H), 1.14 (d,  $J$  = 6.9 Hz, 3H), 1.11 (d,  $J$  = 6.9 Hz, 3H), 1.05 (d,  $J$  = 6.6 Hz, 3H), 0.91 (d,  $J$  = 6.6 Hz, 3H).

**<sup>13</sup>C NMR (CDCl<sub>3</sub>, 100.6 MHz)**  $\delta$  172.1, 171.0, 170.9, 163.3, 159.4, 137.3, 132.7, 131.2, 130.4, 129.8, 129.4, 129.2, 129.0, 128.6, 123.0, 114.4, 102.3, 100.4, 85.2, 69.1, 55.7, 49.3, 43.4, 37.8, 28.1, 24.4, 21.8, 20.6, 19.8.

**I.R.** (thin film) 1679, 1530, 1515, 1493 cm<sup>-1</sup>.

**HRMS** Calculated for [C<sub>36</sub>H<sub>39</sub>ClN<sub>4</sub>O<sub>2</sub> - C<sub>9</sub>H<sub>10</sub>NO<sub>2</sub>] 430.2050, found 430.2026.

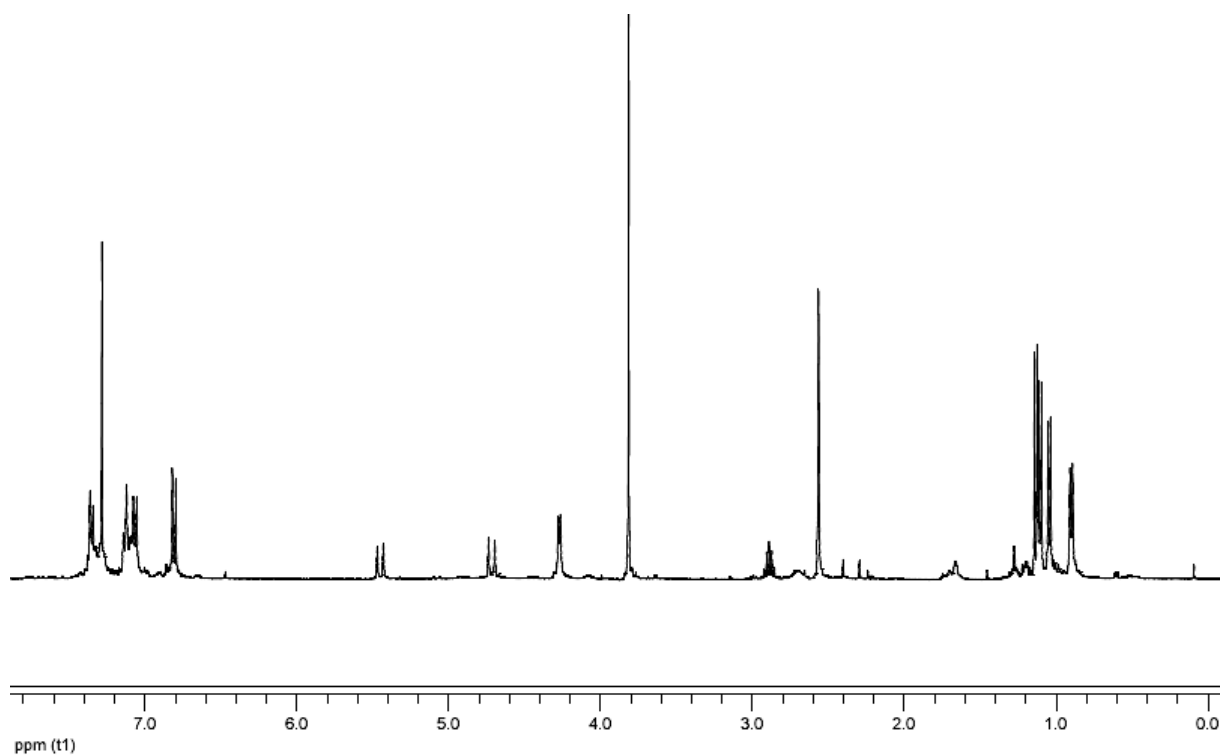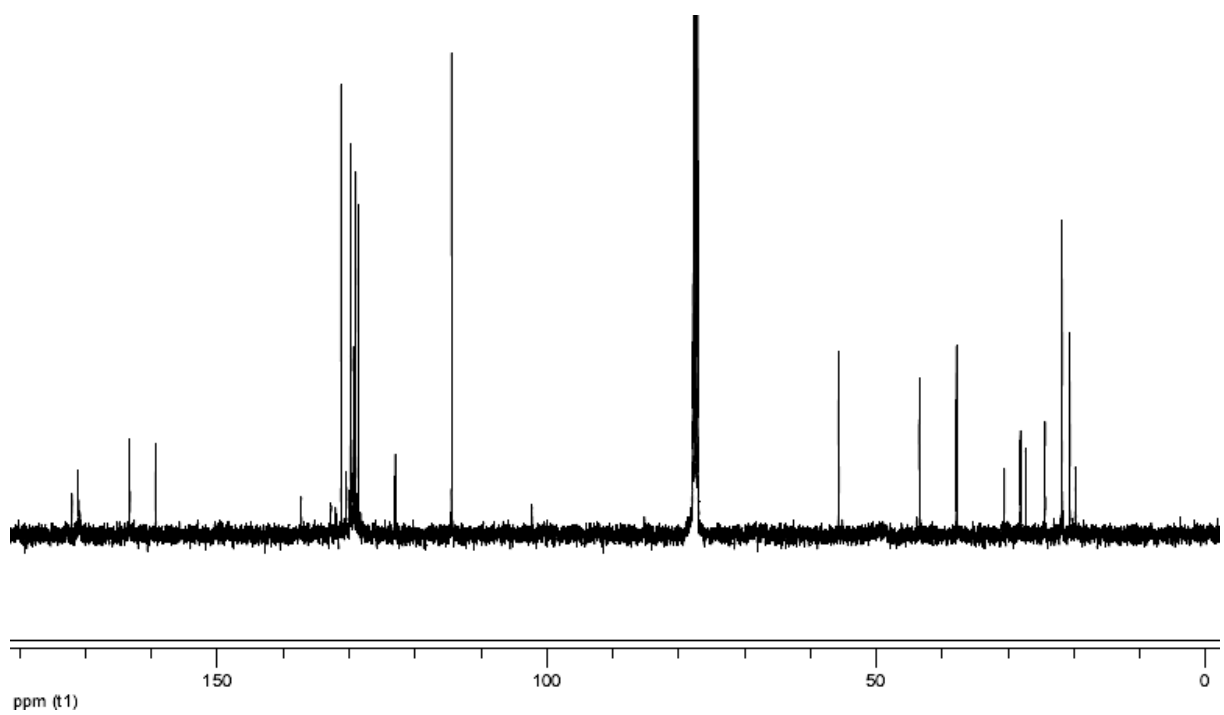

**2-[benzyl-[5-(4-fluorophenylethynyl)-2-isopropyl-6-methylpyrimidin-4-yl]-amino]-N-(4-methoxybenzyl)-4-phenylbutyramide**

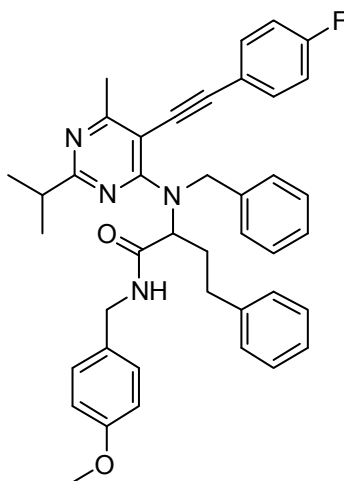

$C_{41}H_{41}FN_4O_2$   
MW = 640.79 g.mol<sup>-1</sup>

**2i**

General procedure using **1i** (610 mg, 0.94 mmol), *p*-fluorophenylacetylene (130  $\mu$ L, 1.13 mmol), *bis*(triphenylphosphine)palladium chloride (33 mg, 0.05 mmol), CuI (10 mg, 0.05 mmol) and diisopropylethylamine (160  $\mu$ L, 0.94 mmol). Purification by flash chromatography (petroleum ether-diethyl ether, 60:40) afforded **2i** as a colorless oil.

**Yield** 62 % (375 mg).

**R<sub>f</sub>** 0.3 (60:40 petroleum ether / diethyl ether).

**<sup>1</sup>H NMR (CDCl<sub>3</sub>, 400 MHz)**  $\delta$  7.31 (t,  $J = 5.3$  Hz, 1H), 7.26-7.22 (m, 5H), 7.22-7.13 (m, 3H), 7.06-6.99 (m, 6H), 6.95 (t,  $J_{H-H} = J_{H-F} = 8.8$  Hz, 2H), 6.78 (d,  $J = 8.6$  Hz, 2H), 5.19 (d,  $J = 16.3$  Hz, 1H), 5.04 (d,  $J = 16.3$  Hz, 1H), 5.00 (br s, 1H), 4.29 (dd,  $J = 14.4, 5.6$  Hz, 1H), 4.15 (dd,  $J = 14.4, 5.2$  Hz, 1H), 3.80 (s, 3H), 2.88 (sept,  $J = 6.9$  Hz, 1H), 2.71-2.62 (m, 2H), 2.59 (s, 3H), 2.57-2.48 (m, 1H), 2.24-2.13 (m, 1H), 1.10 (d,  $J = 6.9$  Hz, 3H), 1.06 (d,  $J = 6.9$  Hz, 3H).

**<sup>13</sup>C NMR (CDCl<sub>3</sub>, 100.6 MHz)**  $\delta$  172.0, 171.4, 171.0, 163.2, 163.0 (d,  $J_{C-F} = 249.6$  Hz), 159.3, 141.4, 139.1, 133.2 (d,  $J_{C-F} = 8.2$  Hz), 130.3, 129.6, 128.8, 128.8, 128.7, 128.0, 127.4, 126.4, 119.2 (d,  $J_{C-F} = 3.3$  Hz), 116.1 (d,  $J_{C-F} = 22.0$  Hz), 114.4, 101.0, 100.2, 84.3, 61.6, 55.7, 51.2, 43.6, 37.8, 33.0, 31.1, 24.5, 21.8, 21.7.

**I.R.** (thin film) 1674, 1529, 1505, 1453 cm<sup>-1</sup>.

**HRMS** Calculated for C<sub>41</sub>H<sub>41</sub>FN<sub>4</sub>O<sub>2</sub> 640.3214, found 640.3246.

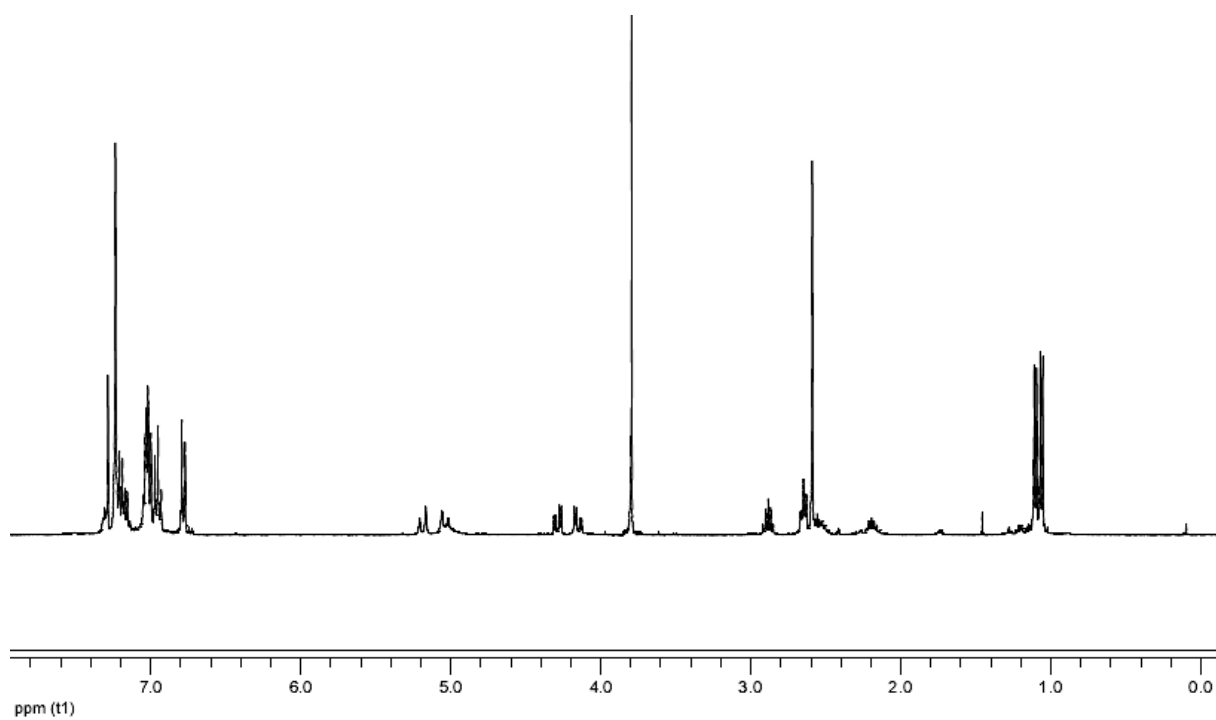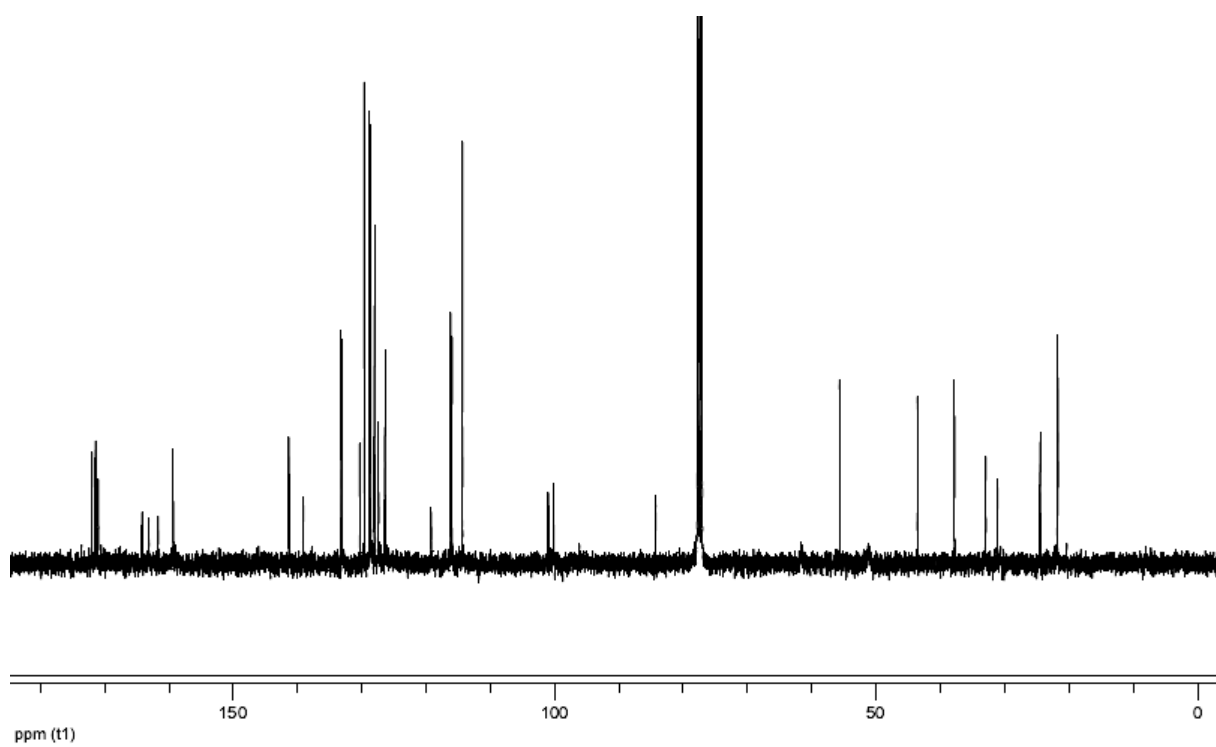

**2-[benzyl-(2-isopropyl-6-methyl-5-phenylethynylpyrimidin-4-yl)-amino]-4-methylpentanoic acid 4-methoxybenzylamide**

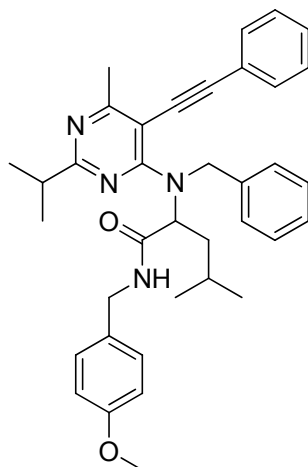

$C_{37}H_{42}N_4O_2$   
MW = 574.75 g.mol<sup>-1</sup>

**2j**

General procedure using **1j** (760 mg, 1.26 mmol), phenylacetylene (170  $\mu$ L, 1.52 mmol), *bis*(triphenylphosphine)palladium chloride (45 mg, 0.06 mmol), CuI (13 mg, 0.06 mmol) and diisopropylethylamine (220  $\mu$ L, 1.26 mmol). Purification by flash chromatography (petroleum ether-diethyl ether, 70:30) afforded **2j** as a colorless oil.

**Yield** 57 % (415 mg).

**R<sub>f</sub>** 0.3 (70:30 petroleum ether / diethyl ether).

**<sup>1</sup>H NMR (CDCl<sub>3</sub>, 400 MHz)**  $\delta$  7.37 (t,  $J$  = 5.6 Hz, 1H), 7.32-7.18 (m, 8H), 7.13 (d,  $J$  = 8.0 Hz, 2H), 7.02 (d,  $J$  = 8.6 Hz, 2H), 6.77 (d,  $J$  = 8.6 Hz, 2H), 5.37-5.26 (br s, 1H), 5.25 (d,  $J$  = 16.4 Hz, 1H), 4.99 (d,  $J$  = 16.4 Hz, 1H), 4.28 (dd,  $J$  = 14.4, 5.5 Hz, 1H), 4.16 (dd,  $J$  = 14.4, 5.3 Hz, 1H), 3.79 (s, 3H), 2.91 (sept,  $J$  = 6.9 Hz, 1H), 2.62 (s, 3H), 2.02-1.91 (m, 1H), 1.87-1.78 (m, 1H), 1.65-1.53 (m, 1H), 1.12 (d,  $J$  = 6.9 Hz, 3H), 1.12 (d,  $J$  = 6.9 Hz, 3H), 0.85 (d,  $J$  = 6.6 Hz, 3H), 0.83 (d,  $J$  = 6.6 Hz, 3H).

**<sup>13</sup>C NMR (CDCl<sub>3</sub>, 100.6 MHz)**  $\delta$  172.0, 171.9, 171.0, 163.1, 159.3, 139.2, 131.2, 130.4, 129.7, 128.9, 128.8, 128.6, 128.0, 127.3, 123.2, 114.4, 102.1, 100.2, 84.8, 60.6, 55.7, 51.0, 43.6, 38.5, 37.8, 25.4, 24.5, 23.3, 22.7, 21.8, 21.8.

**I.R.** (thin film) 1675, 1530, 1513, 1497 cm<sup>-1</sup>.

**HRMS** Calculated for C<sub>37</sub>H<sub>42</sub>N<sub>4</sub>O<sub>2</sub> 574.3308, found 574.3338.

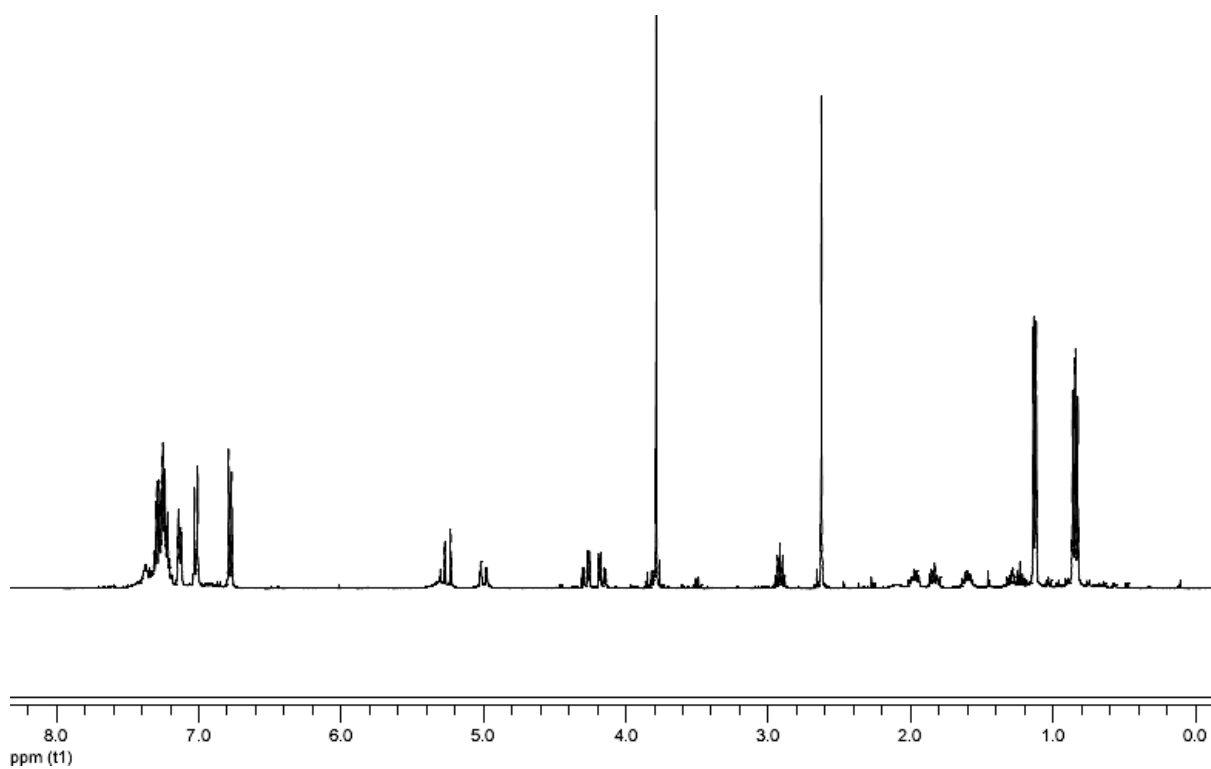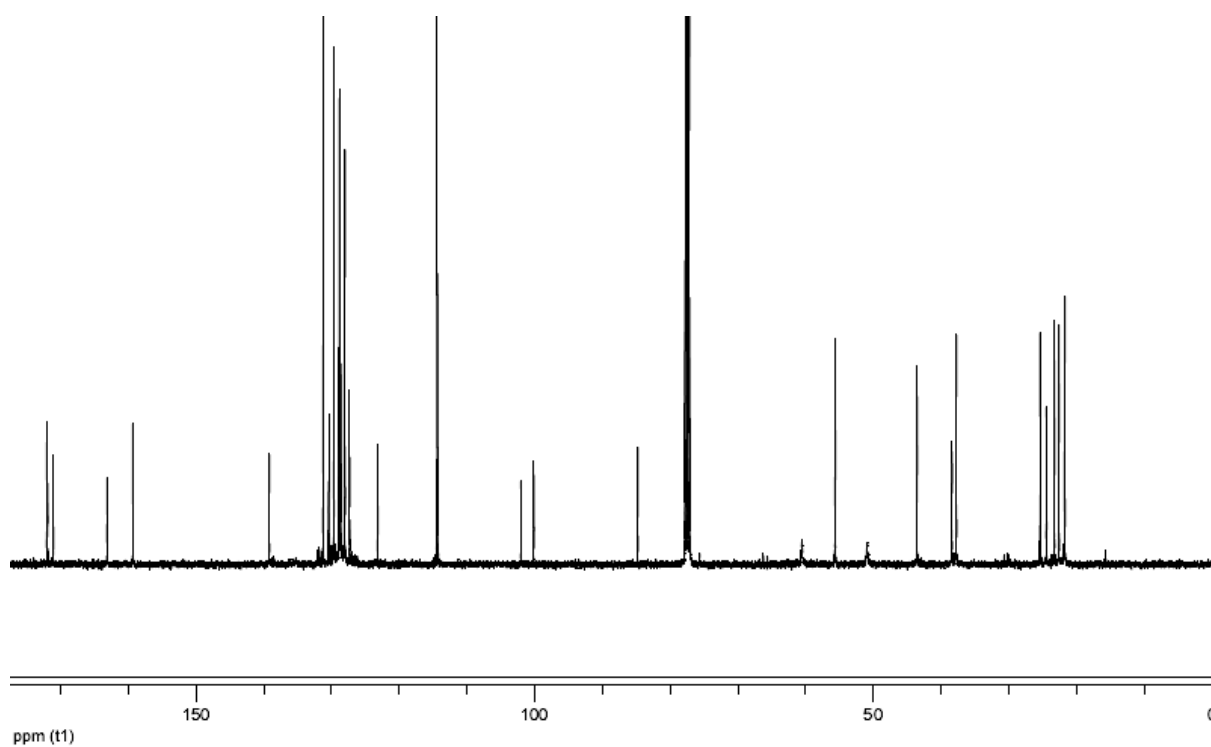

**2-[(4-fluorobenzyl)-(2-isopropyl-6-methyl-5-phenylethynylpyrimidin-4-yl)-amino]-4-methylpentanoic acid 4-methoxybenzylamide**

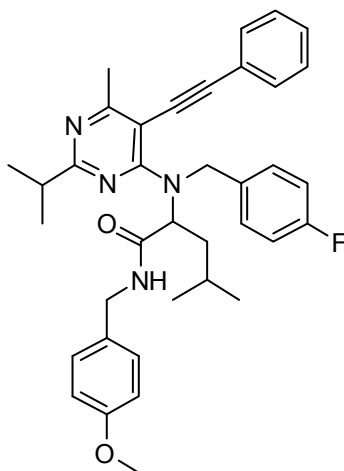

$C_{37}H_{41}FN_4O_2$   
MW = 592.75 g.mol<sup>-1</sup>

**2k**

General procedure using **1k** (740 mg, 1.20 mmol), phenylacetylene (160  $\mu$ L, 1.44 mmol), *bis*(triphenylphosphine)palladium chloride (45 mg, 0.06 mmol), CuI (12 mg, 0.06 mmol) and diisopropylethylamine (210  $\mu$ L, 1.20 mmol). Purification by flash chromatography (petroleum ether-diethyl ether, 70:30) afforded **2k** as a colorless oil.

**Yield** 58 % (413 mg).

**R<sub>f</sub>** 0.3 (70:30 petroleum ether / diethyl ether).

**<sup>1</sup>H NMR (CDCl<sub>3</sub>, 400 MHz)**  $\delta$  7.40-7.29 (m, 4H), 7.23-7.16 (m, 4H), 7.02 (d,  $J$  = 8.6 Hz, 2H), 6.89 (t,  $J_{H-H} = J_{H-F} = 8.7$  Hz, 2H), 6.78 (d,  $J$  = 8.6 Hz, 2H), 5.37-5.27 (m, 1H), 5.22 (d,  $J$  = 16.2 Hz, 1H), 4.90 (d,  $J$  = 16.2 Hz, 1H), 4.27 (dd,  $J$  = 14.3, 5.4 Hz, 1H), 4.20 (dd,  $J$  = 14.3, 5.5 Hz, 1H), 3.80 (s, 3H), 2.92 (sept,  $J$  = 6.9 Hz, 1H), 2.62 (s, 3H), 1.99-1.90 (m, 1H), 1.85-1.75 (m, 1H), 1.62-1.52 (m, 1H), 1.14 (d,  $J$  = 6.9 Hz, 3H), 1.13 (d,  $J$  = 6.9 Hz, 3H), 0.86 (d,  $J$  = 6.6 Hz, 3H), 0.82 (d,  $J$  = 6.6 Hz, 3H).

**<sup>13</sup>C NMR (CDCl<sub>3</sub>, 100.6 MHz)**  $\delta$  172.1, 171.8, 171.1, 163.1, 162.2 (d,  $J_{C-F} = 245.2$  Hz), 159.4, 134.9 (d,  $J_{C-F} = 2.9$  Hz), 131.2, 130.4, 129.6 (d,  $J_{C-F} = 8.1$  Hz), 129.6, 129.1, 128.9, 115.4 (d,  $J_{C-F} = 20.5$  Hz), 114.4, 102.1, 100.2, 84.8, 60.5, 55.7, 50.1, 43.6, 38.5, 37.8, 25.4, 24.5, 23.3, 22.6, 21.8, 21.7.

**I.R.** (thin film) 1669, 1530, 1511, 1495 cm<sup>-1</sup>.

**HRMS** Calculated for C<sub>37</sub>H<sub>41</sub>FN<sub>4</sub>O<sub>2</sub> 592.3214, found 592.3216.

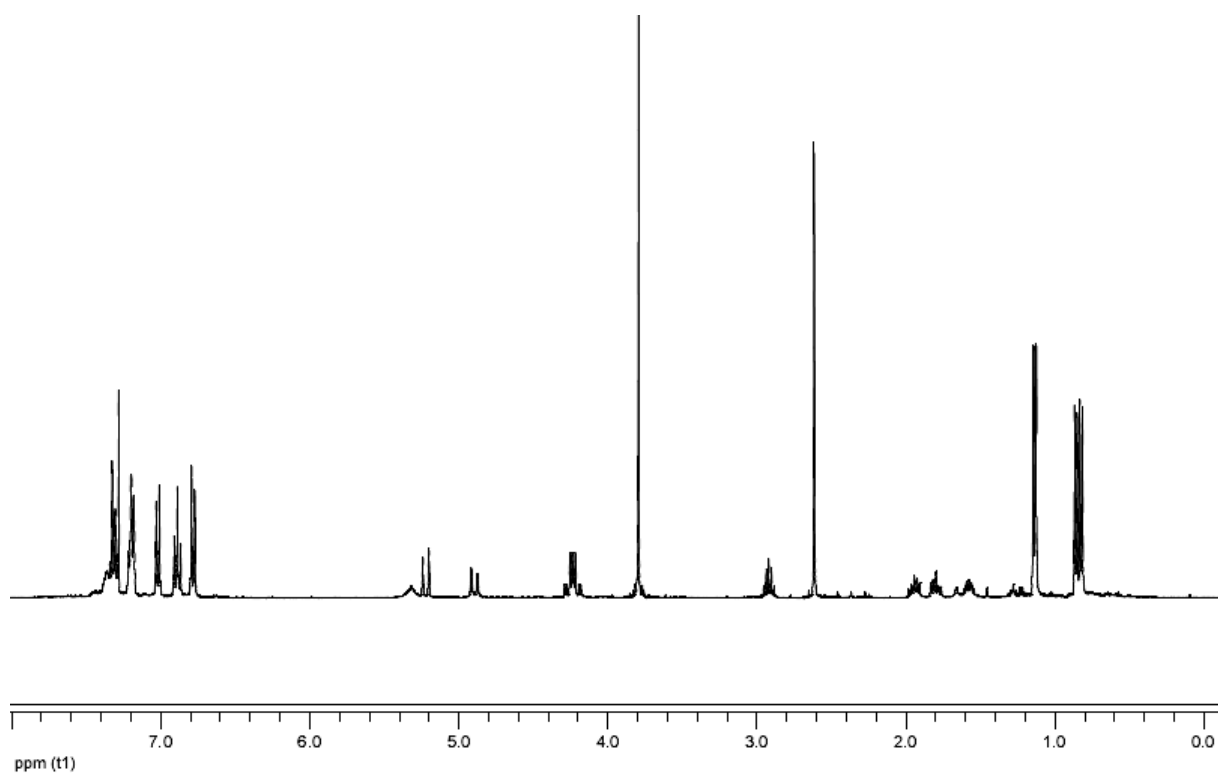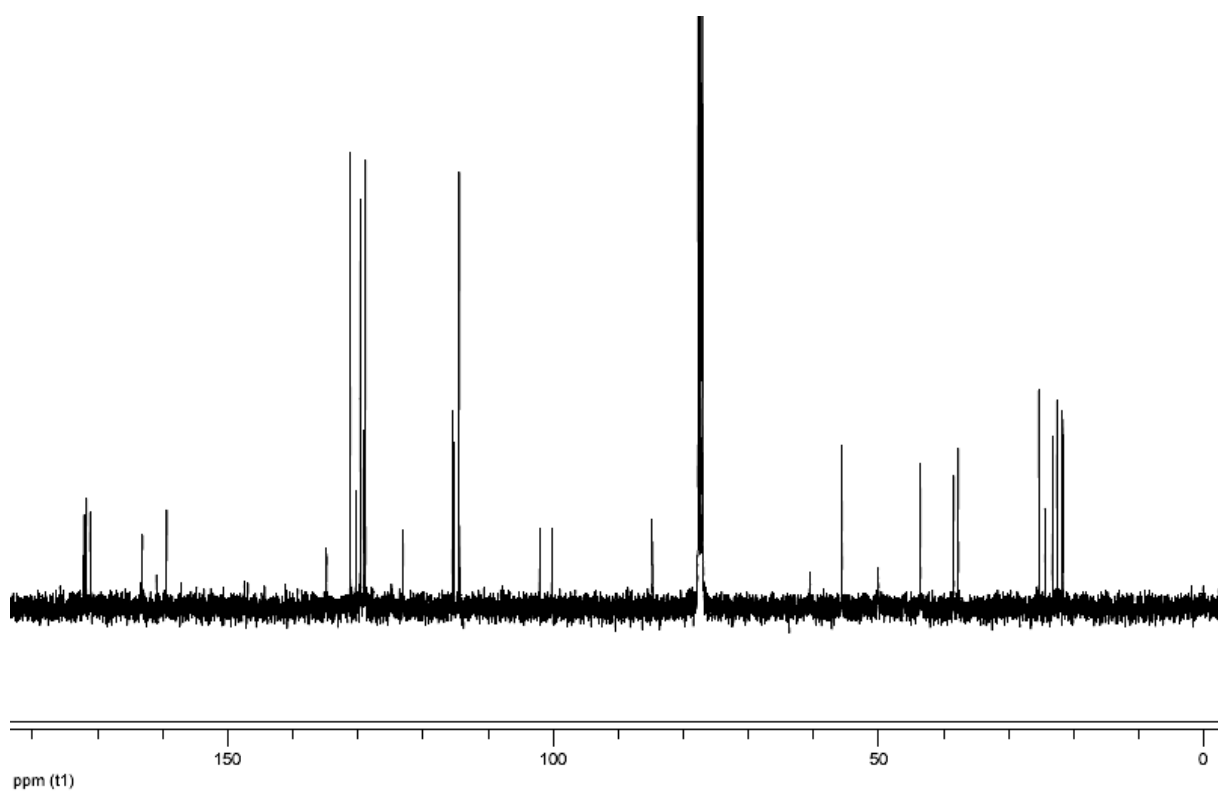



**2-[(2-chlorobenzyl)-[5-(4-fluorophenylethynyl)-2-isopropyl-6-methylpyrimidin-4-yl]-amino]-N-(4-methoxybenzyl)-propionamide**

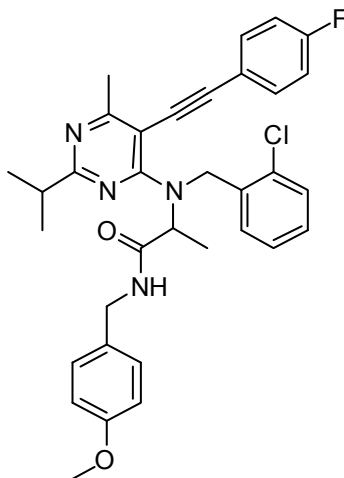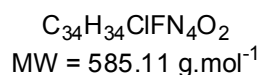

**21**

General procedure using **11** (590 mg, 1.00 mmol), phenylacetylene (140  $\mu$ L, 1.20 mmol), *bis*(triphenylphosphine)palladium chloride (35 mg, 0.05 mmol), CuI (10 mg, 0.05 mmol) and diisopropylethylamine (170  $\mu$ L, 1.00 mmol). Purification by flash chromatography (petroleum ether-diethyl ether, 60:40) afforded **21** as a colorless oil.

**Yield** 60 % (385 mg).

**R<sub>f</sub>** 0.3 (60:40 petroleum ether / diethyl ether).

**<sup>1</sup>H NMR (CDCl<sub>3</sub>, 400 MHz)**  $\delta$  7.34 (dd,  $J = 7.7, 1.8$  Hz, 1H), 7.27 (dd,  $J = 7.7, 1.8$  Hz, 1H), 7.20-7.13 (m, 2H), 7.11 (d,  $J = 8.6$  Hz, 2H), 6.98 (dd,  $J_{H-H, H-F} = 8.8, 5.5$  Hz, 2H), 6.95-6.87 (m, 3H), 6.81 (d,  $J = 8.6$  Hz, 2H), 5.27 (d,  $J = 17.9$  Hz, 1H), 5.23 (br s, 1H), 5.03 (d,  $J = 17.9$  Hz, 1H), 4.36 (dd,  $J = 14.4, 5.6$  Hz, 1H), 4.31 (dd,  $J = 14.4, 5.4$  Hz, 1H), 3.80 (s, 3H), 2.92 (sept,  $J = 6.9$  Hz, 1H), 2.60 (s, 3H), 1.51 (d,  $J = 7.0$  Hz, 3H), 1.15 (d,  $J = 6.9$  Hz, 3H), 1.14 (d,  $J = 6.9$  Hz, 3H).

**<sup>13</sup>C NMR (CDCl<sub>3</sub>, 100.6 MHz)**  $\delta$  172.0, 172.0, 171.2, 162.9 (d,  $J_{C-F} = 250.3$  Hz), 162.7, 159.4, 137.4, 133.2 (d,  $J_{C-F} = 8.2$  Hz), 132.7, 130.5, 129.6, 129.6, 128.8, 128.3, 127.0, 119.1 (d,  $J_{C-F} = 3.5$  Hz), 115.9 (d,  $J_{C-F} = 22.1$  Hz), 114.4, 100.4, 99.4, 84.1, 58.2, 55.7, 49.9, 43.6, 37.8, 24.6, 21.8, 21.7, 15.6.

**I.R.** (thin film) 1660, 1530, 1506, 1467 cm<sup>-1</sup>.

**HRMS** Calculated for C<sub>34</sub>H<sub>34</sub>ClFN<sub>4</sub>O<sub>2</sub> 584.2354, found 584.2351.

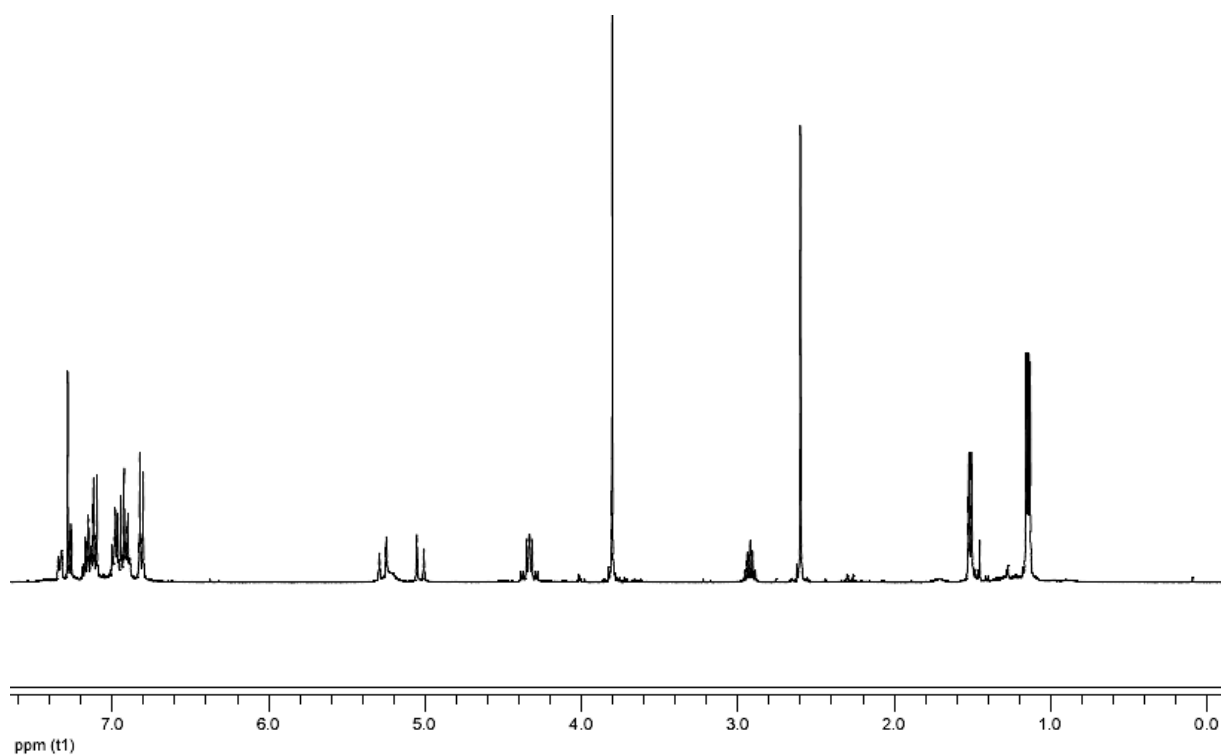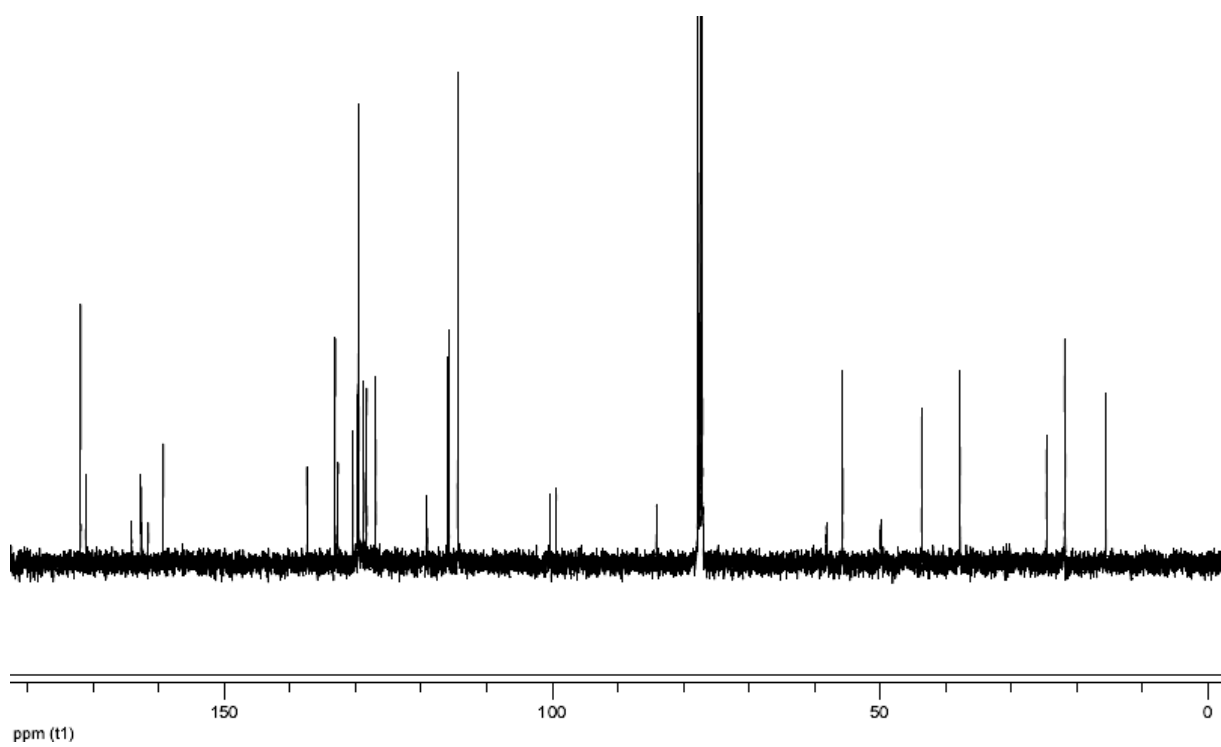

***N*-(4-chlorobenzyl)-2-[(2-isopropyl-6-methyl-5-phenylethynylpyrimidin-4-yl)-(4-methylbenzyl)-amino]-butyramide**

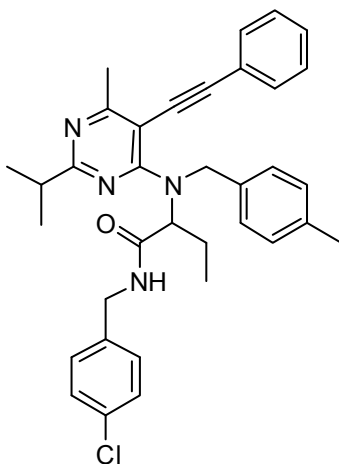

$C_{35}H_{37}ClN_4O$   
MW = 565.15 g.mol<sup>-1</sup>

**2m**

General procedure using **1m** (650 mg, 1.10 mmol), phenylacetylene (150  $\mu$ L, 1.32 mmol), *bis*(triphenylphosphine)palladium chloride (40 mg, 0.06 mmol), CuI (11 mg, 0.06 mmol) and diisopropylethylamine (190  $\mu$ L, 1.10 mmol). Purification by flash chromatography (petroleum ether-diethyl ether, 70:30) afforded **2m** as a colorless oil.

**Yield** 55 % (342 mg).

**R<sub>f</sub>** 0.3 (70:30 petroleum ether / diethyl ether).

**<sup>1</sup>H NMR (CDCl<sub>3</sub>, 400 MHz)**  $\delta$  7.45 (t, *J* = 5.6 Hz, 1H), 7.32-7.25 (m, 3H), 7.20 (d, *J* = 8.4 Hz, 2H), 7.17-7.12 (m, 4H), 7.03 (d, *J* = 7.9 Hz, 2H), 6.99 (d, *J* = 8.4 Hz, 2H), 5.21 (d, *J* = 16.2 Hz, 1H), 4.96 (d, *J* = 16.2 Hz, 1H), 4.93-4.84 (m, 1H), 4.30 (dd, *J* = 14.7, 5.8 Hz, 1H), 4.18 (dd, *J* = 14.7, 5.6 Hz, 1H), 2.93 (sept, *J* = 6.9 Hz, 1H), 2.64 (s, 3H), 2.31 (s, 3H), 2.25-2.16 (m, 1H), 2.02-1.92 (m, 1H), 1.16 (d, *J* = 6.9 Hz, 3H), 1.14 (d, *J* = 6.9 Hz, 3H), 0.92 (t, *J* = 7.4 Hz, 3H).

**<sup>13</sup>C NMR (CDCl<sub>3</sub>, 100.6 MHz)**  $\delta$  172.0, 171.9, 171.1, 163.3, 137.0, 137.0, 136.0, 133.5, 131.3, 129.6, 129.4, 129.1, 128.9, 128.8, 128.0, 123.2, 102.2, 100.3, 84.8, 64.9, 51.0, 43.3, 37.8, 24.5, 23.0, 21.8, 21.4, 11.8.

**I.R.** (thin film) 1672, 1526, 1491, 1409 cm<sup>-1</sup>.

**HRMS** Calculated for C<sub>35</sub>H<sub>37</sub>ClN<sub>4</sub>O 564.2656, found 564.2671.

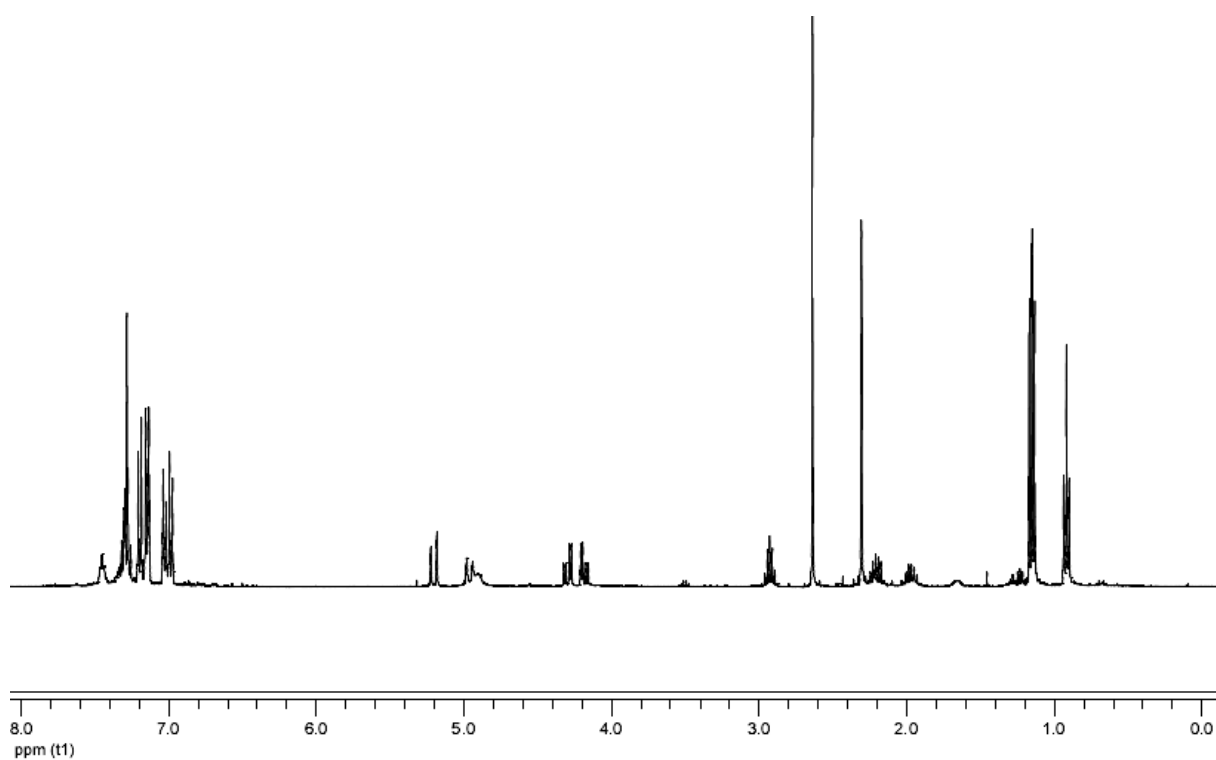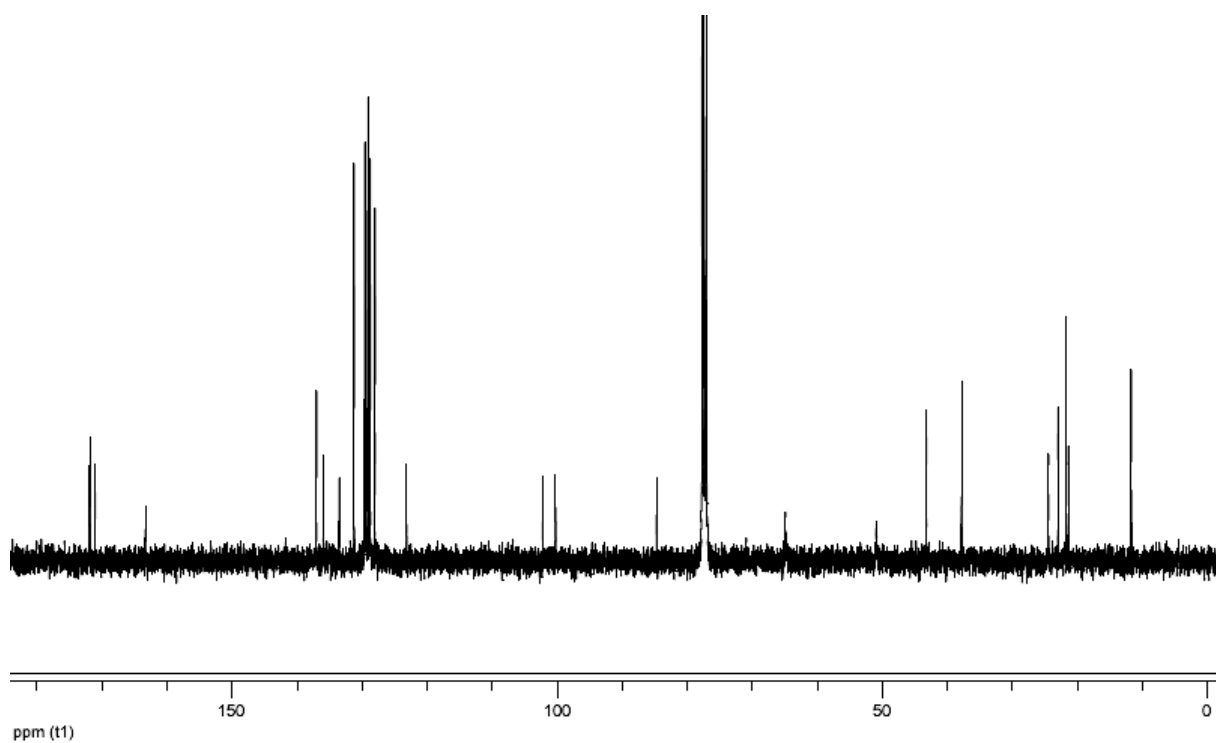

**2-[(2-isopropyl-6-methyl-5-phenylethynylpyrimidin-4-yl)-(4-methoxybenzyl)-amino]-4-methylpentanoic acid 4-chlorobenzylamide**

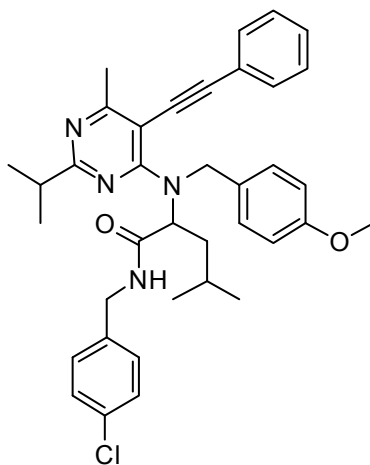

$C_{37}H_{41}ClN_4O_2$   
MW = 609.20 g.mol<sup>-1</sup>

**2n**

General procedure using **1n** (670 mg, 1.06 mmol), phenylacetylene (140  $\mu$ L, 1.7 mmol), *bis*(triphenylphosphine)palladium chloride (37 mg, 0.05 mmol), CuI (11 mg, 0.05 mmol) and diisopropylethylamine (180  $\mu$ L, 1.06 mmol). Purification by flash chromatography (petroleum ether-diethyl ether, 70:30) afforded **2n** as a colorless oil.

**Yield** 61 % (394 mg).

**R<sub>f</sub>** 0.3 (70:30 petroleum ether / diethyl ether).

**<sup>1</sup>H NMR (CDCl<sub>3</sub>, 400 MHz)**  $\delta$  7.51 (t,  $J$  = 5.3 Hz, 1H), 7.37-7.27 (m, 3H), 7.24-7.15 (m, 6H), 6.99 (d,  $J$  = 8.4 Hz, 2H), 6.75 (d,  $J$  = 8.7 Hz, 2H), 5.27-5.04 (m, 1H), 5.21 (d,  $J$  = 15.8 Hz, 1H), 4.93 (d,  $J$  = 15.8 Hz, 1H), 4.29 (dd,  $J$  = 14.7, 5.8 Hz, 1H), 4.17 (dd,  $J$  = 14.7, 5.5 Hz, 1H), 3.77 (s, 3H), 2.94 (sept,  $J$  = 6.9 Hz, 1H), 2.64 (s, 3H), 2.04-1.94 (m, 1H), 1.94-1.83 (m, 1H), 1.60 (sept,  $J$  = 6.6 Hz, 1H), 1.16 (d,  $J$  = 6.9 Hz, 3H), 1.15 (d,  $J$  = 6.9 Hz, 3H), 0.88 (d,  $J$  = 6.6 Hz, 3H), 0.84 (d,  $J$  = 6.6 Hz, 3H).

**<sup>13</sup>C NMR (CDCl<sub>3</sub>, 100.6 MHz)**  $\delta$  172.3, 172.0, 171.1, 163.1, 159.1, 137.0, 133.5, 131.3, 130.8, 129.7, 129.5, 129.1, 129.0, 128.9, 123.2, 114.1, 102.3, 100.4, 84.8, 60.9, 55.7, 50.5, 43.3, 38.4, 37.8, 25.4, 24.5, 23.4, 22.6, 21.9.

**I.R.** (thin film) 1676, 1530, 1512, 1492 cm<sup>-1</sup>.

**HRMS** Calculated for C<sub>37</sub>H<sub>41</sub>ClN<sub>4</sub>O<sub>2</sub> 608.2918, found 608.2940.

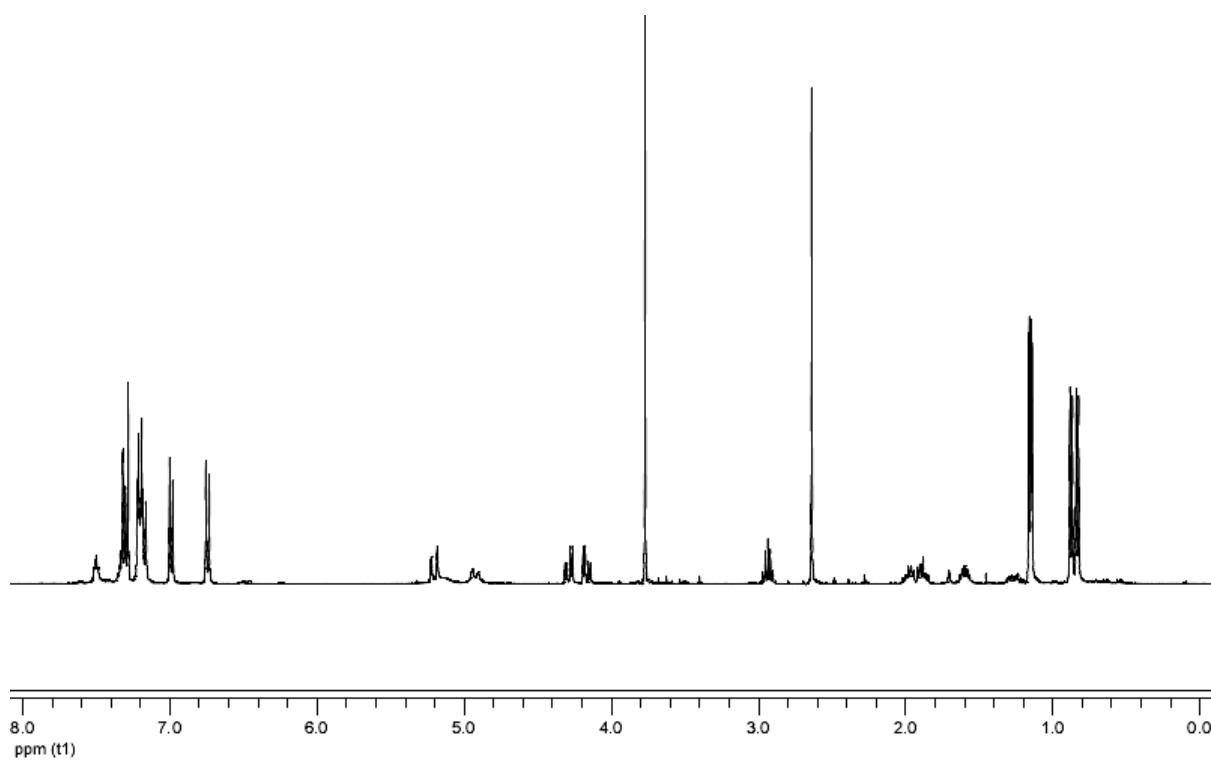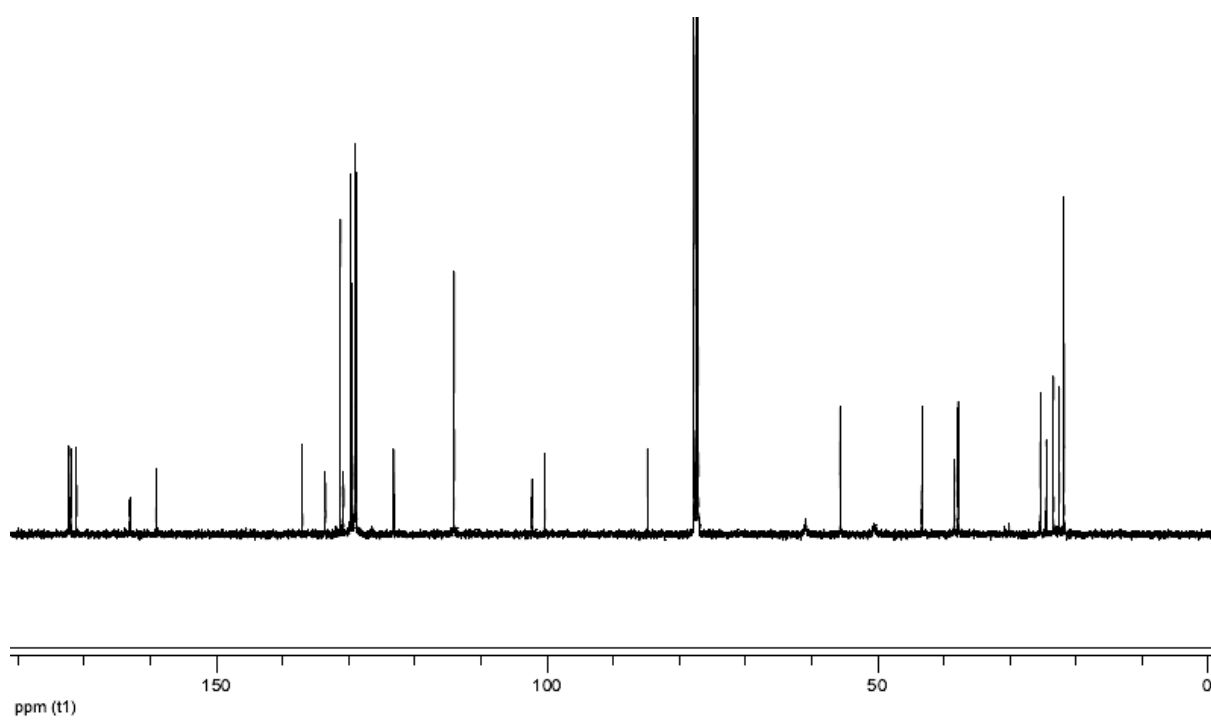

**2-[(2-isopropyl-6-methyl-5-phenylethynylpyrimidin-4-yl)-pyridin-3-ylmethylamino]-N-(4-methoxybenzyl)-butyramide**

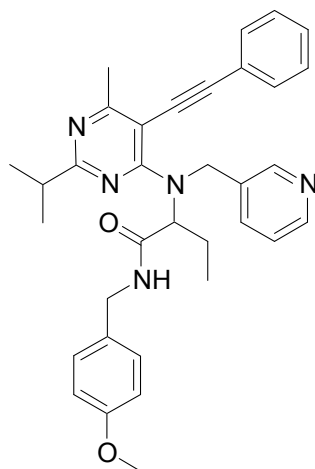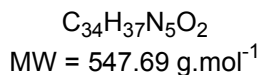

General procedure using **1o** (390 mg, 0.68 mmol), phenylacetylene (90  $\mu$ L, 0.82 mmol), *bis*(triphenylphosphine)palladium chloride (25 mg, 0.03 mmol), CuI (3 mg, 0.03 mmol) and diisopropylethylamine (120  $\mu$ L, 0.68 mmol). Purification by flash chromatography (diethyl ether) afforded **2o** as a colorless oil.

**Yield** 58 % (216 mg).

**R<sub>f</sub>** 0.3 (diethyl ether).

**<sup>1</sup>H NMR (CDCl<sub>3</sub>, 400 MHz)**  $\delta$  8.56 (s, 1H), 8.43 (d,  $J$  = 4.7 Hz, 1H), 7.49 (d,  $J$  = 7.9 Hz, 1H), 7.38-7.29 (m, 4H), 7.22 (d,  $J$  = 7.3 Hz, 2H), 7.10 (dd,  $J$  = 7.9, 4.7 Hz, 1H), 7.04 (d,  $J$  = 8.4 Hz, 2H), 6.78 (d,  $J$  = 8.4 Hz, 2H), 5.25 (d,  $J$  = 16.3 Hz, 1H), 5.19 (t,  $J$  = 7.6 Hz, 1H), 4.85 (d,  $J$  = 16.3 Hz, 1H), 4.29 (dd,  $J$  = 14.4, 5.6 Hz, 1H), 4.24 (dd,  $J$  = 14.4, 5.8 Hz, 1H), 3.78 (s, 3H), 2.90 (sept,  $J$  = 6.9 Hz, 1H), 2.60 (s, 3H), 2.21-2.09 (m, 1H), 1.96-1.84 (m, 1H), 1.13 (d,  $J$  = 6.9 Hz, 3H), 1.10 (d,  $J$  = 6.9 Hz, 3H), 0.91 (t,  $J$  = 7.4 Hz, 3H).

**<sup>13</sup>C NMR (CDCl<sub>3</sub>, 100.6 MHz)**  $\delta$  172.2, 171.2, 171.2, 163.4, 159.4, 149.6, 148.5, 135.4, 134.9, 131.2, 130.3, 129.7, 129.2, 128.9, 123.4, 122.9, 114.5, 102.4, 100.4, 84.6, 64.2, 55.7, 48.2, 43.6, 37.8, 24.4, 23.2, 21.8, 21.7, 11.5.

**I.R.** (thin film) 1675, 1527, 1514, 1492 cm<sup>-1</sup>.

**HRMS** Calculated for C<sub>34</sub>H<sub>37</sub>N<sub>5</sub>O<sub>2</sub> 547.2947, found 547.2960.

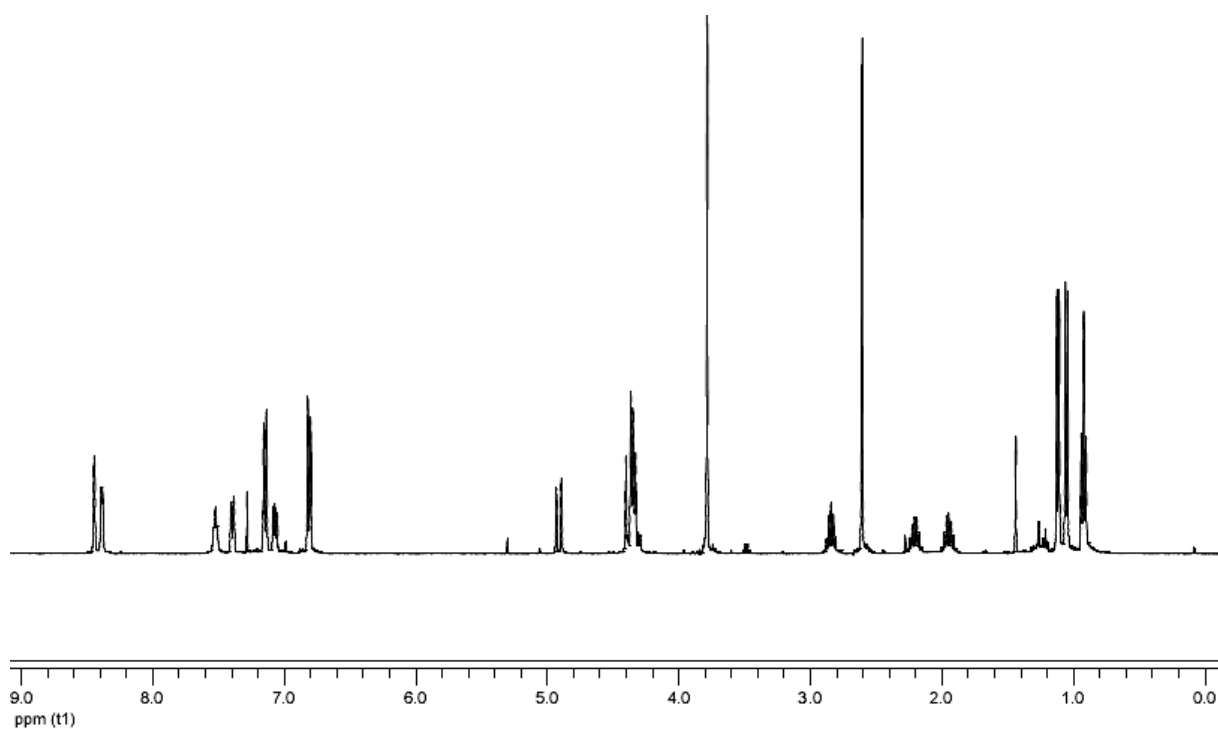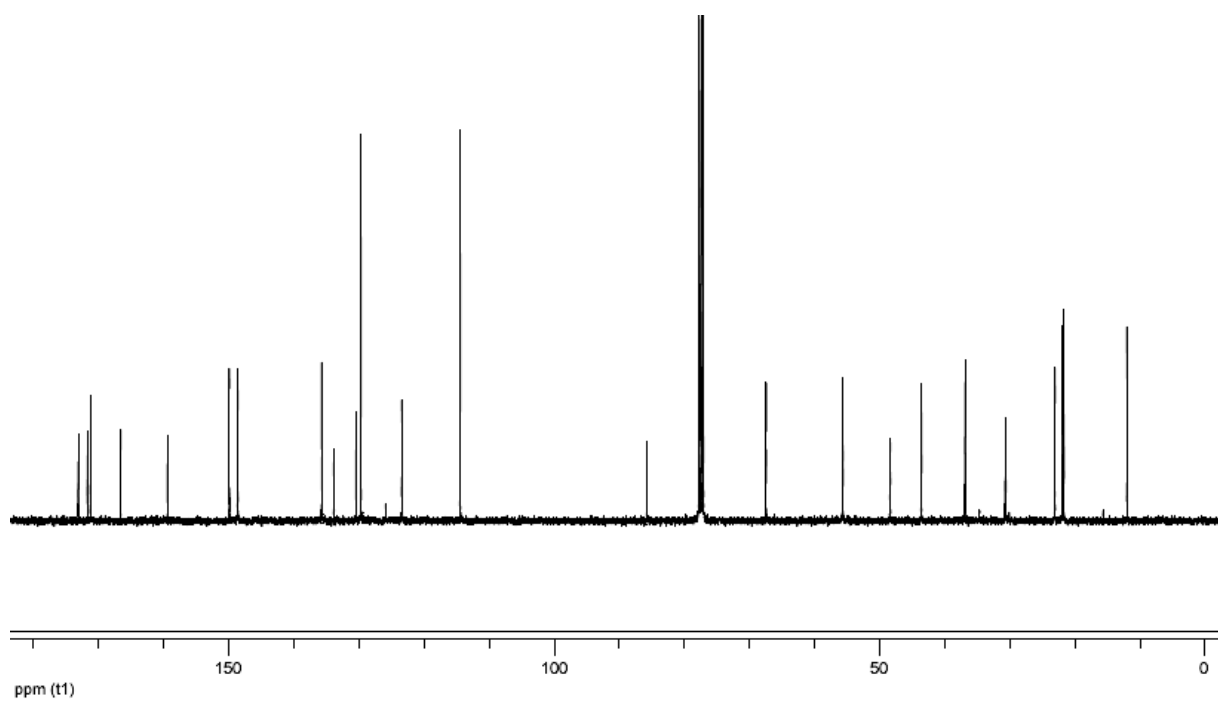



**General procedure for pyrrolo[2,3-*d*]pyrimidines:**

To a 0.2 M solution of Sonogashira adduct in DMF was added 1.2 equiv. of NaH (95 %). The resulting mixture was stirred overnight at room temperature.

Solvent was then removed by extraction and the organic phases were collected and concentrated *in vacuo* to afford pyrrolo[2,3-*d*]pyrimidines after purification by flash chromatography on silica gel.

**2-[5-benzyl-6-(4-chlorophenyl)-2-isopropyl-4-methylpyrrolo[2,3-*d*]pyrimidin-7-yl]-4-methylpentanoic acid 4-methoxybenzylamide**

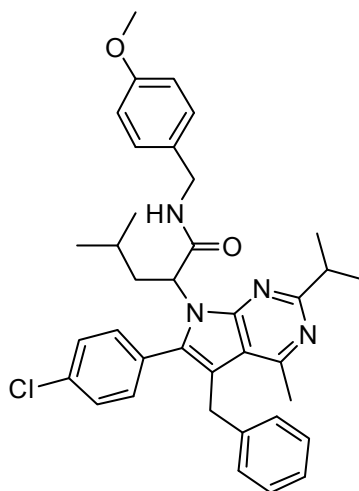

$C_{37}H_{41}ClN_4O_2$   
MW = 609.20 g.mol<sup>-1</sup>

**3b**

General procedure using **2b** (100 mg, 0.16 mmol) and NaH (5 mg, 0.20 mmol). Purification by flash chromatography (petroleum ether-diethyl ether, 70:30) gave **3b** as a yellow oil.

**Yield** 76 % (76 mg).

**R<sub>f</sub>** 0.3 (70:30 petroleum ether / diethyl ether).

**<sup>1</sup>H NMR (CDCl<sub>3</sub>, 400 MHz)** δ 8.86 (br s, 1H), 7.59-7.37 (m, 2H), 7.36-7.25 (m, 3H), 7.24-7.15 (m, 4H), 7.04 (d, *J* = 7.4 Hz, 2H), 6.86 (d, *J* = 8.5 Hz, 2H), 4.90-4.70 (br s, 1H), 4.60 (dd, *J* = 14.7, 6.1 Hz, 1H), 4.29 (dd, *J* = 14.7, 4.8 Hz, 1H), 4.19 (d, *J* = 17.1 Hz, 1H), 4.00 (d, *J* = 17.1 Hz, 1H), 3.81 (s, 3H), 3.13 (sept, *J* = 6.8 Hz, 1H), 2.98-2.75 (br s, 1H), 2.50 (s, 3H), 1.88-1.78 (m, 1H), 1.25 (d, *J* = 6.8 Hz, 3H), 1.16 (d, *J* = 6.8 Hz, 3H), 0.96-0.82 (m, 1H), 0.68 (d, *J* = 6.6 Hz, 3H), 0.60 (d, *J* = 6.6 Hz, 3H).

**<sup>13</sup>C NMR (CDCl<sub>3</sub>, 100.6 MHz)** δ 171.7, 168.2, 160.7, 159.4, 152.3, 141.4, 139.5, 135.9, 132.4, 130.6, 129.5, 129.1, 128.6, 128.0, 126.6, 116.0, 114.5, 111.2, 61.7, 55.7, 43.6, 39.4, 37.5, 31.8, 25.2, 23.4, 23.1, 22.5, 22.3, 21.6.

**I.R.** (thin film) 1671, 1566, 1513, 1421 cm<sup>-1</sup>.

**HRMS** Calculated for C<sub>37</sub>H<sub>41</sub>ClN<sub>4</sub>O<sub>2</sub> 608.2918, found 608.2931.

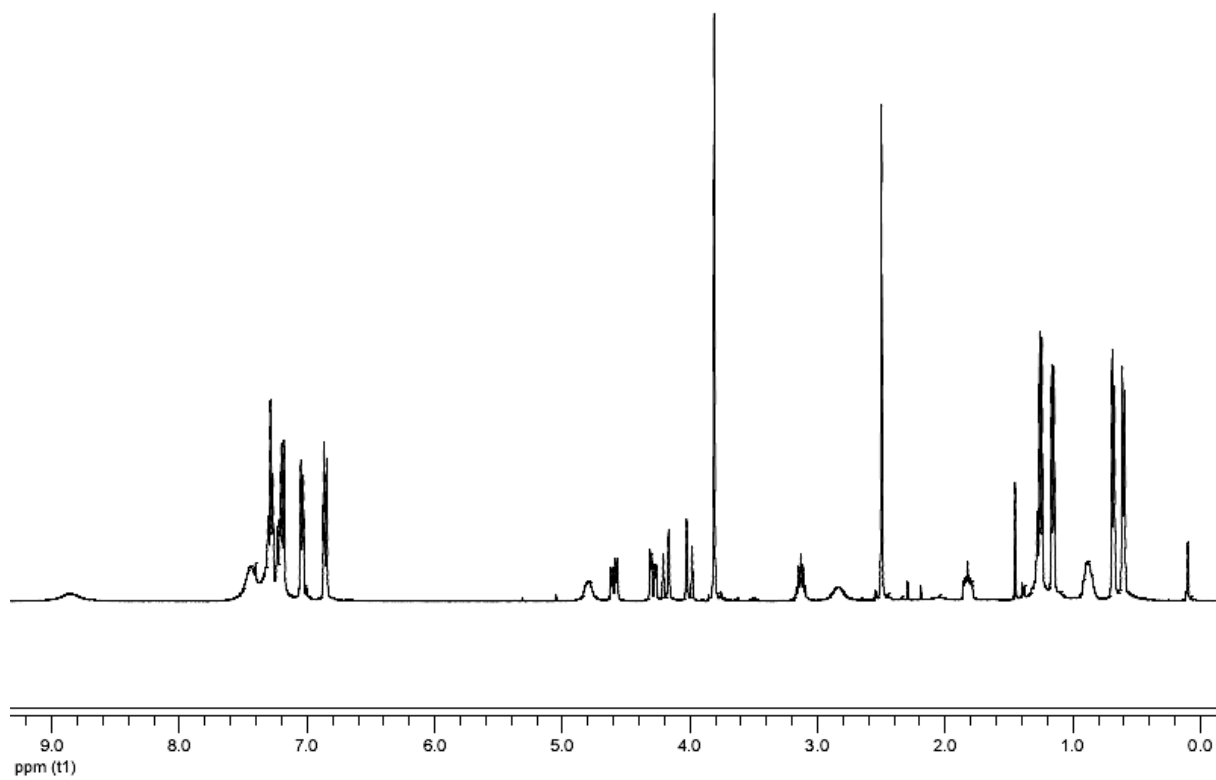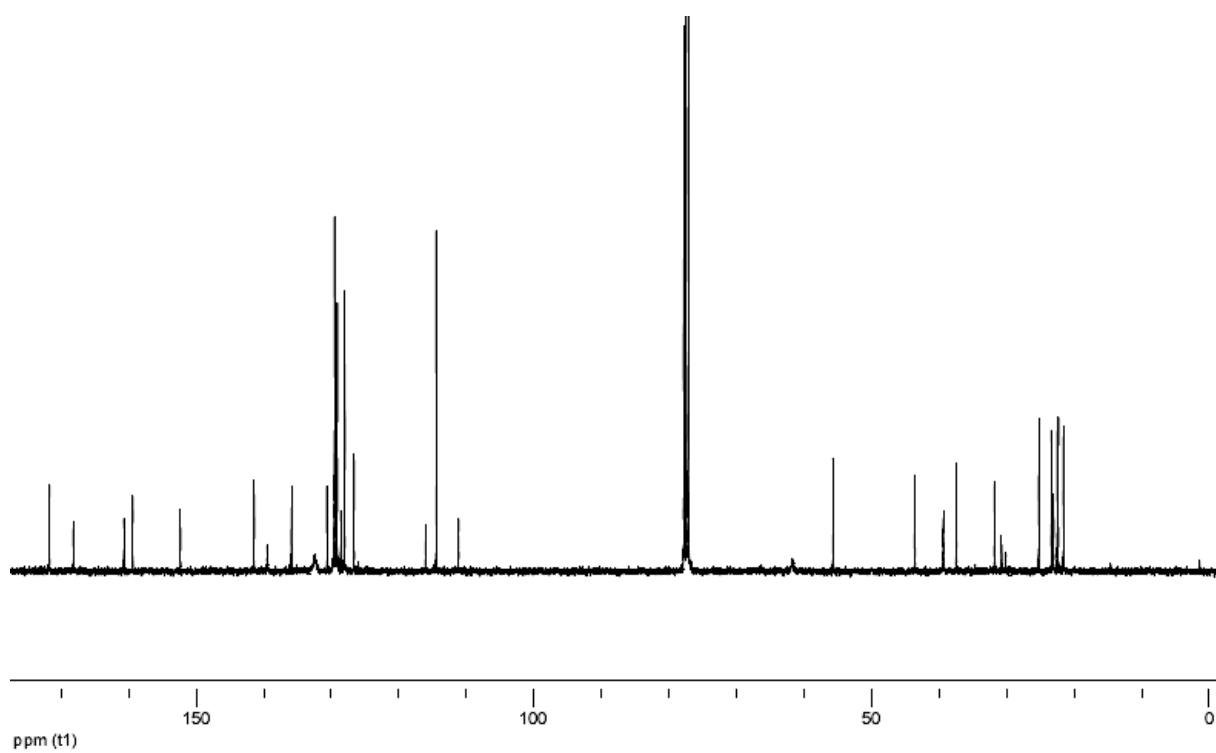

**2-[6-(4-chlorophenyl)-2-isopropyl-4-methyl-5-(4-methylbenzyl)-pyrrolo[2,3-*d*]pyrimidin-7-yl]-4-methylpentanoic acid 4-chlorobenzylamide**

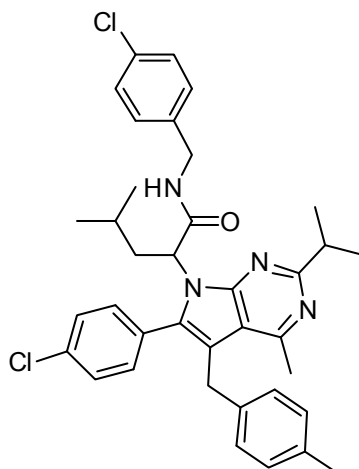

$C_{37}H_{40}Cl_2N_4O$   
MW = 627.65 g.mol<sup>-1</sup>

**3c**

General procedure using **2c** (300 mg, 0.48 mmol) and NaH (14 mg, 0.58 mmol). Purification by flash chromatography (petroleum ether-diethyl ether, 70:30) gave **3c** as a yellow oil.

**Yield** 68 % (205 mg).

**R<sub>f</sub>** 0.3 (70:30 petroleum ether / diethyl ether).

**<sup>1</sup>H NMR (CDCl<sub>3</sub>, 400 MHz)** δ 9.20 (br s, 1H), 7.59-7.23 (m, 6H), 7.20 (d, *J* = 8.4 Hz, 2H), 7.10 (d, *J* = 7.9 Hz, 2H), 6.92 (d, *J* = 7.9 Hz, 2H), 4.78 (br s, 1H), 4.64 (dd, *J* = 15.0, 6.4 Hz, 1H), 4.30 (dd, *J* = 15.0, 5.1 Hz, 1H), 4.15 (d, *J* = 17.0 Hz, 1H), 3.96 (d, *J* = 17.0 Hz, 1H), 3.14 (sept, *J* = 6.9 Hz, 1H), 2.83 (br s, 1H), 2.52 (s, 3H), 2.34 (s, 3H), 1.85-1.76 (m, 1H), 1.26 (d, *J* = 6.9 Hz, 3H), 1.16 (d, *J* = 6.9 Hz, 3H), 0.92-0.80 (m, 1H), 0.68 (d, *J* = 6.6 Hz, 3H), 0.59 (d, *J* = 6.6 Hz, 3H).

**<sup>13</sup>C NMR (CDCl<sub>3</sub>, 100.6 MHz)** δ 172.0, 168.1, 161.0, 152.3, 139.4, 138.3, 137.2, 136.2, 135.9, 133.6, 129.8, 129.5, 129.2, 127.9, 128.5, 116.2, 111.5, 61.8, 43.3, 39.4, 37.4, 31.3, 25.2, 23.3, 23.2, 22.5, 22.4, 21.6, 21.4.

**I.R.** (thin film) 1671, 1564, 1490, 1422 cm<sup>-1</sup>.

**HRMS** Calculated for C<sub>37</sub>H<sub>40</sub>Cl<sub>2</sub>N<sub>4</sub>O 626.2579, found 626.2591.

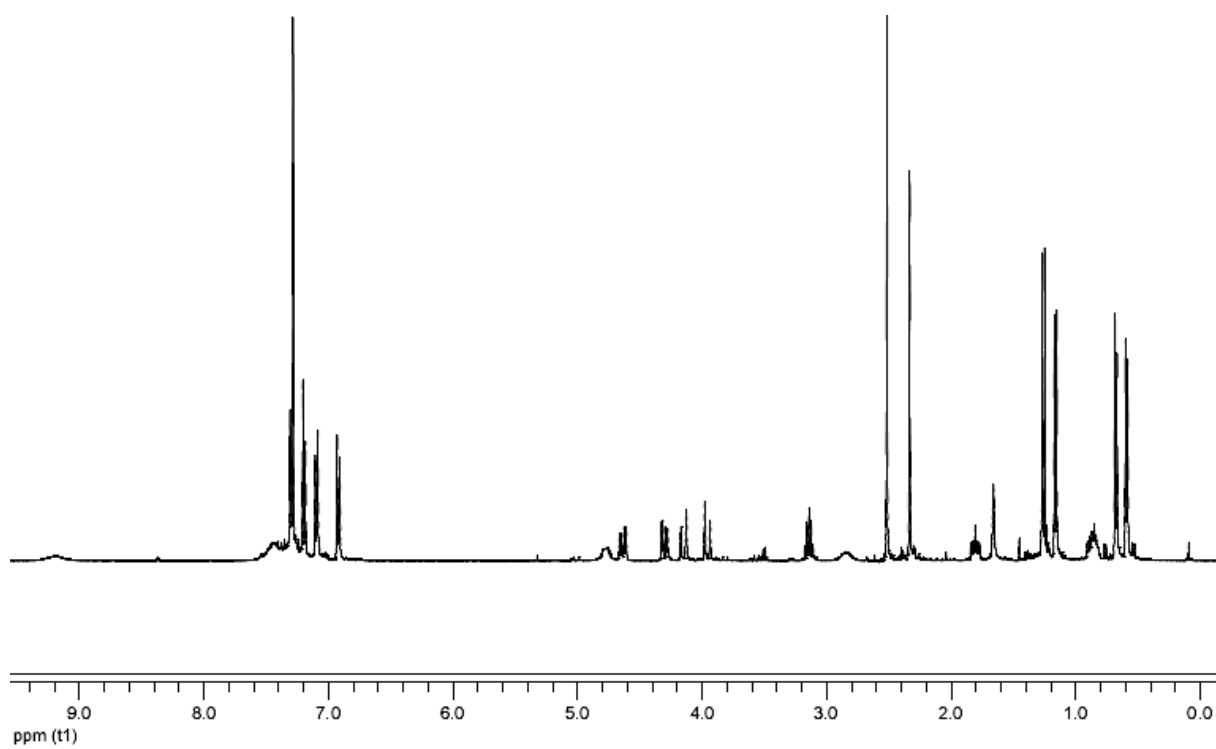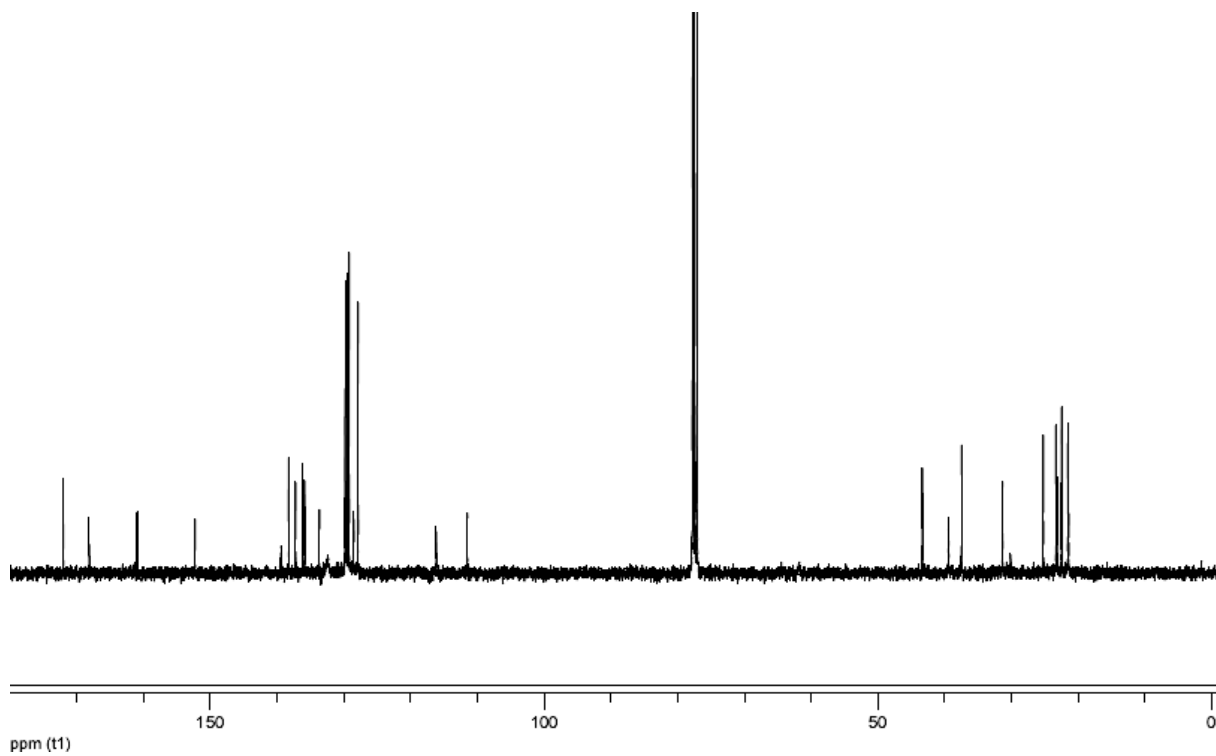

**2-[5-benzyl-6-(4-chlorophenyl)-2-isopropyl-4-methylpyrrolo[2,3-*d*]pyrimidin-7-yl]-4-methylpentanoic acid cyclohexylamide**

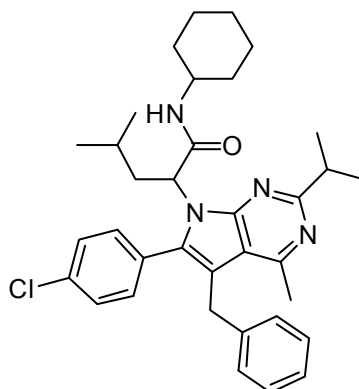

$C_{35}H_{43}ClN_4O$   
MW = 571.19 g.mol<sup>-1</sup>

**3d**

General procedure using **2d** (140 mg, 0.25 mmol) and NaH (7 mg, 0.29 mmol). Purification by flash chromatography (cyclohexane-diethyl ether, 90:10) gave **3d** as a yellow oil.

**Yield** 57 % (80 mg).

**R<sub>f</sub>** 0.3 (90:10 cyclohexane / diethyl ether).

**<sup>1</sup>H NMR (CDCl<sub>3</sub>, 400 MHz)** δ 8.28-7.94 (br s, 1H), 7.53-7.10 (m, 7H), 7.02 (d, *J* = 7.2 Hz, 2H), 4.67 (br s, 1H), 4.17 (d, *J* = 17.2 Hz, 1H), 3.97 (d, *J* = 17.2 Hz, 1H), 3.86-3.74 (m, 1H), 3.26 (sept, *J* = 6.9 Hz, 1H), 2.86 (br s, 1H), 2.49 (s, 3H), 2.06-1.97 (m, 1H), 1.86-1.57 (m, 4H), 1.41 (d, *J* = 6.9 Hz, 3H), 1.39 (d, *J* = 6.9 Hz, 3H), 1.37-0.74 (m, 7H), 0.66 (d, *J* = 6.5 Hz, 3H), 0.57 (d, *J* = 6.5 Hz, 3H).

**<sup>13</sup>C NMR (CDCl<sub>3</sub>, 100.6 MHz)** δ 170.6, 167.8, 160.2, 152.0, 141.1, 140.3, 135.4, 130.8, 128.9, 128.5, 127.9, 127.6, 126.2, 115.6, 110.6, 61.4, 48.5, 38.7, 37.3, 33.1, 33.0, 31.4, 25.5, 25.5, 25.0, 24.8, 23.0, 22.7, 22.6, 22.0, 21.0.

**I.R.** (thin film) 1668, 1563, 1452, 1420 cm<sup>-1</sup>.

**HRMS** Calculated for C<sub>35</sub>H<sub>43</sub>ClN<sub>4</sub>O 570.3125, found 570.3125.

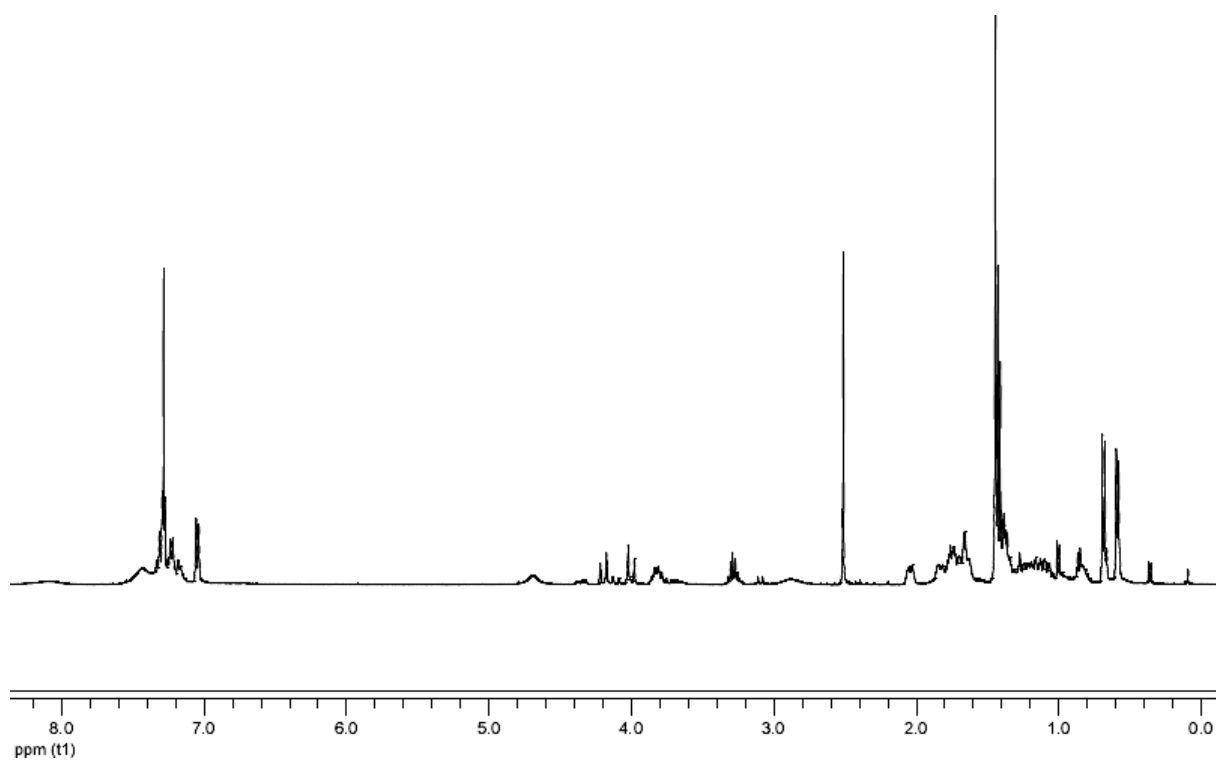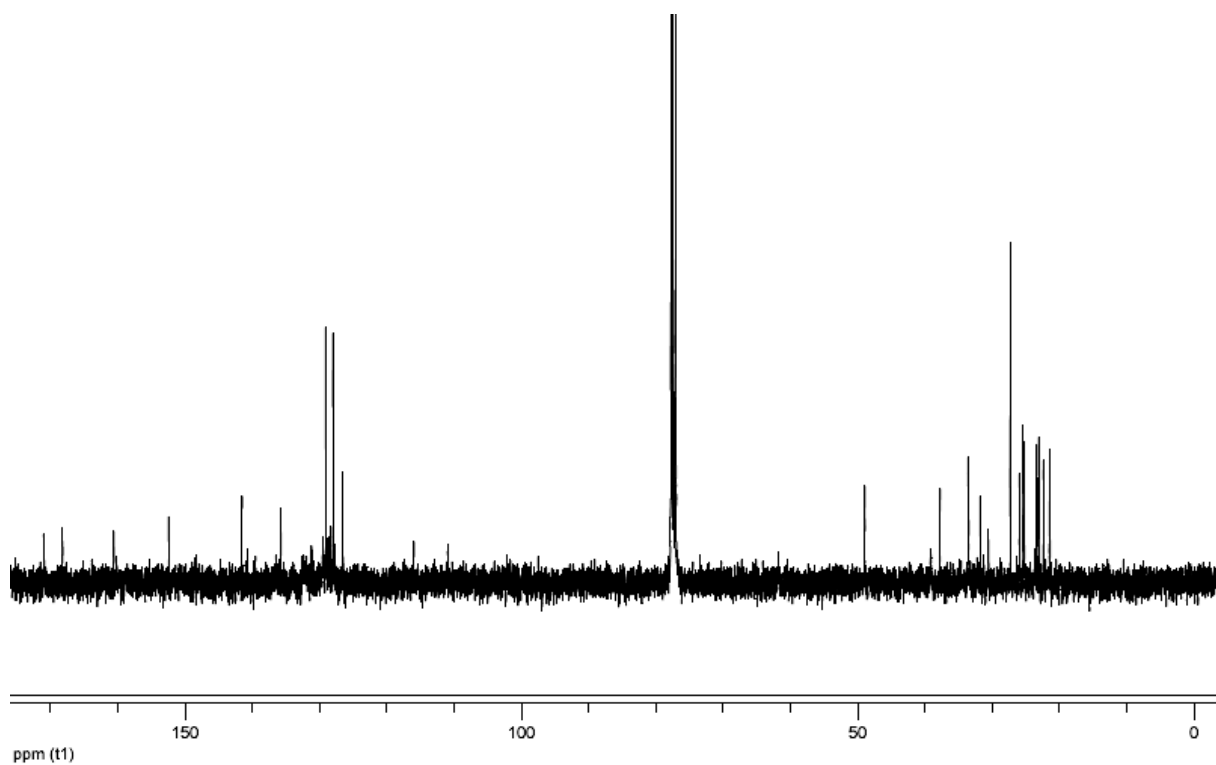

**2-[5-benzyl-6-(4-chlorophenyl)-4-methyl-2-phenylpyrrolo[2,3-*d*]pyrimidin-7-yl]-4-methylpentanoic acid 4-methoxybenzylamide**

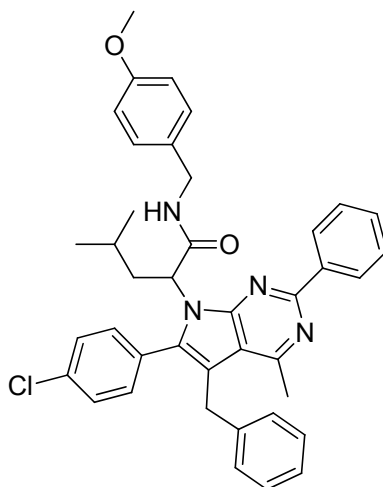

$C_{40}H_{39}ClN_4O_2$   
MW = 643.22 g.mol<sup>-1</sup>

**3e**

General procedure using **2e** (160 mg, 0.26 mmol) and NaH (8 mg, 0.31 mmol). Purification by flash chromatography (petroleum ether-diethyl ether, 70:30) gave **3e** as a yellow oil.

**Yield** 63 % (100 mg).

**R<sub>f</sub>** 0.3 (70:30 petroleum ether / diethyl ether).

**<sup>1</sup>H NMR (CDCl<sub>3</sub>, 400 MHz)** δ 8.31 (d, *J* = 7.1 Hz, 2H), 7.56-7.20 (m, 11H), 7.13 (d, *J* = 8.6 Hz, 2H), 7.06 (d, *J* = 7.1 Hz, 2H), 6.66 (d, *J* = 8.6 Hz, 2H), 4.98-4.79 (br s, 1H), 4.67 (dd, *J* = 14.5, 6.5 Hz, 1H), 4.27-4.17 (m, 2H), 4.05 (d, *J* = 17.2 Hz, 1H), 3.73 (s, 3H), 3.06-2.85 (br s, 1H), 2.59 (s, 3H), 2.00-1.89 (m, 1H), 1.06-0.94 (m, 1H), 0.70 (d, *J* = 6.6 Hz, 3H), 0.63 (d, *J* = 6.6 Hz, 3H).

**<sup>13</sup>C NMR (CDCl<sub>3</sub>, 100.6 MHz)** δ 171.5, 161.0, 159.2, 157.6, 152.4, 141.4, 140.1, 138.5, 136.0, 132.4, 130.2, 129.6, 129.4, 129.2, 128.9, 128.5, 128.1, 128.0, 126.7, 116.8, 114.4, 111.6, 61.3, 55.6, 43.7, 39.4, 31.8, 25.4, 23.4, 21.7.

**I.R.** (thin film) 1668, 1564, 1513, 1416 cm<sup>-1</sup>.

**HRMS** Calculated for C<sub>40</sub>H<sub>39</sub>ClN<sub>4</sub>O<sub>2</sub> 642.2762, found 642.2781.



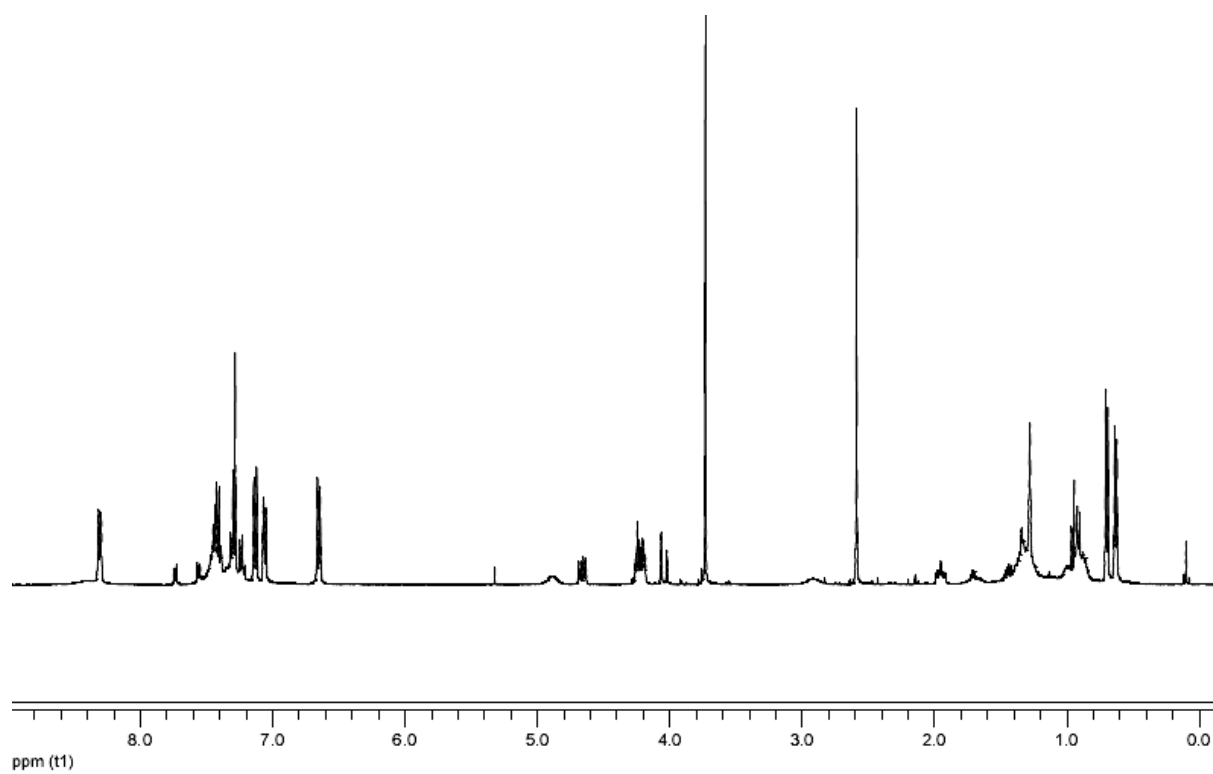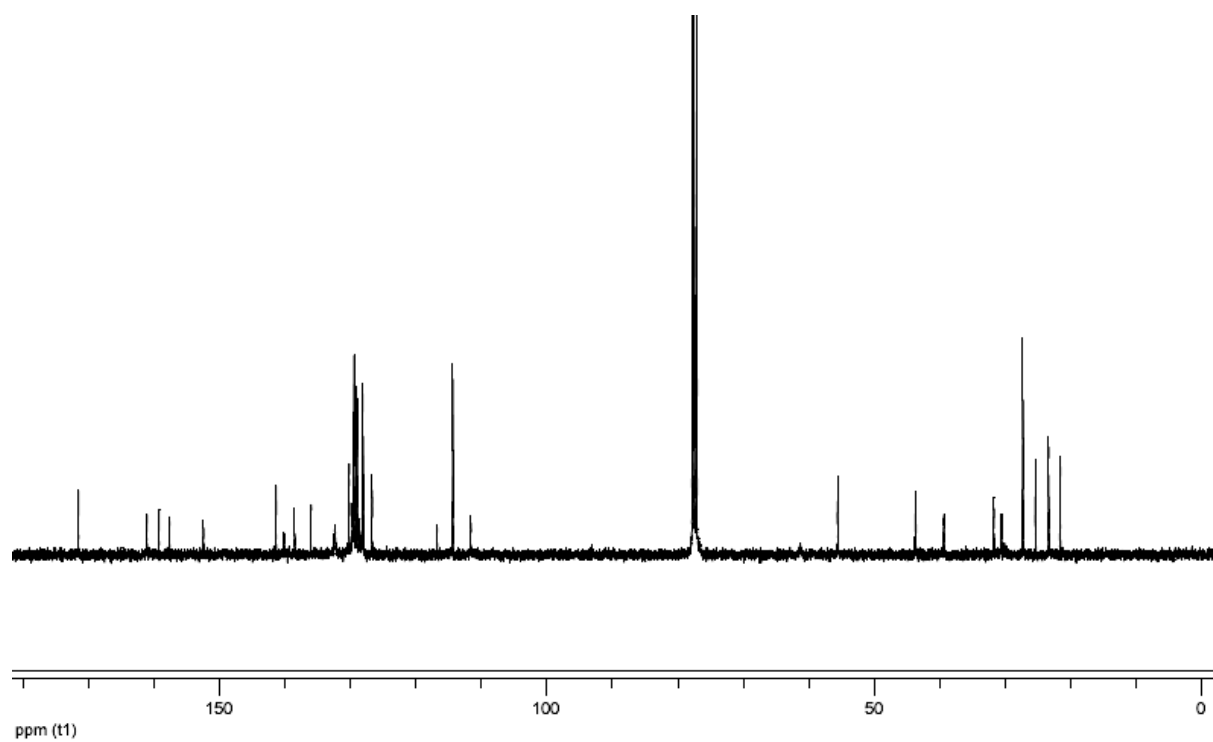

**2-[5-benzyl-6-(4-chlorophenyl)-2-isopropyl-4-methylpyrrolo[2,3-*d*]pyrimidin-7-yl]-*N*-(4-methoxybenzyl)-propionamide**

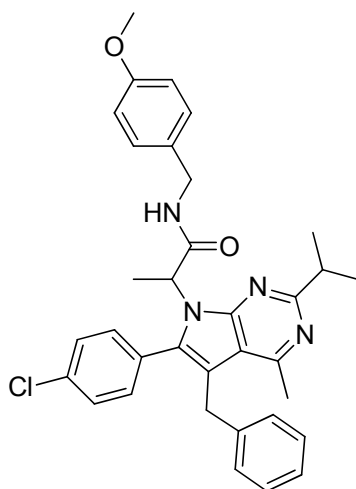

$C_{34}H_{35}ClN_4O_2$   
MW = 567.12 g.mol<sup>-1</sup>

**3f**

General procedure using **2f** (200 mg, 0.35 mmol) and NaH (10 mg, 0.42 mmol). Purification by flash chromatography (petroleum ether-diethyl ether, 70:30) gave **3f** as a yellow oil.

**Yield** 65 % (130 mg).

**R<sub>f</sub>** 0.3 (70:30 petroleum ether / diethyl ether).

**<sup>1</sup>H NMR (CDCl<sub>3</sub>, 400 MHz)** δ 8.42 (t, *J* = 5.3 Hz, 1H), 7.44 (d, *J* = 7.9 Hz, 2H), 7.36-7.19 (m, 5H), 7.16 (d, *J* = 8.6 Hz, 2H), 7.05 (d, *J* = 7.2 Hz, 2H), 6.85 (d, *J* = 8.6 Hz, 2H), 4.93 (q, *J* = 7.4 Hz, 1H), 4.55 (dd, *J* = 14.6, 6.0 Hz, 1H), 4.30 (dd, *J* = 14.6, 5.0 Hz, 1H), 4.13 (d, *J* = 17.1 Hz, 1H), 4.02 (d, *J* = 17.1 Hz, 1H), 3.81 (s, 3H), 3.13 (sept, *J* = 6.9 Hz, 1H), 2.49 (s, 3H), 1.83 (d, *J* = 7.4 Hz, 3H), 1.27 (d, *J* = 6.9 Hz, 3H), 1.20 (d, *J* = 6.9 Hz, 3H).

**<sup>13</sup>C NMR (CDCl<sub>3</sub>, 100.6 MHz)** δ 171.6, 168.3, 160.6, 159.4, 152.2, 141.4, 138.4, 135.9, 132.4, 130.5, 129.6, 129.5, 129.1, 128.7, 128.1, 126.6, 116.1, 114.4, 111.4, 57.8, 55.7, 43.6, 37.5, 31.8, 23.1, 22.5, 22.4, 17.4.

**I.R.** (thin film) 1667, 1564, 1513, 1421 cm<sup>-1</sup>.

**HRMS** Calculated for C<sub>34</sub>H<sub>35</sub>ClN<sub>4</sub>O<sub>2</sub> 566.2449, found 566.2459.

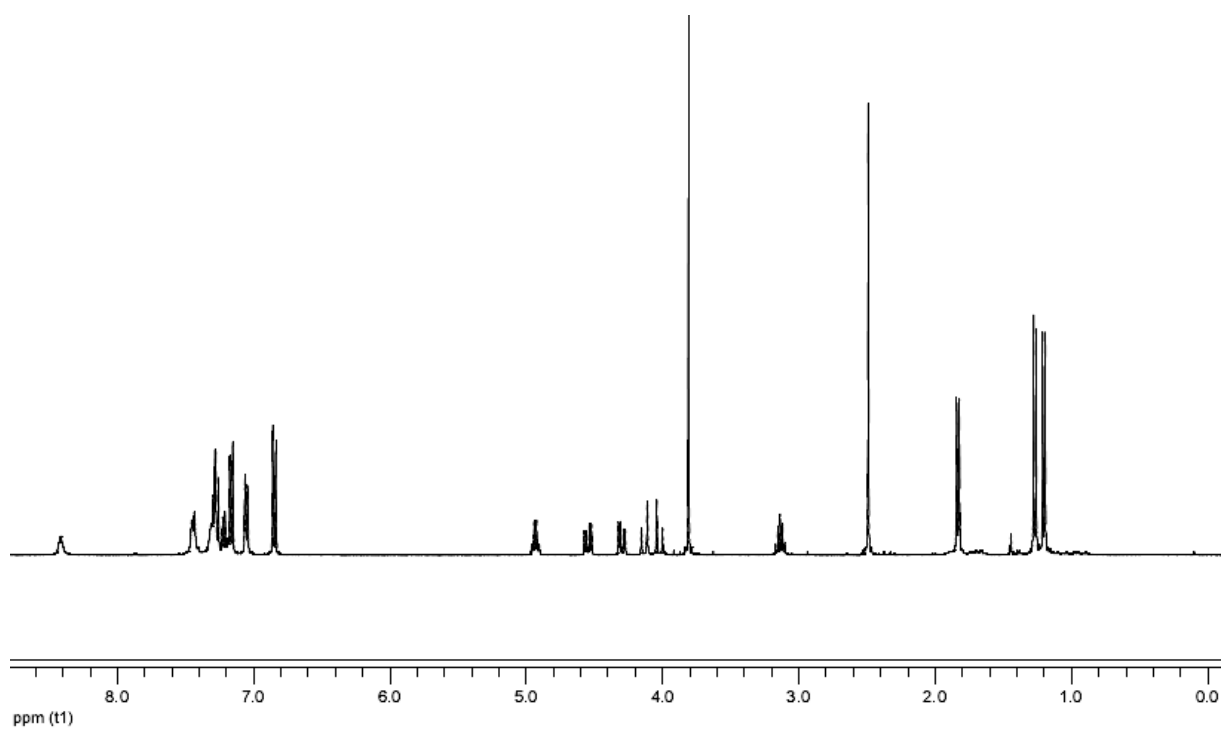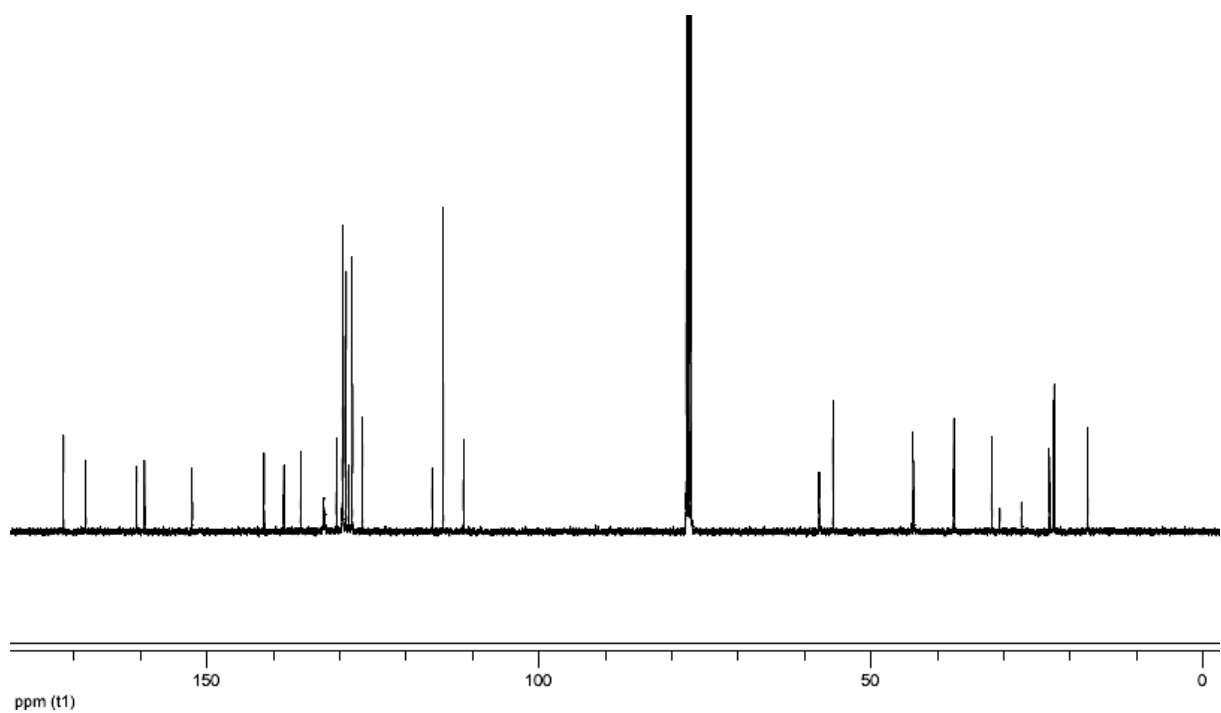

**2-[5-benzyl-6-(4-chlorophenyl)-2-isopropyl-4-methylpyrrolo[2,3-*d*]pyrimidin-7-yl]-*N*-(4-methoxybenzyl)-4-phenylbutyramide**

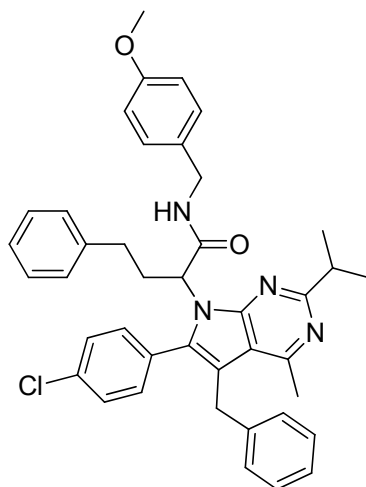

$C_{41}H_{41}ClN_4O_2$   
MW = 657.24 g.mol<sup>-1</sup>

**3g**

General procedure using **2g** (330 mg, 0.50 mmol) and NaH (14 mg, 0.60 mmol). Purification by flash chromatography (petroleum ether-diethyl ether, 70:30) gave **3g** as a yellow oil.

**Yield** 62 % (205 mg).

**R<sub>f</sub>** 0.3 (70:30 petroleum ether / diethyl ether).

**<sup>1</sup>H NMR (CDCl<sub>3</sub>, 400 MHz)** δ 8.94 (br s, 1H), 7.57-7.32 (m, 2H), 7.25-7.11 (m, 6H), 7.05 (d, *J* = 7.2 Hz, 2H), 6.90 (d, *J* = 7.6 Hz, 2H), 6.85 (d, *J* = 8.6 Hz, 2H), 4.82-4.71 (m, 1H), 4.60 (dd, *J* = 14.6, 6.2 Hz, 1H), 4.27 (dd, *J* = 14.6, 4.8 Hz, 1H), 4.18 (d, *J* = 17.1 Hz, 1H), 4.00 (d, *J* = 17.1 Hz, 1H), 3.81 (s, 3H), 3.14 (sept, *J* = 6.9 Hz, 1H), 3.08-2.95 (m, 1H), 2.58-2.52 (m, 1H), 2.51 (s, 3H), 2.33-2.23 (m, 1H), 2.14-2.05 (m, 1H), 1.26 (d, *J* = 6.9 Hz, 3H), 1.17 (d, *J* = 6.9 Hz, 3H).

**<sup>13</sup>C NMR (CDCl<sub>3</sub>, 100.6 MHz)** δ 171.2, 168.3, 160.9, 159.4, 152.2, 141.4, 140.5, 139.5, 135.8, 132.4, 130.6, 129.5, 129.1, 128.8, 128.6, 128.1, 126.7, 126.5, 116.1, 114.5, 111.2, 62.8, 55.7, 43.6, 37.5, 32.6, 32.6, 31.8, 23.2, 22.5, 22.4.

**I.R.** (thin film) 1669, 1567, 1513, 1425 cm<sup>-1</sup>.

**HRMS** Calculated for C<sub>41</sub>H<sub>41</sub>ClN<sub>4</sub>O<sub>2</sub> 656.2918, found 656.2910.

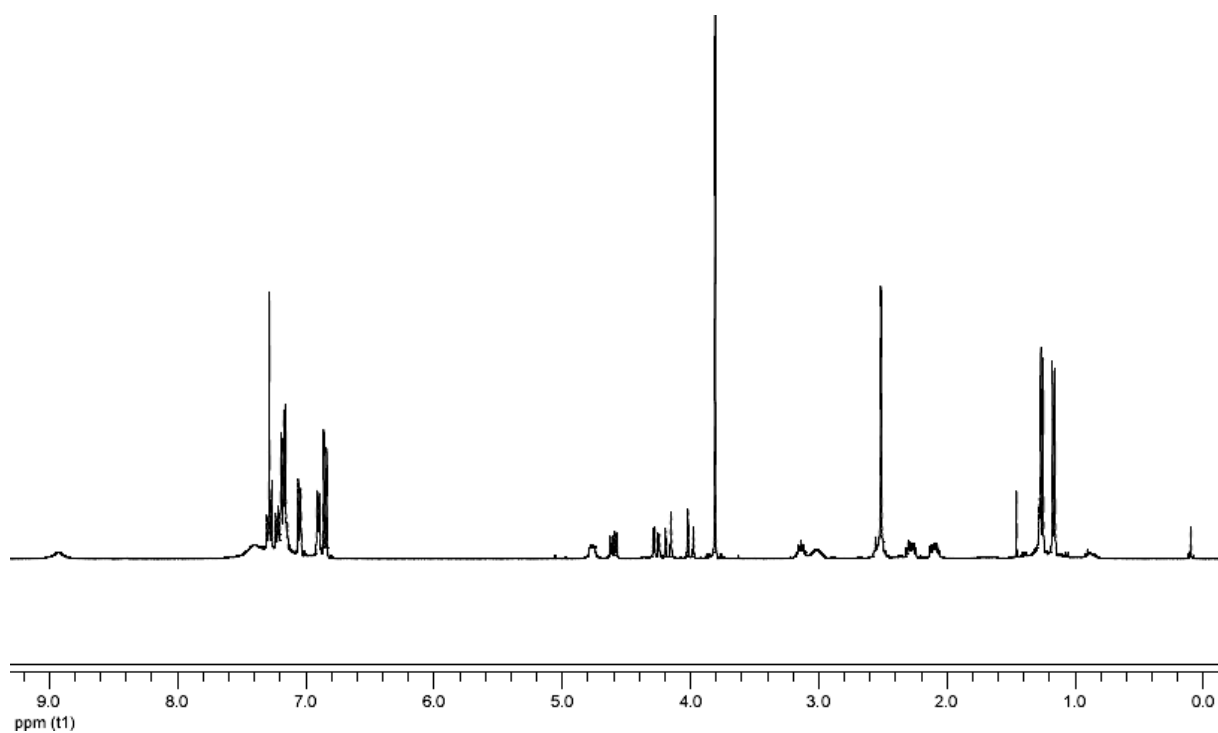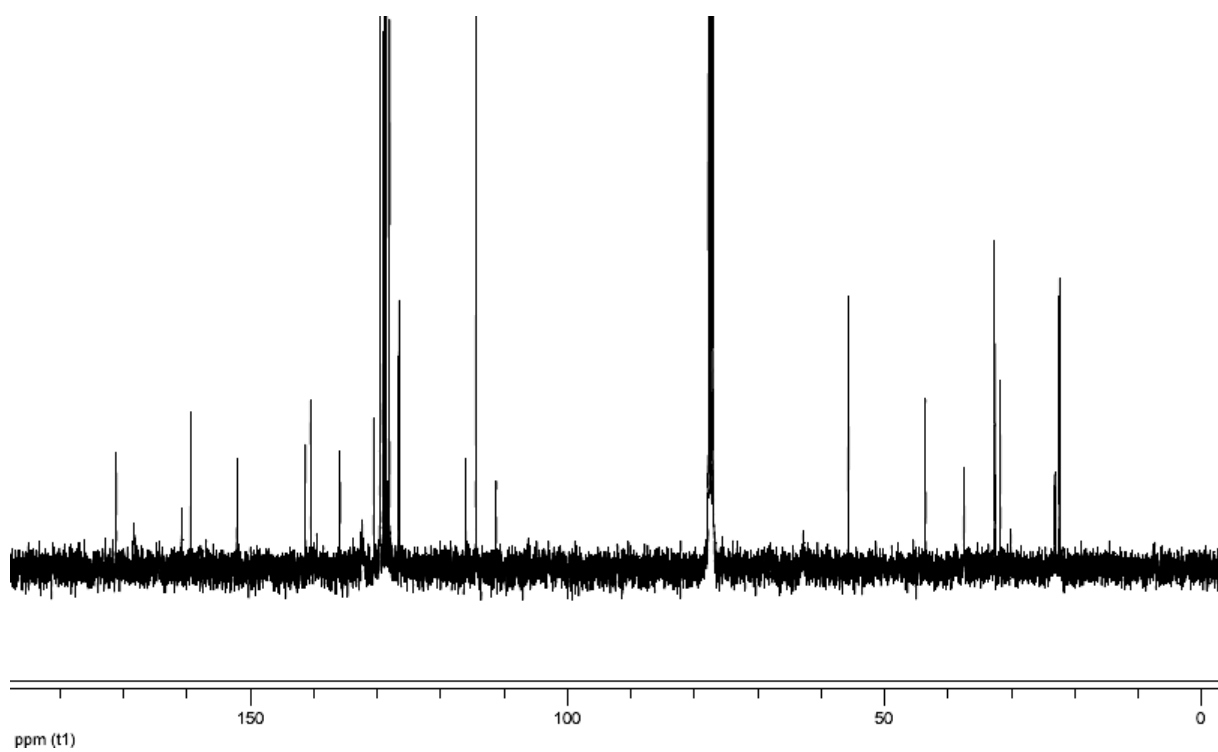

**2-[5-benzyl-6-(4-chlorophenyl)-2-isopropyl-4-methylpyrrolo[2,3-d]pyrimidin-7-yl]-N-(4-methoxybenzyl)-3-methylbutyramide**

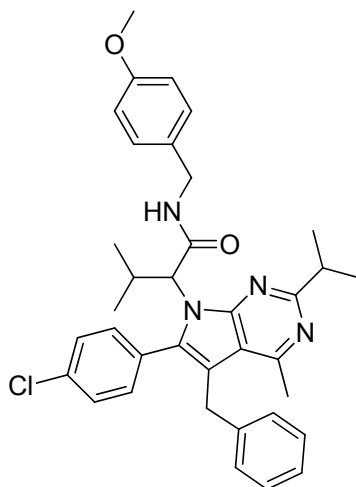

$C_{36}H_{39}ClN_4O_2$   
MW = 595.17 g.mol<sup>-1</sup>

**3h**

General procedure using **2h** (300 mg, 0.50 mmol) and NaH (14 mg, 0.60 mmol). Purification by flash chromatography (petroleum ether-diethyl ether, 70:30) gave **3h** as a yellow oil.

**Yield** 55 % (165 mg).

**R<sub>f</sub>** 0.3 (70:30 petroleum ether / diethyl ether).

**<sup>1</sup>H NMR (CDCl<sub>3</sub>, 400 MHz)** δ 9.93 (br s, 1H), 7.64-7.32 (m, 3H), 7.32-7.25 (m, 2H), 7.25-7.18 (m, 4H), 7.06 (d, *J* = 7.3 Hz, 2H), 6.86 (d, *J* = 8.6 Hz, 2H), 4.68 (dd, *J* = 14.5, 6.4 Hz, 1H), 4.25-4.13 (m, 3H), 3.99 (d, *J* = 17.2 Hz, 1H), 3.81 (s, 3H), 3.30-3.17 (m, 1H), 3.10 (sept, *J* = 6.9 Hz, 1H), 2.50 (s, 3H), 1.22 (d, *J* = 6.9 Hz, 3H), 1.16 (d, *J* = 6.9 Hz, 3H), 1.00 (d, *J* = 6.6 Hz, 3H), 0.38 (d, *J* = 6.6 Hz, 3H).

**<sup>13</sup>C NMR (CDCl<sub>3</sub>, 100.6 MHz)** δ 170.8, 167.7, 160.9, 159.3, 151.9, 141.5, 140.2, 135.8, 130.9, 129.6, 129.1, 128.6, 128.0, 126.6, 116.1, 114.4, 110.7, 71.1, 55.7, 43.5, 37.4, 31.8, 29.6, 23.2, 22.5, 22.3, 19.7, 19.6.

**I.R.** (thin film) 1672, 1565, 1513, 1421 cm<sup>-1</sup>.

**HRMS** Calculated for C<sub>36</sub>H<sub>39</sub>ClN<sub>4</sub>O<sub>2</sub> 594.2761, found 594.2730.

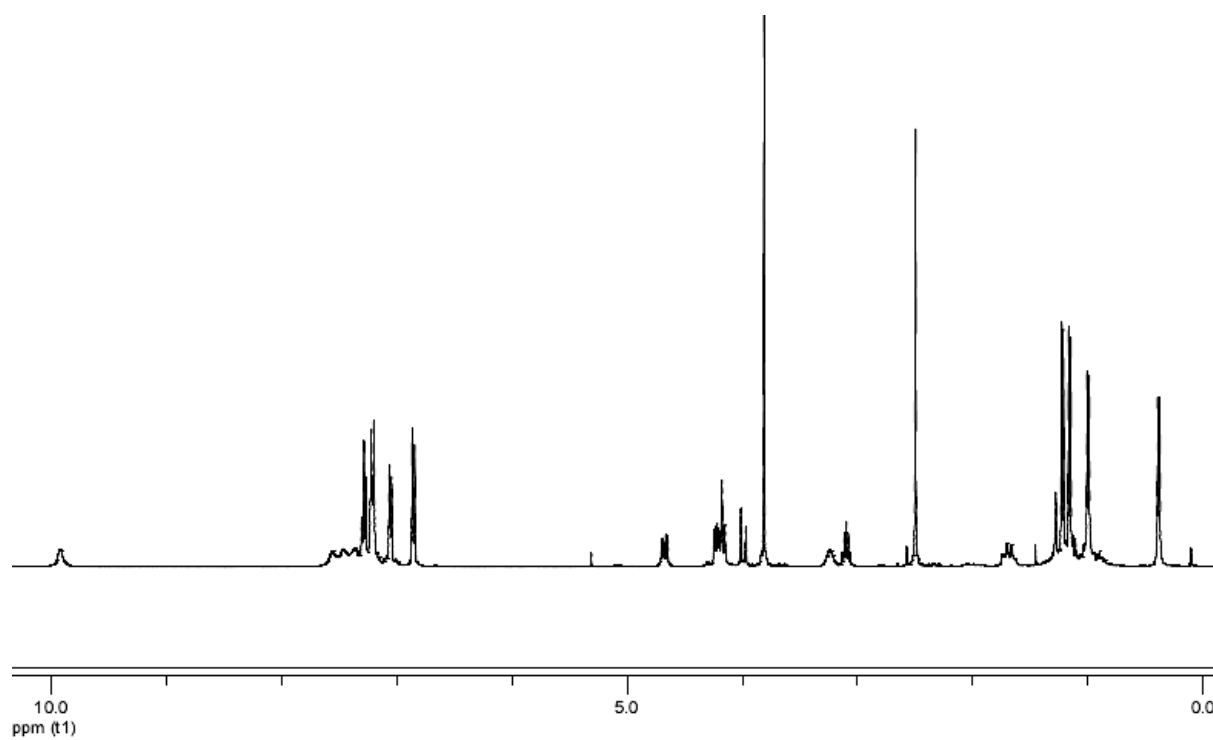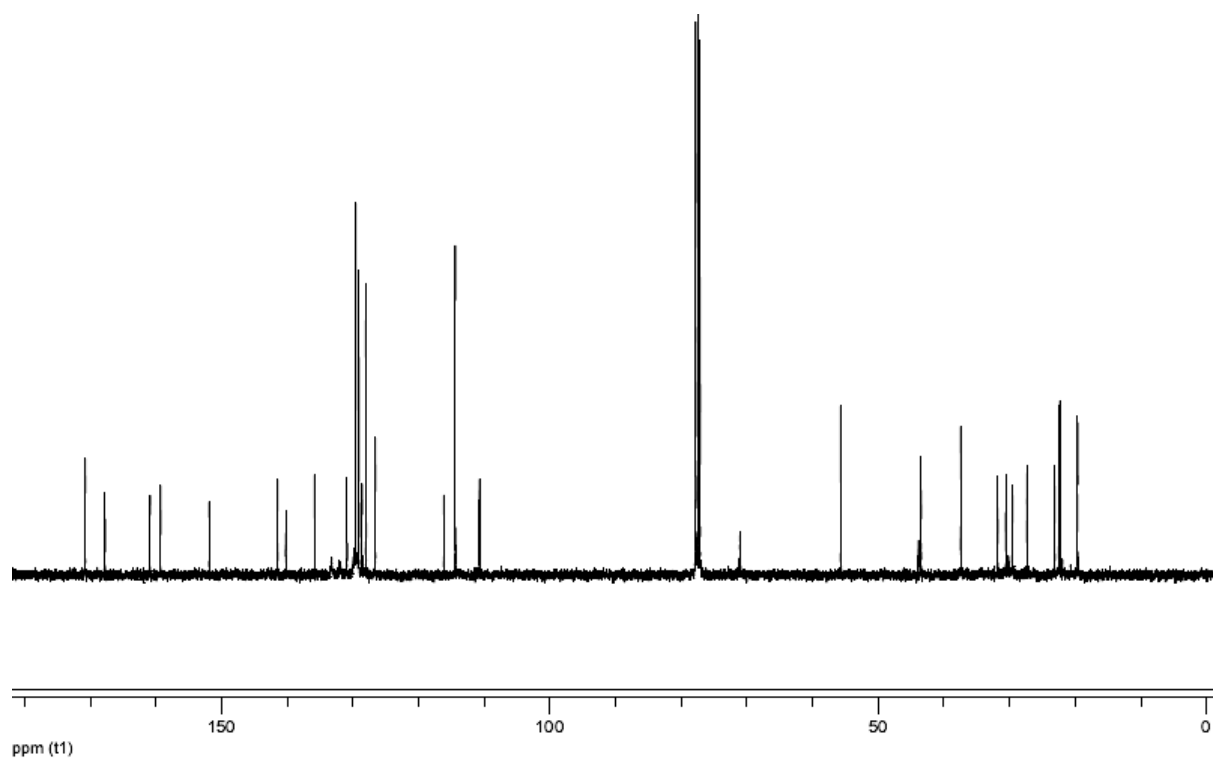

**2-[5-(4-fluorobenzyl)-2-isopropyl-4-methyl-6-phenylpyrrolo[2,3-*d*]pyrimidin-7-yl]-*N*-(4-methoxybenzyl)-4-phenylbutyramide**

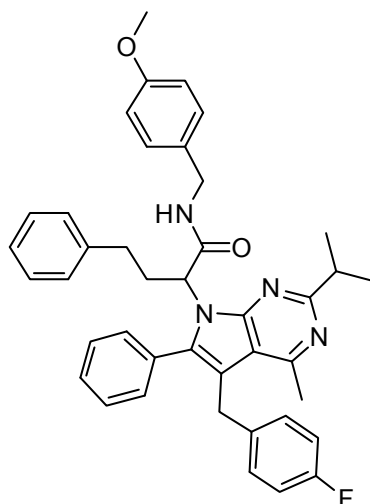

$C_{41}H_{41}FN_4O_2$   
MW = 640.79 g.mol<sup>-1</sup>

**3i**

General procedure using **2i** (260 mg, 0.41 mmol) and NaH (12 mg, 0.49 mmol). Purification by flash chromatography (petroleum ether-diethyl ether, 60:40) gave **3i** as a yellow oil.

**Yield** 51 % (132 mg).

**R<sub>f</sub>** 0.3 (60:40 petroleum ether / diethyl ether).

**<sup>1</sup>H NMR (CDCl<sub>3</sub>, 400 MHz)** δ 8.86 (br s, 1H), 7.67-7.28 (m, 4H), 7.26-7.07 (m, 6H), 7.02 (dd,  $J_{H-H}$ ,  $J_{H-F}$  = 8.8, 5.5 Hz, 2H), 6.96 (t,  $J_{H-H}$  =  $J_{H-F}$  = 8.8 Hz, 2H), 6.90 (d,  $J$  = 8.0 Hz, 2H), 6.85 (d,  $J$  = 8.6 Hz, 2H), 4.83 (dd,  $J$  = 10.4, 5.0 Hz, 1H), 4.61 (dd,  $J$  = 14.6, 6.3 Hz, 1H), 4.27 (dd,  $J$  = 14.6, 4.8 Hz, 1H), 4.15 (d,  $J$  = 17.0 Hz, 1H), 4.00 (d,  $J$  = 17.0 Hz, 1H), 3.81 (s, 3H), 3.15 (sept,  $J$  = 6.9 Hz, 1H), 3.11-2.99 (m, 1H), 2.52 (s, 3H), 2.51-2.45 (m, 1H), 2.34-2.24 (m, 1H), 2.10-2.00 (m, 1H), 1.27 (d,  $J$  = 6.9 Hz, 3H), 1.19 (d,  $J$  = 6.9 Hz, 3H).

**<sup>13</sup>C NMR (CDCl<sub>3</sub>, 100.6 MHz)** δ 171.3, 168.2, 161.7 (d,  $J_{C-F}$  = 243.0 Hz), 160.5, 159.4, 152.1, 141.0, 140.7, 137.3 (d,  $J_{C-F}$  = 3.0 Hz), 130.6, 129.9, 129.7, 129.5, 129.4 (d,  $J_{C-F}$  = 8.0 Hz), 128.8, 128.6, 126.5, 116.0, 115.8 (d,  $J_{C-F}$  = 21.2 Hz), 114.5, 110.7, 63.0, 55.7, 43.6, 37.5, 32.8, 32.7, 31.1, 23.2, 22.5, 22.4.

**I.R.** (thin film) 1668, 1571, 1508, 1422 cm<sup>-1</sup>.

**HRMS** Calculated for C<sub>41</sub>H<sub>41</sub>FN<sub>4</sub>O<sub>2</sub> 640.3214, found 640.3216.



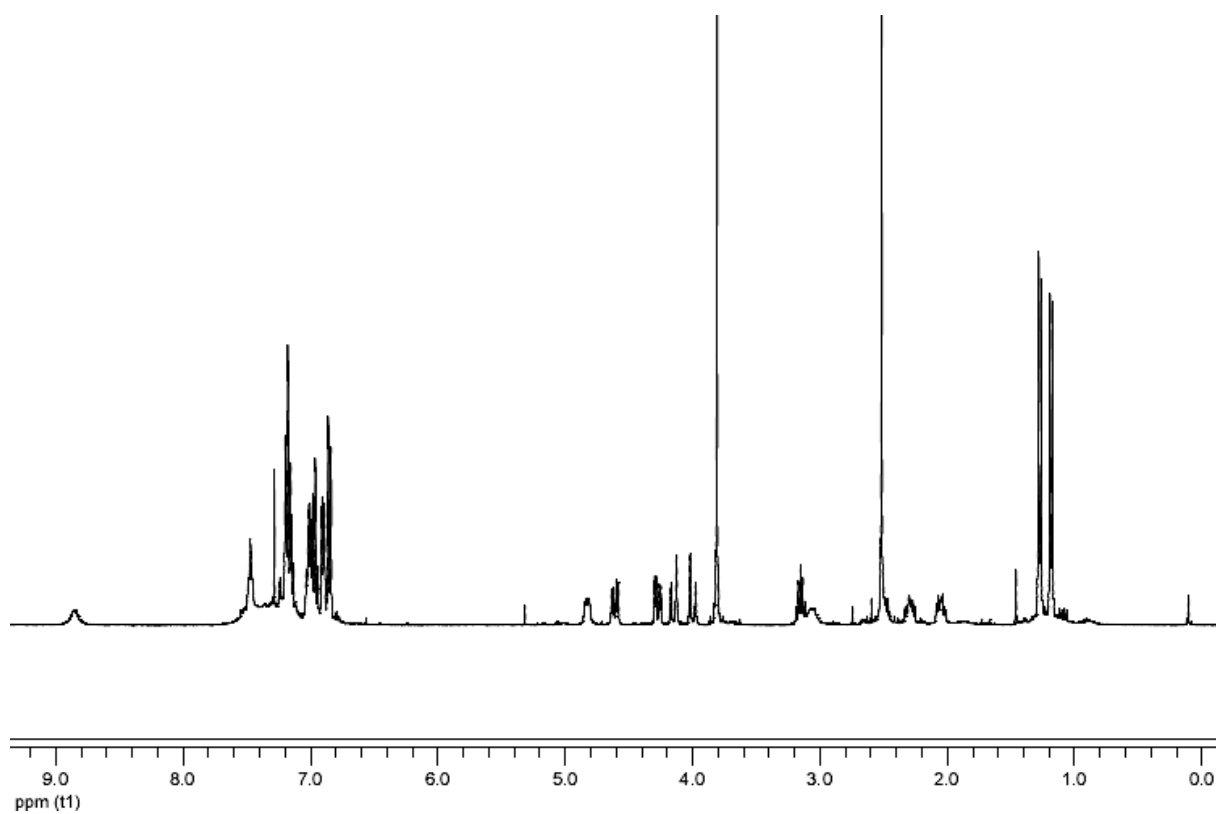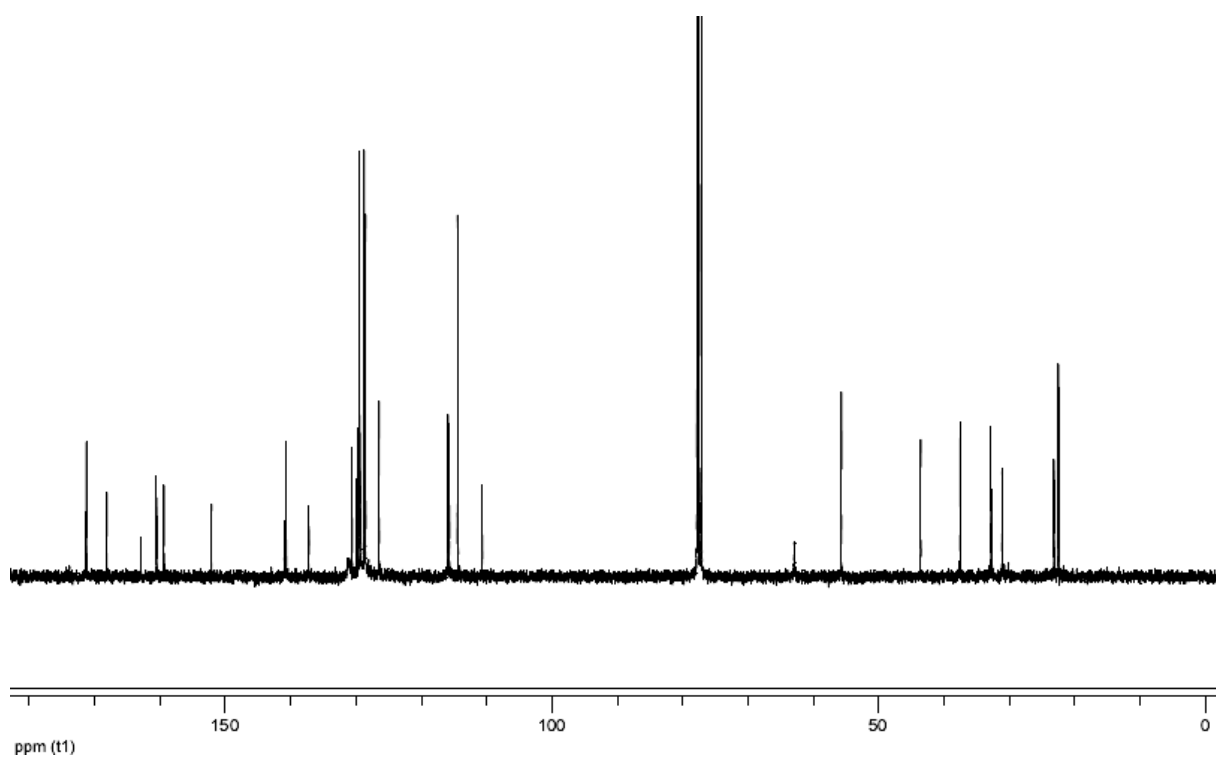

**2-(5-benzyl-2-isopropyl-4-methyl-6-phenylpyrrolo[2,3-*d*]pyrimidin-7-yl)-4-methylpentanoic acid 4-methoxybenzylamide**

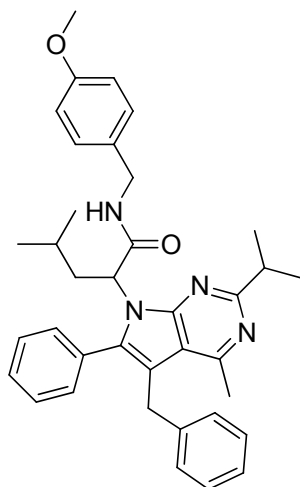

$C_{37}H_{42}N_4O_2$   
MW = 574.75 g.mol<sup>-1</sup>

**3j**

General procedure using **2j** (290 mg, 0.50 mmol) and NaH (14 mg, 0.60 mmol). Purification by flash chromatography (petroleum ether-diethyl ether, 70:30) gave **3j** as a yellow oil.

**Yield** 66 % (192 mg).

**R<sub>f</sub>** 0.3 (70:30 petroleum ether / diethyl ether).

**<sup>1</sup>H NMR (CDCl<sub>3</sub>, 400 MHz)** δ 7.64-7.32 (m, 5H), 7.32-7.25 (m, 3H), 7.24-7.18 (m, 3H), 7.06 (d, *J* = 7.6 Hz, 2H), 6.86 (d, *J* = 8.6 Hz, 2H), 4.92-4.78 (br s, 1H), 4.62 (dd, *J* = 14.6, 6.2 Hz, 1H), 4.30 (dd, *J* = 14.6, 4.9 Hz, 1H), 4.20 (d, *J* = 17.2 Hz, 1H), 4.04 (d, *J* = 17.2 Hz, 1H), 3.81 (s, 3H), 3.13 (sept, *J* = 6.9 Hz, 1H), 2.96-2.76 (br s, 1H), 2.49 (s, 3H), 1.86-1.77 (m, 1H), 1.25 (d, *J* = 6.9 Hz, 3H), 1.16 (d, *J* = 6.9 Hz, 3H), 0.93-0.80 (m, 1H), 0.67 (d, *J* = 6.6 Hz, 3H), 0.59 (d, *J* = 6.6 Hz, 3H).

**<sup>13</sup>C NMR (CDCl<sub>3</sub>, 100.6 MHz)** δ 172.0, 168.0, 160.5, 159.4, 152.3, 141.8, 140.9, 130.8, 130.1, 129.6, 129.5, 129.2, 129.0, 128.1, 126.5, 116.1, 114.4, 110.7, 61.7, 55.7, 43.6, 39.4, 37.5, 31.9, 25.2, 23.4, 23.2, 22.5, 22.4, 21.5.

**I.R.** (thin film) 1668, 1567, 1512, 1420 cm<sup>-1</sup>.

**HRMS** Calculated for C<sub>37</sub>H<sub>42</sub>N<sub>4</sub>O<sub>2</sub> 574.3308, found 574.3303.

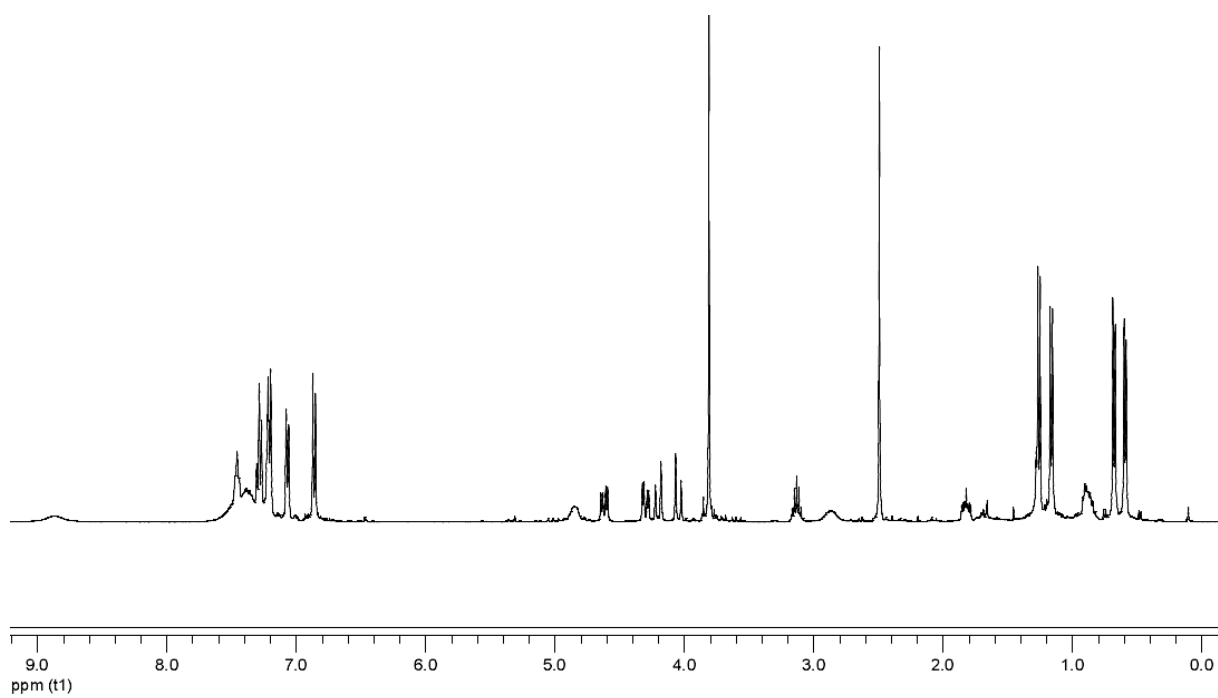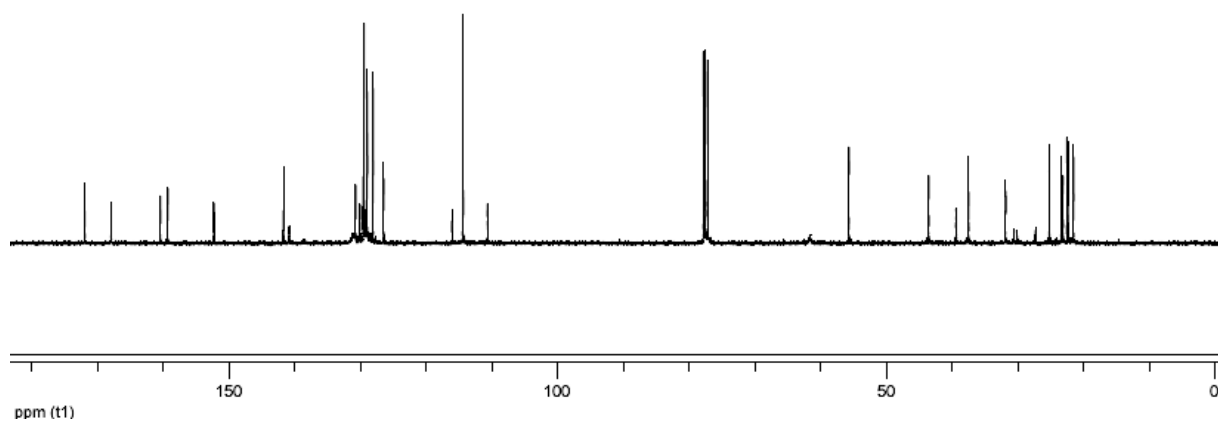

**2-[5-benzyl-6-(4-fluorophenyl)-2-isopropyl-4-methylpyrrolo[2,3-*d*]pyrimidin-7-yl]-4-methylpentanoic acid 4-methoxybenzylamide**

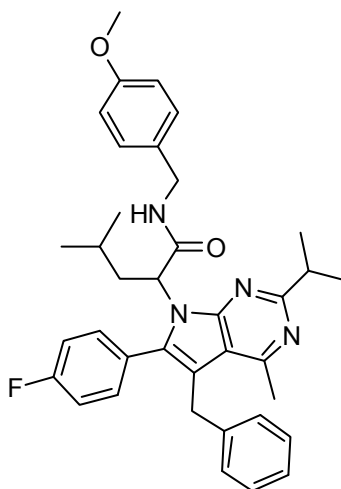

$C_{37}H_{41}FN_4O_2$   
MW = 592.75 g.mol<sup>-1</sup>

**3k**

General procedure using **2k** (110 mg, 0.19 mmol) and NaH (6 mg, 0.25 mmol). Purification by flash chromatography (petroleum ether-diethyl ether, 70:30) gave **3k** as a yellow oil.

**Yield** 73 % (80 mg).

**R<sub>f</sub>** 0.3 (70:30 petroleum ether / diethyl ether).

**<sup>1</sup>H NMR (CDCl<sub>3</sub>, 400 MHz)** δ 8.82 (br s, 1H), 7.43-7.25 (m, 4H), 7.24-7.14 (m, 5H), 7.04 (d, *J* = 7.2 Hz, 2H), 6.85 (d, *J* = 8.7 Hz, 2H), 4.87-4.74 (br s, 1H), 4.59 (dd, *J* = 14.6, 6.2 Hz, 1H), 4.28 (dd, *J* = 14.6, 5.0 Hz, 1H), 4.18 (d, *J* = 17.2 Hz, 1H), 4.00 (d, *J* = 17.2 Hz, 1H), 3.81 (s, 3H), 3.14 (sept, *J* = 6.9 Hz, 1H), 2.90-2.74 (br s, 1H), 2.50 (s, 3H), 1.88-1.78 (m, 1H), 1.25 (d, *J* = 6.9 Hz, 3H), 1.16 (d, *J* = 6.9 Hz, 3H), 0.96-0.84 (m, 1H), 0.68 (d, *J* = 6.6 Hz, 3H), 0.61 (d, *J* = 6.6 Hz, 3H).

**<sup>13</sup>C NMR (CDCl<sub>3</sub>, 100.6 MHz)** δ 171.8, 168.1, 163.6 (d, *J*<sub>C-F</sub> = 251.0 Hz), 160.6, 159.4, 152.3, 141.5, 139.6, 130.7, 129.5, 129.3 (d, *J*<sub>C-F</sub> = 8.1 Hz), 129.1, 128.1, 126.6, 126.2 (d, *J*<sub>C-F</sub> = 2.9 Hz), 116.4 (d, *J*<sub>C-F</sub> = 20.5 Hz), 116.0, 114.4, 111.0, 61.6, 55.7, 43.6, 39.4, 37.5, 31.8, 25.2, 23.3, 22.5, 22.3, 21.6.

**I.R.** (thin film) 1668, 1560, 1511, 1421 cm<sup>-1</sup>.

**HRMS** Calculated for C<sub>37</sub>H<sub>41</sub>FN<sub>4</sub>O<sub>2</sub> 592.3214, found 592.3210.

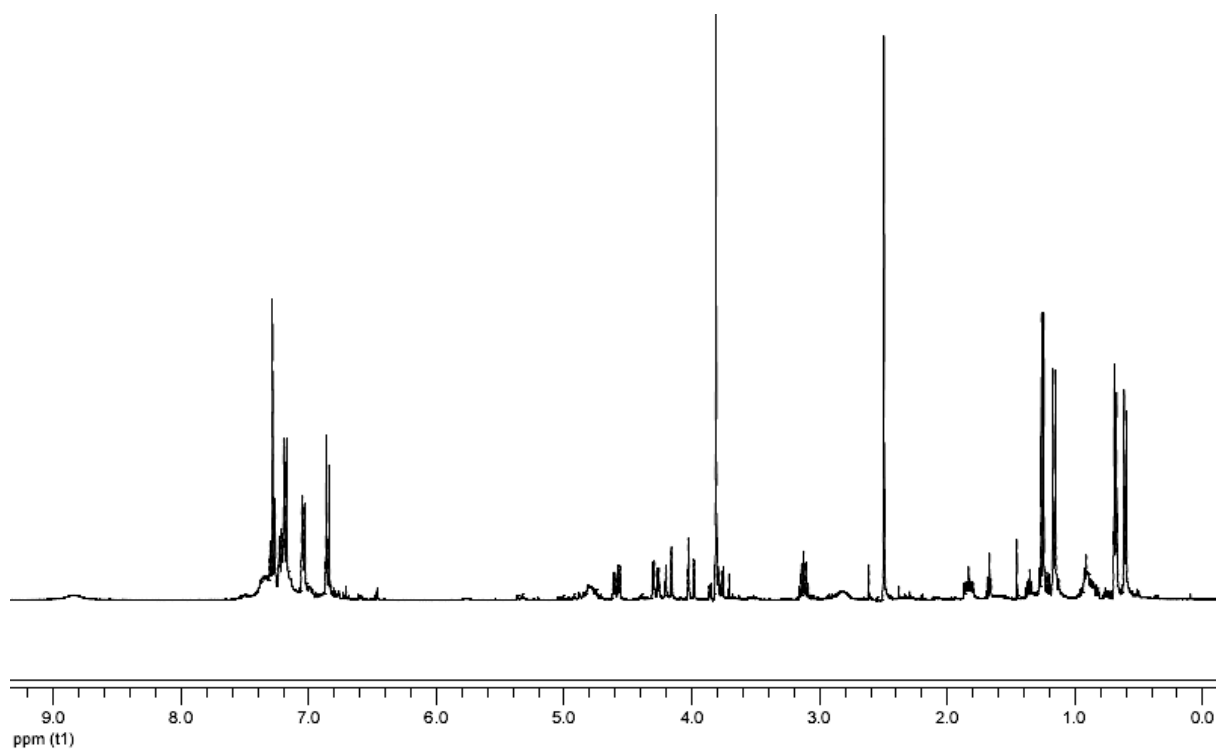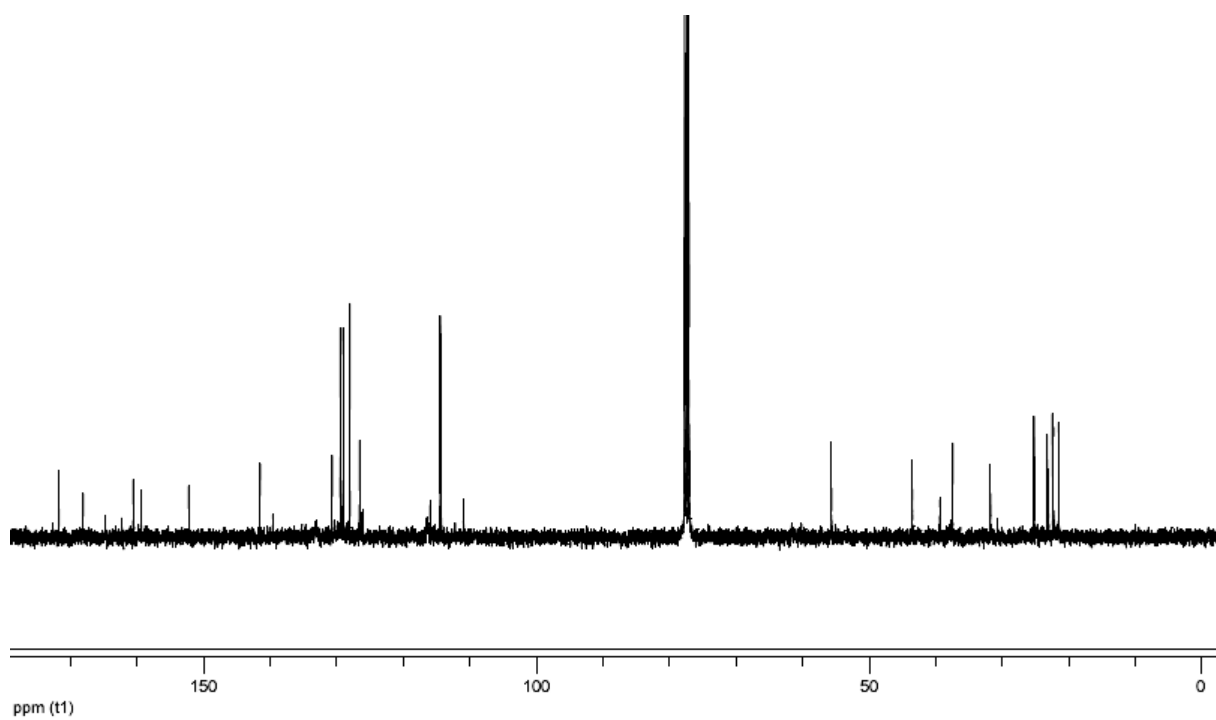

**2-[6-(2-chlorophenyl)-5-(4-fluorobenzyl)-2-isopropyl-4-methylpyrrolo[2,3-*d*]pyrimidin-7-yl]-*N*-(4-methoxybenzyl)-propionamide**

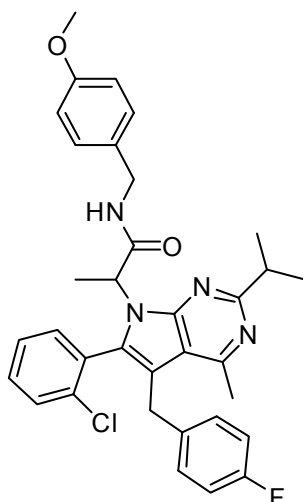

$C_{34}H_{34}ClFN_4O_2$   
MW = 585.11 g.mol<sup>-1</sup>

**31**

General procedure using **21** (260 mg, 0.44 mmol) and NaH (13 mg, 0.53 mmol). Purification by flash chromatography (petroleum ether-diethyl ether, 50:50) gave **31** as a yellow oil. Two atropoisomers were obtained in a 1:1 ratio.

**Yield** 54 % (140 mg).

**R<sub>f</sub>** 0.3 (70:30 petroleum ether / diethyl ether).

**<sup>1</sup>H NMR (CDCl<sub>3</sub>, 400 MHz)** δ 8.25 (t, *J* = 5.3 Hz, 1H), 7.90 (t, *J* = 5.3 Hz, 1H), 7.58-7.52 (m, 2H), 7.49-7.43 (m, 2H), 7.41-7.31 (m, 3H), 7.27 (dd, *J* = 7.6, 1.5 Hz, 1H), 7.12 (d, *J* = 8.6 Hz, 2H), 7.11 (d, *J* = 8.6 Hz, 2H), 7.00 (dd, *J*<sub>H-H, H-F</sub> = 8.7, 5.6 Hz, 4H), 6.92 (t, *J*<sub>H-H</sub> = *J*<sub>H-F</sub> = 8.7 Hz, 2H), 6.91 (t, *J*<sub>H-H</sub> = *J*<sub>H-F</sub> = 8.7 Hz, 2H), 6.85-6.79 (m, 4H), 4.65 (q, *J* = 7.3 Hz, 1H), 4.56 (q, *J* = 7.3 Hz, 1H), 4.51-4.43 (m, 2H), 4.35 (dd, *J* = 14.7, 5.4 Hz, 1H), 4.21 (dd, *J* = 14.7, 5.0 Hz, 1H), 4.07-3.97 (m, 2H), 3.93-3.85 (m, 2H), 3.81 (s, 3H), 3.80 (s, 3H), 3.16 (sept, *J* = 6.9 Hz, 1H), 3.14 (sept, *J* = 6.9 Hz, 1H), 2.49 (s, 3H), 2.48 (s, 3H), 2.03 (d, *J* = 7.3 Hz, 3H), 1.75 (d, *J* = 7.3 Hz, 3H), 1.30 (d, *J* = 6.9 Hz, 3H), 1.28 (d, *J* = 6.9 Hz, 3H), 1.24 (d, *J* = 6.9 Hz, 3H), 1.20 (d, *J* = 6.9 Hz, 3H).

**<sup>13</sup>C NMR (CDCl<sub>3</sub>, 100.6 MHz)** δ 171.5, 171.2, 168.6, 168.3, 161.7 (d, *J*<sub>C-F</sub> = 245.2 Hz), 160.5, 160.4, 159.4, 159.3, 152.0, 151.9, 136.8, 136.6 (d, *J*<sub>C-F</sub> = 2.9 Hz), 136.5, 136.2, 136.0, 134.0, 133.2, 131.8, 131.7, 130.7, 130.6, 130.5, 130.3, 129.7 (d, *J*<sub>C-F</sub> = 8.1 Hz), 129.6 (d, *J*<sub>C-F</sub> = 8.1 Hz), 129.6, 129.5, 129.4, 129.3, 127.8, 127.6, 115.7, 115.6 (d, *J*<sub>C-F</sub> = 21.2 Hz), 115.6 (d, *J*<sub>C-F</sub> = 21.2 Hz), 114.4, 114.3, 112.2, 111.9, 58.4, 57.2, 55.7, 55.7, 43.6, 43.4, 37.6, 37.5, 31.2, 31.1, 23.3, 23.2, 22.6, 22.4, 22.4.

**I.R.** (thin film) 1669, 1562, 1500, 1422 cm<sup>-1</sup>.

**HRMS** Calculated for C<sub>34</sub>H<sub>34</sub>ClFN<sub>4</sub>O<sub>2</sub> 584.2354, found 584.2329.

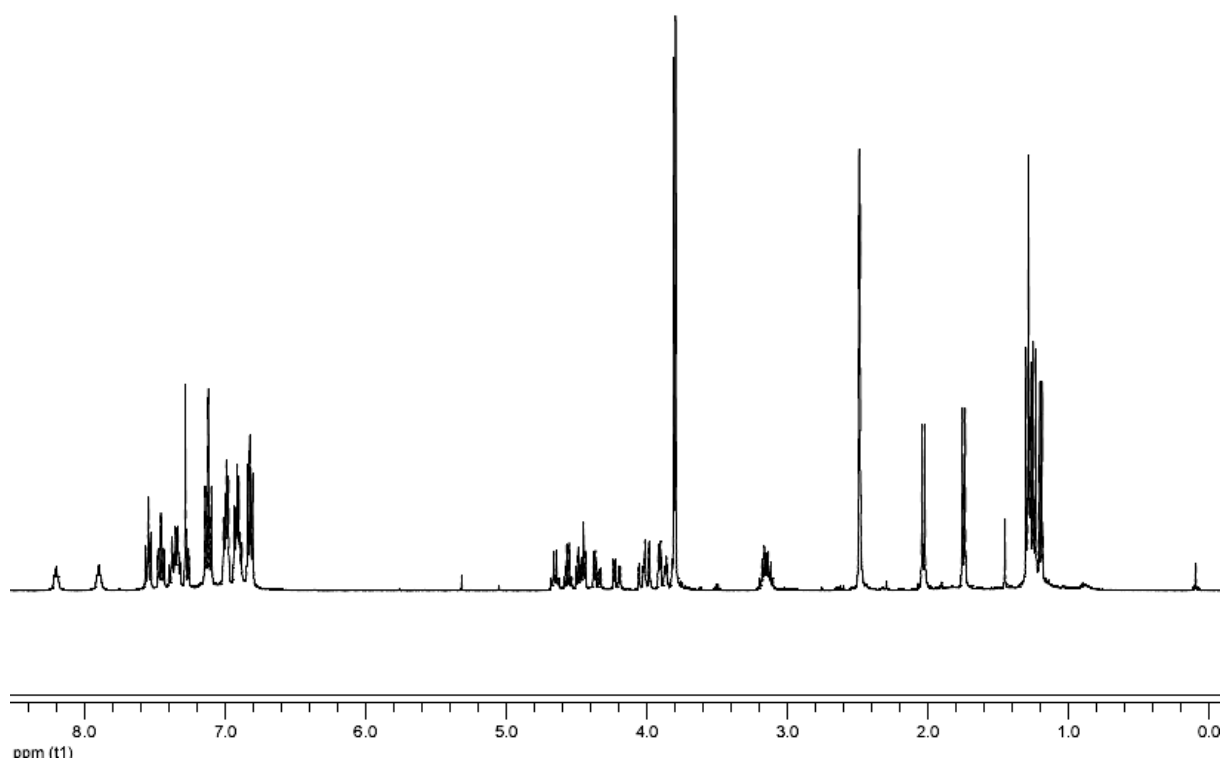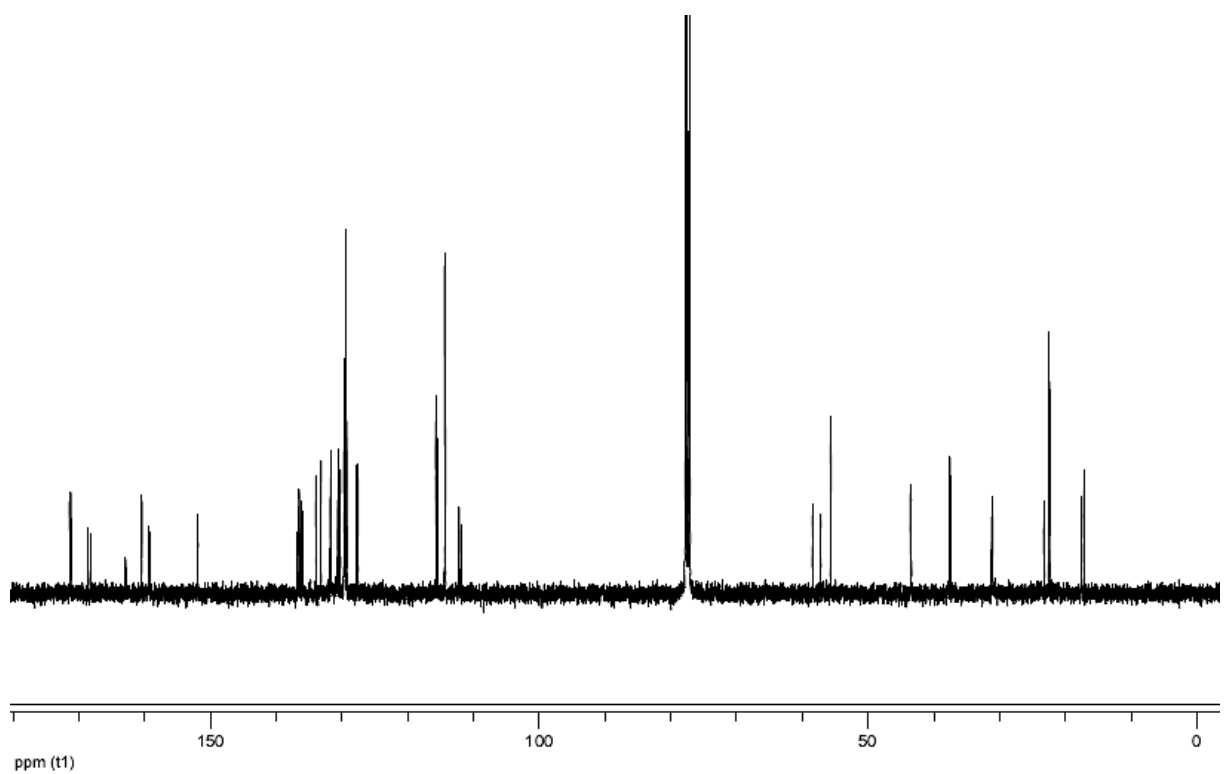

**benzylethyl-(5-iodo-2-isopropyl-6-methylpyrimidin-4-yl)-amine**

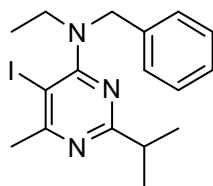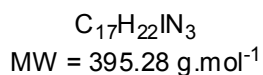

To a 0.5 M solution of 5-iodo-2-isopropyl-6-methylpyrimidin-4-ol (600 mg, 1.4 mmol) in THF was added benzylethylamine (520  $\mu$ L, 2.5 equiv.) and the resulting mixture was stirred at 45°C for two days. Purification by flash chromatography (petroleum ether-diethyl ether, 95:05) gave benzylethyl-(5-iodo-2-isopropyl-6-methylpyrimidin-4-yl)-amine as a colorless oil.

**Yield** 36 % (200 mg).

**R<sub>f</sub>** 0.3 (95:05 petroleum ether / diethyl ether).

**<sup>1</sup>H NMR (CDCl<sub>3</sub>, 400 MHz)**  $\delta$  7.41-7.36 (m, 2H), 7.36-7.30 (m, 2H), 7.28-7.22 (m, 1H), 4.72 (s, 2H), 3.51 (q,  $J$  = 7.0 Hz, 2H), 2.98 (sept,  $J$  = 6.8 Hz, 1H), 2.67 (s, 3H), 1.27-1.22 (m, 9H).

**<sup>13</sup>C NMR (CDCl<sub>3</sub>, 100.6 MHz)**  $\delta$  172.6, 170.0, 166.7, 139.1, 128.6, 128.2, 127.2, 81.7, 53.7, 45.9, 37.0, 31.0, 22.1, 13.3.

**I.R.** (thin film) 1536, 1511, 1426, 1347 cm<sup>-1</sup>.

**HRMS** Calculated for C<sub>17</sub>H<sub>22</sub>IN<sub>3</sub> 395.0858, found 395.0858.



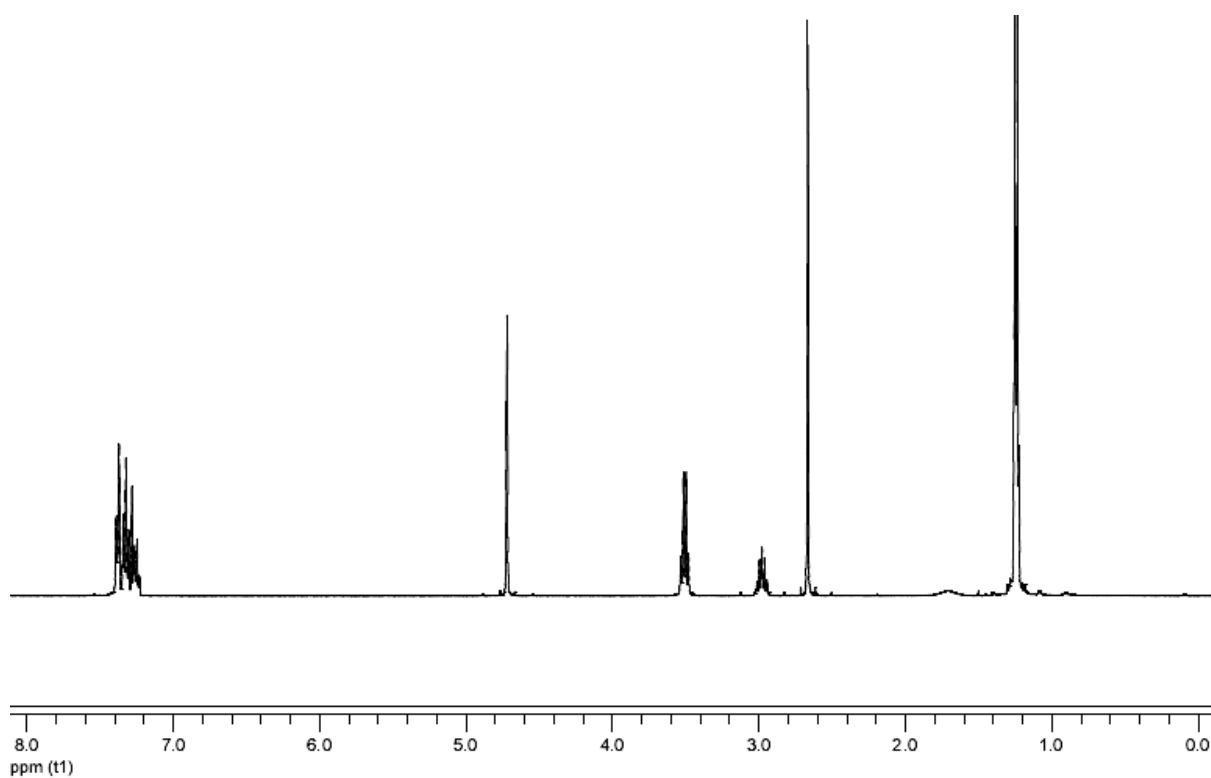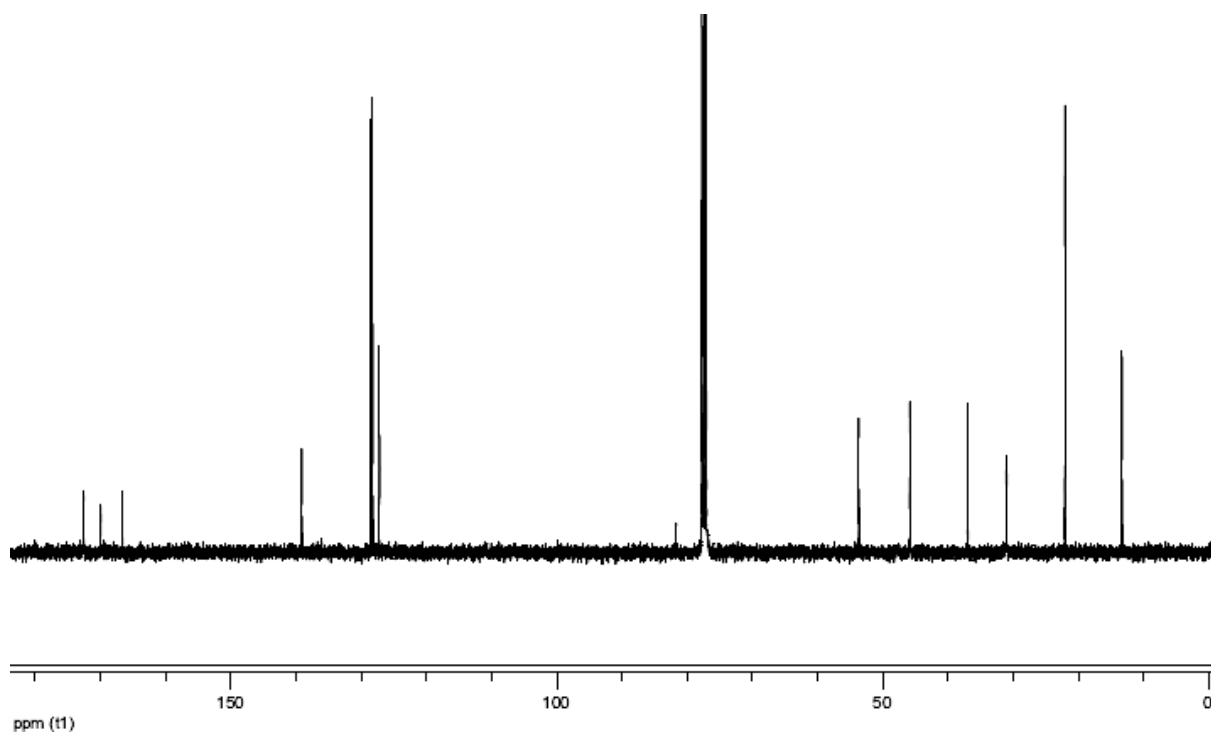

**benzylethyl-(2-isopropyl-6-methyl-5-phenylethynylpyrimidin-4-yl)-amine**

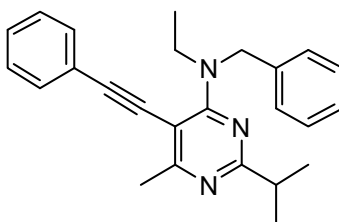

$C_{25}H_{27}N_3$   
MW = 369.50 g.mol<sup>-1</sup>

**4**

General procedure using benzylethyl-(5-iodo-2-isopropyl-6-methylpyrimidin-4-yl)-amine (200 mg, 0.51 mmol), phenylacetylene (80  $\mu$ L, 0.61 mmol), *bis*(triphenylphosphine)palladium chloride (18 mg, 0.03 mmol), CuI (5 mg, 0.03 mmol) and diisopropylethylamine (90  $\mu$ L, 0.51 mmol). Purification by flash chromatography (petroleum ether-diethyl ether, 70:30) afforded **4** as a colorless oil.

**Yield** 32 % (60 mg).

**R<sub>f</sub>** 0.3 (90:10 petroleum ether / diethyl ether).

**<sup>1</sup>H NMR (CDCl<sub>3</sub>, 400 MHz)**  $\delta$  7.37-7.34 (m, 4H), 7.28-7.23 (m, 4H), 7.14-7.09 (m, 2H), 5.14 (s, 2H), 3.84 (q,  $J$  = 7.0 Hz, 2H), 2.99 (sept,  $J$  = 6.8 Hz, 1H), 2.63 (s, 3H), 1.33 (t,  $J$  = 7.0 Hz, 3H), 1.27 (d,  $J$  = 6.8 Hz, 6H).

**<sup>13</sup>C NMR (CDCl<sub>3</sub>, 100.6 MHz)**  $\delta$  172.1, 170.2, 161.7, 139.5, 131.0, 128.8, 128.7, 128.3, 127.8, 127.3, 123.9, 99.6, 96.7, 86.1, 52.2, 44.1, 37.9, 24.5, 22.0, 13.7.

**I.R.** (thin film) 1529, 1490, 1430, 1360 cm<sup>-1</sup>.

**HRMS** Calculated for C<sub>25</sub>H<sub>27</sub>N<sub>3</sub> 369.2205, found 369.2213.

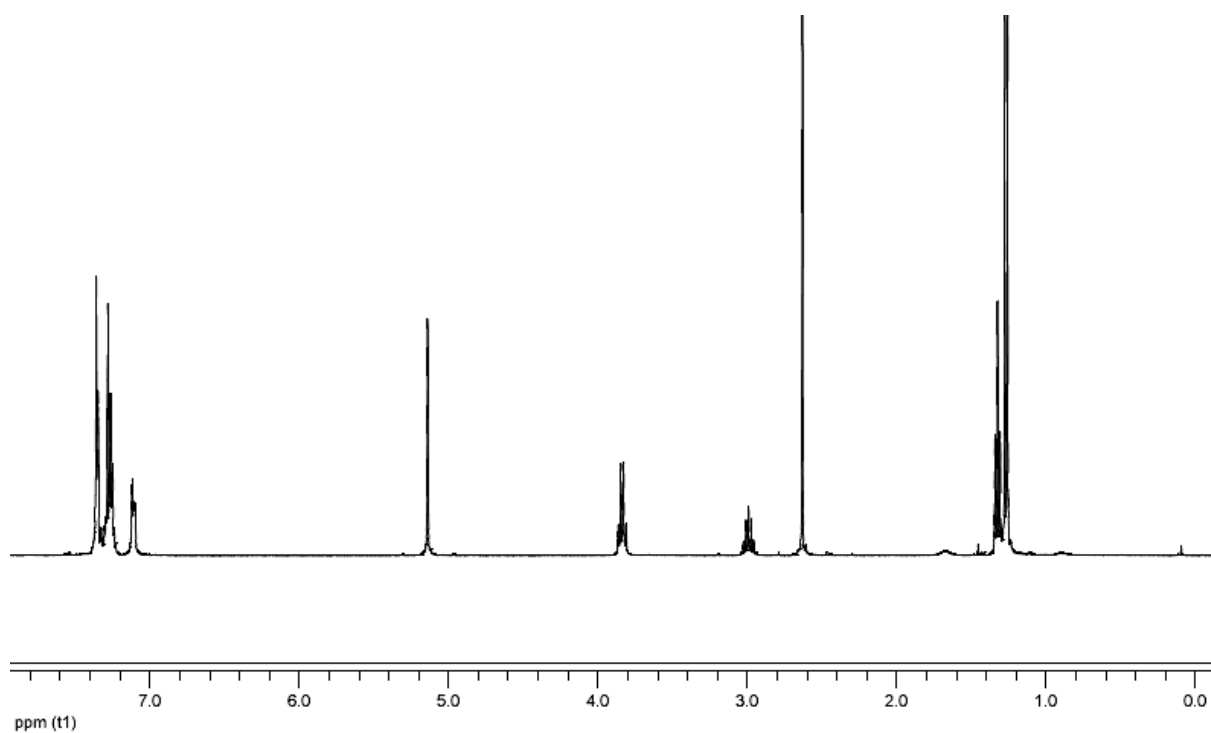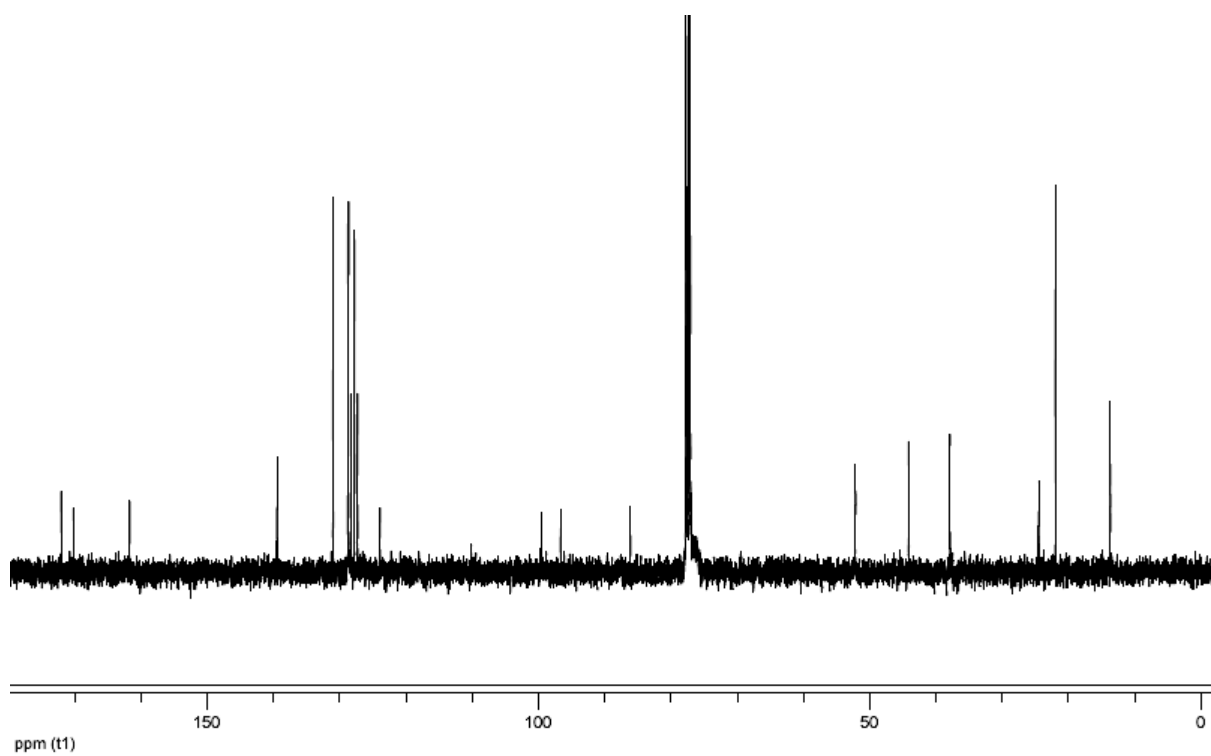

***N*-(4-chlorobenzyl)-2-[(4-chlorobenzyl)-(5-iodo-2-isopropyl-6-methylpyrimidin-4-yl)-amino]-2-methylbutyramide**

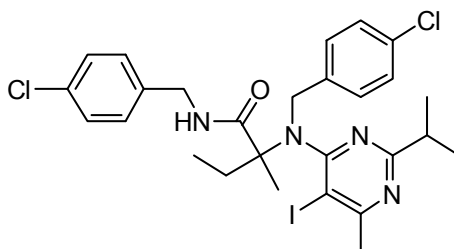

$C_{27}H_{31}Cl_2IN_4O$   
MW = 625.37 g.mol<sup>-1</sup>

General procedure using butan-2-one (180  $\mu$ L, 2 mmol), *p*-chlorobenzylamine (250  $\mu$ L, 2 mmol), *p*-chlorobenzylisocyanide (260  $\mu$ L, 2 mmol) and 5-iodo-2-isopropyl-6-methylpyrimidin-4-ol (560 mg, 2 mmol). Purification by flash chromatography (petroleum ether-diethyl ether, 50:50) gave the Ugi-Smiles adduct as a colorless oil.

**Yield** 9 % (110 mg).

**R<sub>f</sub>** 0.3 (60:40 petroleum ether / diethyl ether).

**<sup>1</sup>H NMR (CDCl<sub>3</sub>, 400 MHz)**  $\delta$  8.80 (s, 1H), 7.36-7.29 (m, 4H), 7.03 (d,  $J$  = 8.3 Hz, 2H), 6.71 (d,  $J$  = 8.3 Hz, 2H), 4.53-4.40 (m, 2H), 4.33 (d,  $J$  = 13.0 Hz, 1H), 4.03 (d,  $J$  = 13.0 Hz, 1H), 3.00 (sept,  $J$  = 6.8 Hz, 1H), 2.61 (s, 3H), 1.75-1.66 (m, 1H), 1.66 (s, 3H), 1.51-1.37 (m, 1H), 1.26 (d,  $J$  = 6.8 Hz, 6H), 0.82 (t,  $J$  = 7.4 Hz, 3H).

**<sup>13</sup>C NMR (CDCl<sub>3</sub>, 100.6 MHz)**  $\delta$  175.4, 174.2, 172.5, 168.2, 137.8, 135.3, 133.8, 133.6, 131.4, 130.1, 129.3, 128.4, 100.3, 70.0, 54.8, 43.5, 36.9, 31.6, 30.7, 22.1, 18.3, 9.6.

**I.R.** (thin film) 1672, 1531, 1507, 1492 cm<sup>-1</sup>.

**HRMS** Calculated for C<sub>27</sub>H<sub>31</sub>Cl<sub>2</sub>IN<sub>4</sub>O 624.0920, found 624.0916.

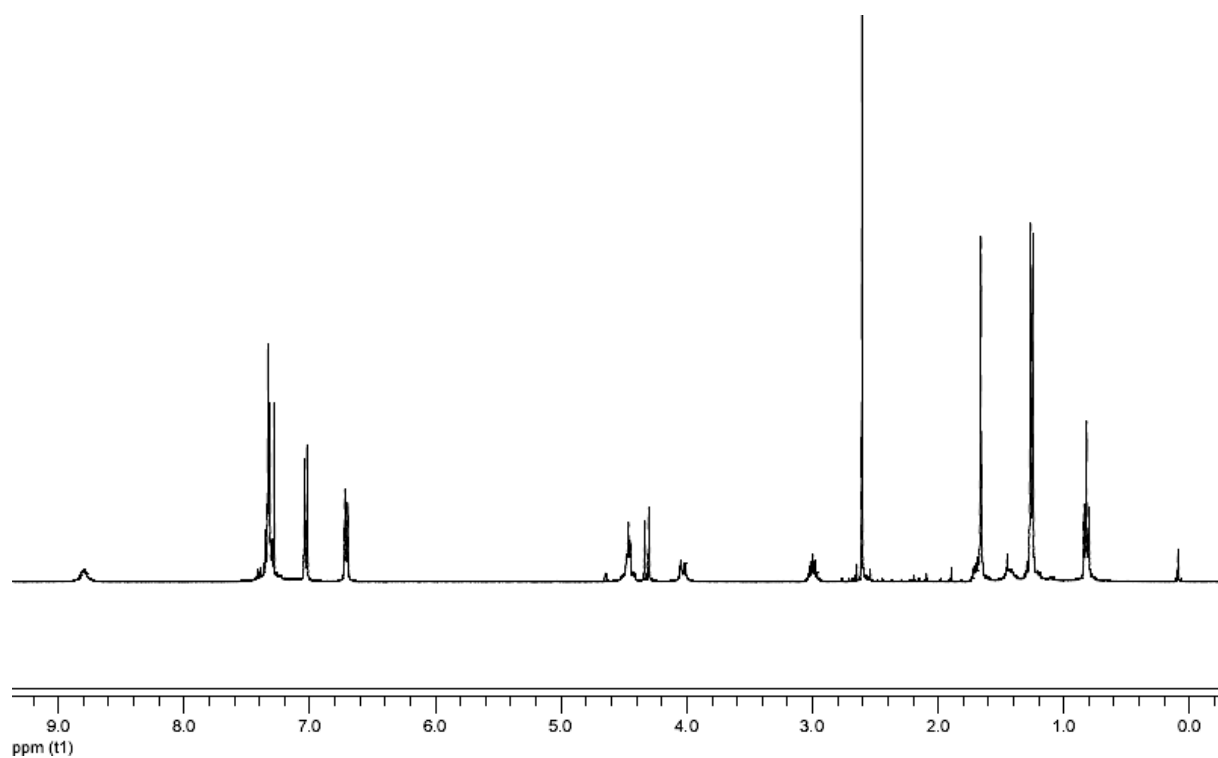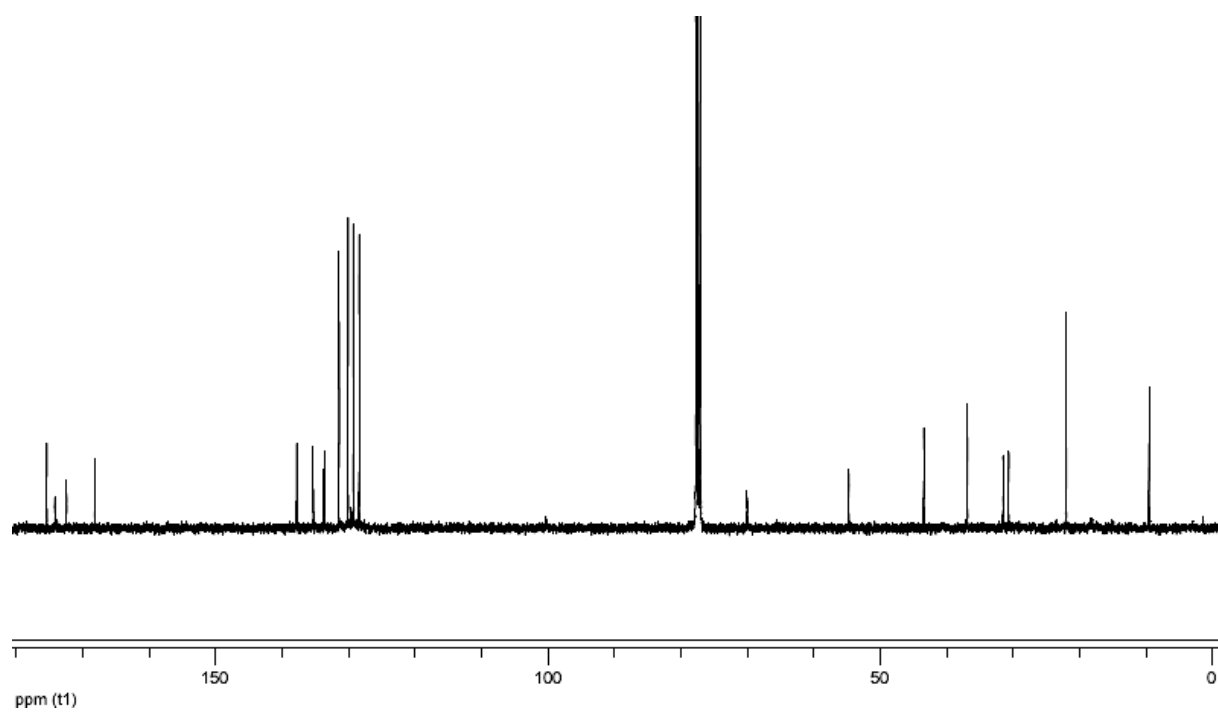

***N*-(4-chlorobenzyl)-2-[(4-chlorobenzyl)-(2-isopropyl-6-methyl-5-phenylethynylpyrimidin-4-yl)-amino]-2-methylbutyramide**

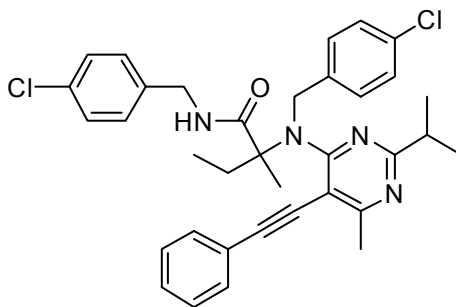

$C_{35}H_{36}Cl_2N_4O$   
MW=599.59 g.mol<sup>-1</sup>

**5**

General procedure using *N*-(4-chlorobenzyl)-2-[(4-chlorobenzyl)-(5-iodo-2-isopropyl-6-methylpyrimidin-4-yl)-amino]-2-methylbutyramide (150 mg, 0.24 mmol), phenylacetylene (40  $\mu$ L, 0.29 mmol), *bis*(triphenylphosphine)palladium chloride (8 mg, 0.01 mmol), CuI (2 mg, 0.01 mmol) and diisopropylethylamine (40  $\mu$ L, 0.24 mmol). Purification by flash chromatography (petroleum ether-diethyl ether, 70:30) afforded **5** as a colorless oil.

**Yield** 57 % (82 mg).

**R<sub>f</sub>** 0.3 (70:30 petroleum ether / diethyl ether).

**<sup>1</sup>H NMR (CDCl<sub>3</sub>, 400 MHz)**  $\delta$  7.75 (t,  $J$  = 6.1 Hz, 1H), 7.37-7.31 (m, 3H), 7.24 (d,  $J$  = 8.3 Hz, 2H), 7.18-7.04 (m, 8H), 4.97 (d,  $J$  = 16.0 Hz, 1H), 4.79 (d,  $J$  = 16.0 Hz, 1H), 4.32 (dd,  $J$  = 14.7, 6.0 Hz, 1H), 4.25 (dd,  $J$  = 14.7, 5.5 Hz, 1H), 2.96 (sept,  $J$  = 6.8 Hz, 1H), 2.61 (s, 3H), 2.15-2.03 (m, 1H), 1.90-1.80 (m, 1H), 1.59 (s, 3H), 1.22 (d,  $J$  = 6.8 Hz, 3H), 1.23 (d,  $J$  = 6.8 Hz, 3H), 0.90 (t,  $J$  = 7.4 Hz, 3H).

**<sup>13</sup>C NMR (CDCl<sub>3</sub>, 100.6 MHz)**  $\delta$  175.4, 171.9, 171.1, 165.3, 138.3, 137.7, 133.6, 133.2, 131.3, 129.8, 129.6, 129.2, 129.1, 128.9, 128.7, 123.0, 107.2, 101.4, 84.6, 68.6, 52.6, 43.4, 37.9, 30.9, 24.4, 21.9, 21.8, 21.2, 9.0.

**I.R.** (thin film) 1667, 1523, 1490, 1404 cm<sup>-1</sup>.

**HRMS** Calculated for C<sub>35</sub>H<sub>36</sub>Cl<sub>2</sub>N<sub>4</sub>O 598.2266, found 598.2256.

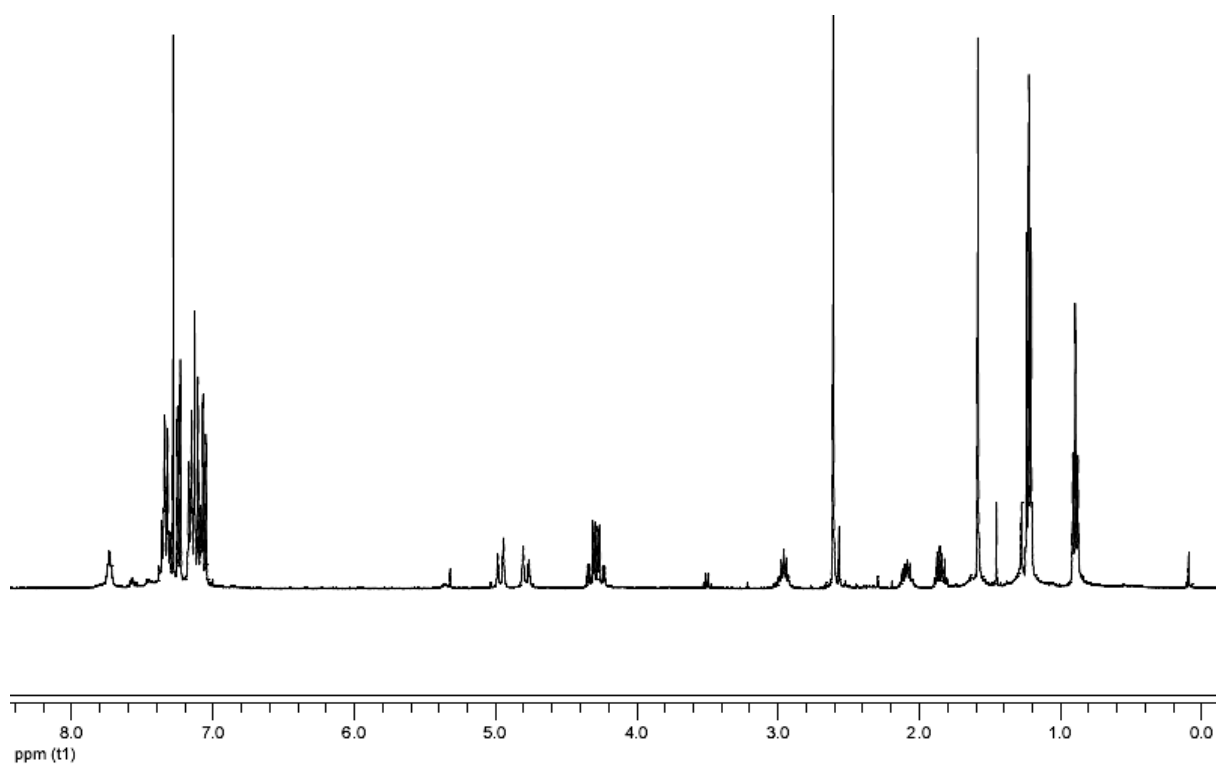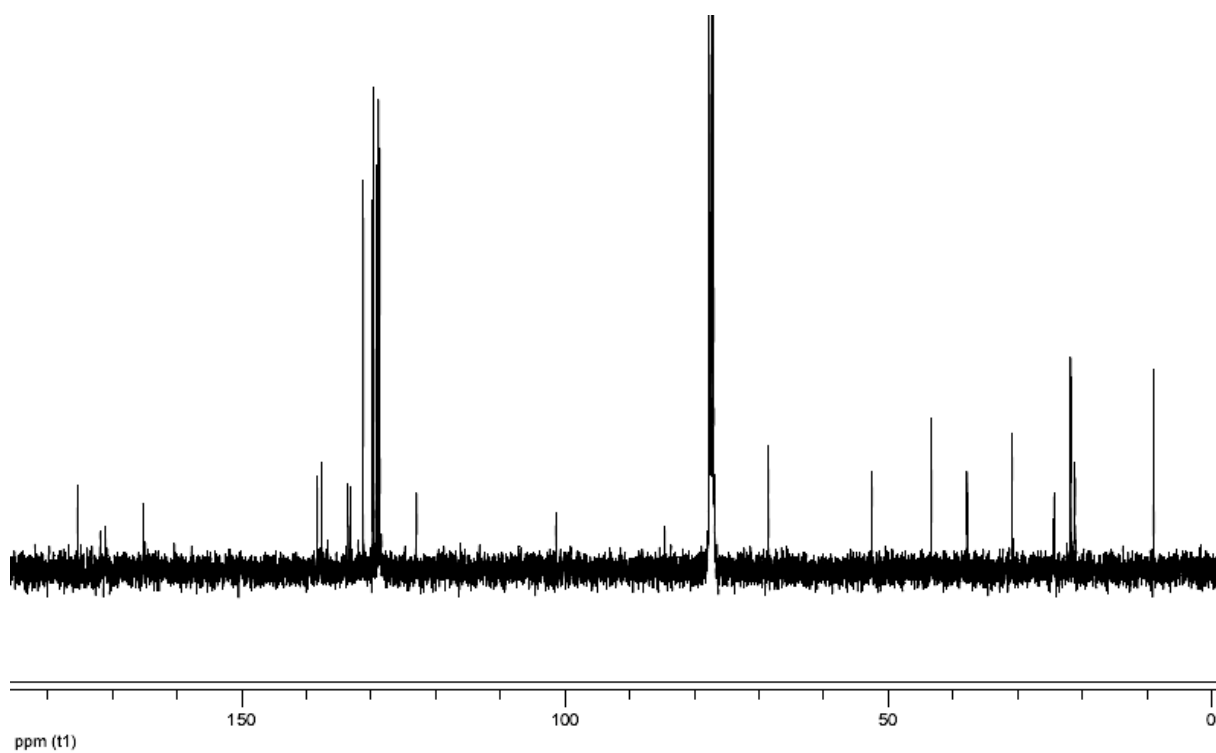

**2-(3-chloro-*N*-(4-chlorobenzyl)-2,2-dimethylpropanamido)-*N*-(4-chlorobenzyl)-4-methylpentanamide**

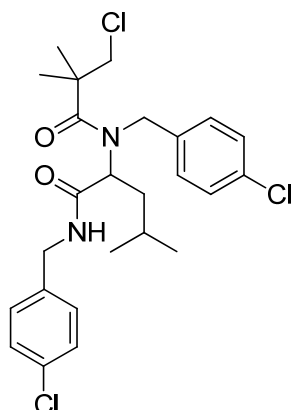

$C_{25}H_{31}Cl_3N_2O_2$   
MW = 497.88 g.mol<sup>-1</sup>

**6**

General procedure for this Ugi adduct using isobutyraldehyde (200  $\mu$ L, 2 mmol), *p*-chlorobenzylamine (250  $\mu$ L, 2 mmol), *p*-chlorobenzylisocyanide (260  $\mu$ L, 2 mmol) and 3-chloro-2,2-dimethylpropionic acid (273 mg, 2 mmol). Purification by flash column chromatography (petroleum ether-diethyl ether, 50:50) gave **6** as a colorless oil.

**Yield** 81 % (810 mg).

**R<sub>f</sub>** 0.3 (70:30 petroleum ether / diethyl ether).

**<sup>1</sup>H NMR (CDCl<sub>3</sub>, 400 MHz)**  $\delta$  7.30 (d,  $J$  = 8.4 Hz, 2H), 7.28 (d,  $J$  = 8.4 Hz, 2H), 7.19 (d,  $J$  = 8.4 Hz, 2H), 7.16 (d,  $J$  = 8.4 Hz, 2H), 4.75 (d,  $J$  = 17.2 Hz, 1H), 4.69 (d,  $J$  = 17.2 Hz, 1H), 4.46-4.38 (m, 1H), 4.33 (dd,  $J$  = 14.9, 6.0 Hz, 1H), 4.26 (dd,  $J$  = 14.9, 6.0 Hz, 1H), 3.73 (d,  $J$  = 10.8 Hz, 1H), 3.69 (d,  $J$  = 10.8 Hz, 1H), 2.01-1.89 (m, 1H), 1.59-1.47 (m, 2H), 1.37 (s, 3H), 1.34 (s, 3H), 0.86 (d,  $J$  = 6.6 Hz, 3H), 0.84 (d,  $J$  = 6.6 Hz, 3H).

**<sup>13</sup>C NMR (CDCl<sub>3</sub>, 100.6 MHz)**  $\delta$  177.4, 171.2, 137.2, 135.7, 133.9, 133.5, 61.0, 55.1, 50.7, 46.2, 43.1, 38.3, 25.8, 25.0, 23.2, 22.8.

**HRMS** Calculated for C<sub>25</sub>H<sub>31</sub>Cl<sub>3</sub>N<sub>2</sub>O<sub>2</sub> 496.1451, found 496.1452.



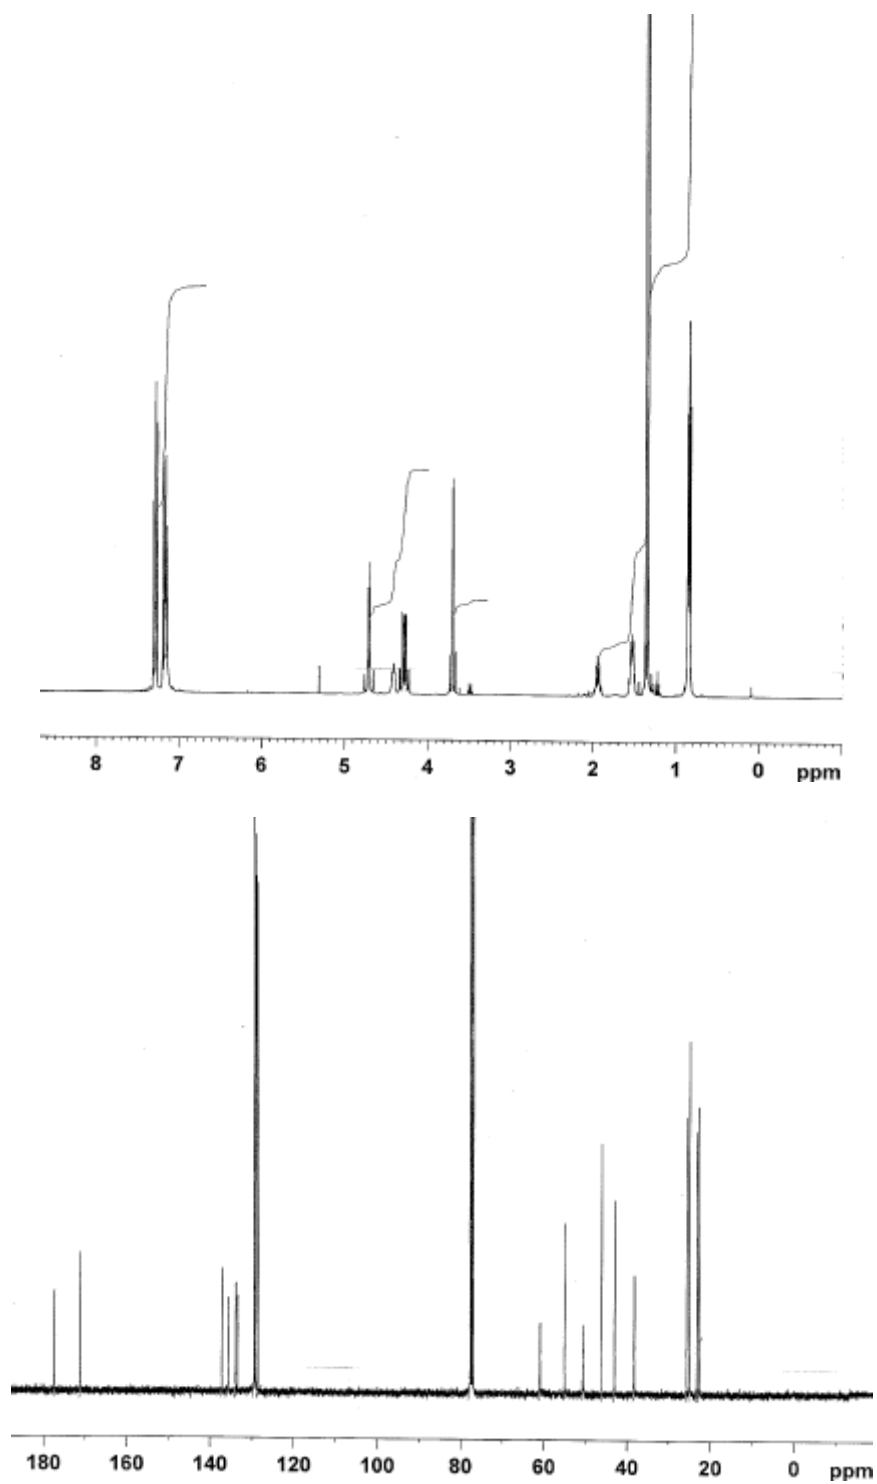

***N*-(4-chlorobenzyl)-2-(*N*-(4-chlorobenzyl)cinnamamido)-4-methylpentanamide**

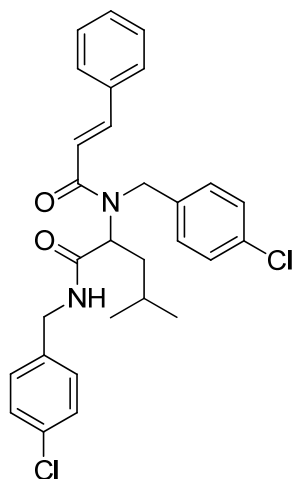

$C_{29}H_{30}Cl_2N_2O_2$   
MW = 509.47 g.mol<sup>-1</sup>

7

General procedure for this Ugi adduct using isobutyraldehyde (200  $\mu$ L, 2 mmol), *p*-chlorobenzylamine (250  $\mu$ L, 2 mmol), *p*-chlorobenzylisocyanide (260  $\mu$ L, 2 mmol) and *trans*-cinnamic acid (296 mg, 2 mmol). Purification by flash column chromatography (petroleum ether-diethyl ether, 60:40) gave **7** as a colorless oil.

**Yield** 86 % (880 mg).

**R<sub>f</sub>** 0.3 (60:40 petroleum ether / diethyl ether).

**<sup>1</sup>H NMR (CDCl<sub>3</sub>, 400 MHz)**  $\delta$  7.76 (d,  $J$  = 15.3 Hz, 1H), 7.44-7.34 (m, 5H), 7.34-7.25 (m, 4H), 7.21-7.15 (m, 4H), 7.12 (t,  $J$  = 5.3 Hz, 1H), 6.65 (d,  $J$  = 15.3 Hz, 1H), 5.20 (t,  $J$  = 7.6 Hz, 1H), 4.75 (d,  $J$  = 18.0 Hz, 1H), 4.69 (d,  $J$  = 18.0 Hz, 1H), 4.39 (dd,  $J$  = 15.0, 5.9 Hz, 1H), 4.32 (dd,  $J$  = 15.0, 6.0 Hz, 1H), 1.96-1.86 (m, 1H), 1.53 (sept,  $J$  = 6.5 Hz, 1H), 1.48-1.37 (m, 1H), 0.90 (d,  $J$  = 6.5 Hz, 3H), 0.86 (d,  $J$  = 6.5 Hz, 3H).

**<sup>13</sup>C NMR (CDCl<sub>3</sub>, 100.6 MHz)**  $\delta$  171.1, 169.1, 145.2, 137.2, 136.7, 135.0, 133.7, 133.6, 130.6, 129.4, 129.4, 129.3, 129.2, 128.4, 127.9, 117.6, 56.6, 48.1, 43.1, 37.5, 25.6, 23.3, 22.8.

**HRMS** Calculated for C<sub>29</sub>H<sub>30</sub>Cl<sub>2</sub>N<sub>2</sub>O<sub>2</sub> 508.1684, found 508.1677.

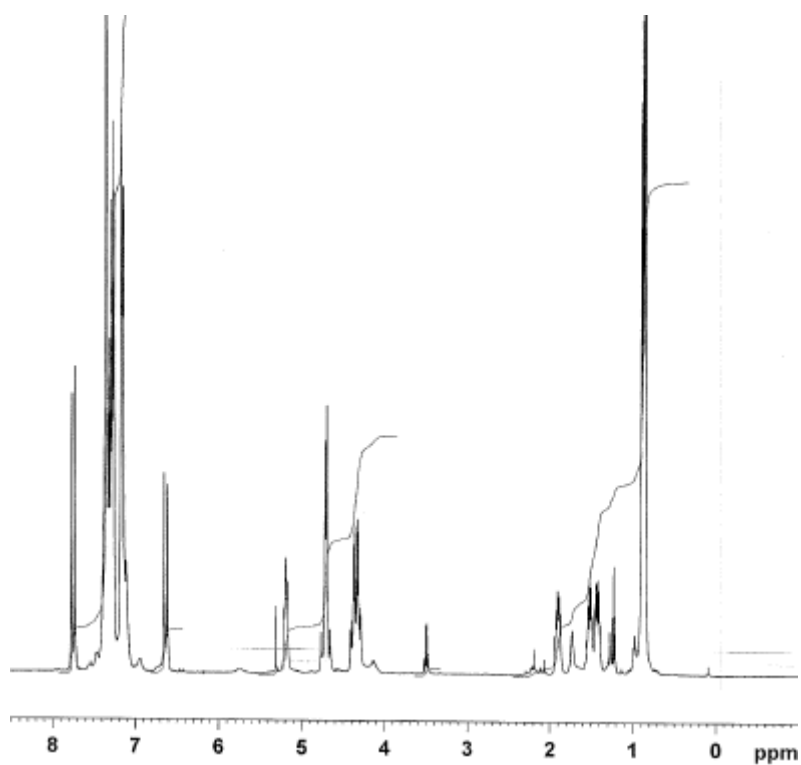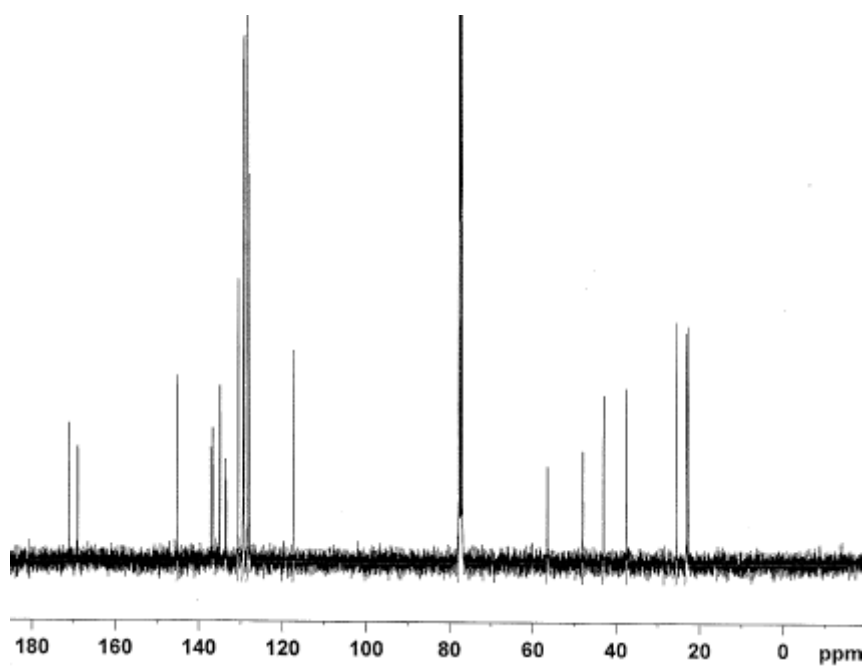

Supplement: c3ob41477a.pdf [file c3ob41477a.pdf]
